# Supplementary material
Source: publisher figshare collection journal article supplement (https://tandf.figshare.com/articles/dataset/_/8797496)
Supplement: Supplementary file 1 [file 1]

## Sheet: Supplementary Table 3
Supplementary Table 3. The identification of peptides in the experiment to quantify the protein amount in each of 96 fractions separated by subsequent nano-LC-MS/MS using SILAC method.
Serial No. for all proteins	Master Protein Accessions (UniProt ID)	Master Protein Accessions (Gene Symbol)	Annotated Sequence	Positions in Master Proteins	Modifications	Modifications in Master Proteins	# Missed Cleavages	Theo. MH+ [Da]	WCE	Fr1	Fr2	Fr3	Fr4	Fr5	Fr6	Fr7	Fr8	Fr9	Fr10	Fr11	Fr12	Fr13	Fr14	Fr15	Fr16	Fr17	Fr18	Fr19	Fr20	Fr21	Fr22	Fr23	Fr24	Fr25	Fr26	Fr27	Fr28	Fr29	Fr30	Fr31	Fr32	Fr33	Fr34	Fr35	Fr36	Fr37	Fr38	Fr39	Fr40
0	A0A0A0MSS8; Q04828	AKR1C3	[R].HIDSAHLYNNEEQVGLAIR.[S]	A0A0A0MSS8 [48-66]; Q04828 [48-66]			0	2179.09	0.0162595								-0.00469882		0.0577032	0.0916323																		-0.411305								-0.248103			-0.112027
0	A0A0A0MSS8	AKR1C3	[K].LNDGHFMPVLGFGTYAPPEVPR.[S]	A0A0A0MSS8 [10-31]			0	2414.2	-0.0188627
0	A0A0A0MSS8	AKR1C3	[K].YKPVCNQVECHPYFNR.[S]	A0A0A0MSS8 [184-199]	2xCarbamidomethyl [C5; C10]		0	2110.96	0.202747						-0.0787316																-1.14755	-0.828275	0.0431931			0.0172763	-1.02664	-0.227797					0.556046						-0.130458
0	A0A0A0MSS8	AKR1C3	[R].NLHYFNSDSFASHPNYPYSDEY.[-]	A0A0A0MSS8 [302-323]			0	2667.11
0	A0A0A0MSS8; P52895; Q04828	AKR1C3	[K].RTPALIALR.[Y]	A0A0A0MSS8 [250-258]; P52895 [250-258]; Q04828 [250-258]			1	1010.65	0.0799057											0.0285295												-0.157524	-0.0114849				-0.303746	-0.0187004							0.171332				-0.0870724
0	A0A0A0MSS8; P52895; Q04828	AKR1C3	[K].REDIFYTSK.[L]	A0A0A0MSS8 [76-84]; P52895 [76-84]; Q04828 [76-84]			1	1158.58	0.0943438					-0.890061										0.624277			-0.518899		-1.51169		0.243017	-0.240207	-1.16019		0.217029					-0.312604									-0.275877
0	A0A0A0MSS8	AKR1C3	[K].DIVLVAYSALGSQR.[D]	A0A0A0MSS8 [210-223]			0	1491.82																																									-0.221002
0	A0A0A0MSS8	AKR1C3	[R].QNVQVFEFQLTAEDMK.[A]	A0A0A0MSS8 [279-294]			0	1926.93
0	A0A0A0MSS8	AKR1C3	[K].AQLDYVDLYLIHSPMSLKPGEELSPTDENGK.[V]	A0A0A0MSS8 [106-136]			0	3459.7
0	A0A0A0MSS8	AKR1C3	[K].LNDGHFMPVLGFGTYAPPEVPR.[S]	A0A0A0MSS8 [10-31]	1xOxidation [M7]		0	2430.19										-0.436229			-0.38732							0.176664				0.297471							0.197664										-0.108943
0	A0A0A0MSS8; Q04828	AKR1C3	[R].QLEMILNKPGLK.[Y]	A0A0A0MSS8 [172-183]; Q04828 [172-183]			0	1383.8	0.0535368
0	A0A0A0MSS8	AKR1C3	[R].WVDPNSPVLLEDPVLCALAK.[K]	A0A0A0MSS8 [227-246]	1xCarbamidomethyl [C16]		0	2236.17										0.0438141				0.419772	-0.348041			-0.380177																							-0.144883
1	Q9H0W9	C11orf54	[K].DNFADVQVSVVDCPDLTKEPFTFPVK.[G]	Q9H0W9 [26-51]	1xCarbamidomethyl [C13]		1	2967.44																					-0.206998
1	Q9H0W9	C11orf54	[K].DNFADVQVSVVDCPDLTK.[E]	Q9H0W9 [26-43]	1xCarbamidomethyl [C13]		0	2021.95
1	Q9H0W9	C11orf54	[K].SHIMPAEFSSCPLNSDEEVNK.[W]	Q9H0W9 [216-236]	1xCarbamidomethyl [C11]		0	2391.06																					-0.180845	-0.464804
1	Q9H0W9	C11orf54	[K].HYGNKPIGMGGTFIIQK.[G]	Q9H0W9 [195-211]			0	1860.98						0.691764															-0.0689397	0.831286			1.10788			0.888579
1	Q9H0W9	C11orf54	[R].LEHTHFFSR.[H]	Q9H0W9 [264-272]			0	1173.58																					-0.074302	-0.118379														0.874462
1	Q9H0W9	C11orf54	[R].TGPLNFVTCMR.[E]	Q9H0W9 [179-189]	1xCarbamidomethyl [C9]		0	1295.62																					-0.0703027
1	Q9H0W9	C11orf54	[R].TGPLNFVTCMR.[E]	Q9H0W9 [179-189]	1xCarbamidomethyl [C9]; 1xOxidation [M10]		0	1311.62																					-0.136028
1	Q9H0W9	C11orf54	[K].HYGNKPIGMGGTFIIQK.[G]	Q9H0W9 [195-211]	1xOxidation [M9]		0	1876.97
1	Q9H0W9	C11orf54	[R].IAEVGGVPYLLPLVNQK.[K]	Q9H0W9 [59-75]			0	1810.05																					-0.132676	-0.345866
1	Q9H0W9	C11orf54	[K].APLVCLPVFVSR.[D]	Q9H0W9 [245-256]	1xCarbamidomethyl [C5]		0	1357.77																					-0.122784	-0.0776467
2	P11021	HSPA5	[K].NQLTSNPENTVFDAK.[R]	P11021 [82-96]			0	1677.81	0.0135729											-0.161038		-0.457724		0.303166									0.0398019					-0.233707							1.15597			0.308982
2	P11021	HSPA5	[K].TKPYIQVDIGGGQTK.[T]	P11021 [124-138]			0	1604.86	-0.364128																		0.296413							0.408858
2	P11021	HSPA5	[K].DNHLLGTFDLTGIPPAPR.[G]	P11021 [475-492]			0	1934.01	0.203317		0.819505																	-0.321673																				0.101612
2	P11021	HSPA5	[K].SQIFSTASDNQPTVTIK.[V]	P11021 [448-464]			0	1836.93	-0.192166
2	P11021	HSPA5	[K].KELEEIVQPIISK.[L]	P11021 [621-633]			1	1525.88
2	P11021	HSPA5	[R].IINEPTAAAIAYGLDKR.[E]	P11021 [198-214]			1	1816	1.05631
2	P11021	HSPA5	[R].IEIESFYEGEDFSETLTR.[A]	P11021 [307-324]			0	2164.99
2	P11021	HSPA5	[K].IEWLESHQDADIEDFK.[A]	P11021 [602-617]			0	1974.91	-0.0889293	-1.91551																			-1.2256									-1.22853	-1.02104
2	P11021	HSPA5	[K].LYGSAGPPPTGEEDTAEKDEL.[-]	P11021 [634-654]			1	2175.99
2	P11021	HSPA5	[K].DAGTIAGLNVMR.[I]	P11021 [186-197]			0	1217.63																																-0.0445022
2	P11021	HSPA5	[K].VTHAVVTVPAYFNDAQR.[Q]	P11021 [165-181]			0	1887.97	-0.0349032																																						0.114446
2	P11021	HSPA5	[R].ITPSYVAFTPEGER.[L]	P11021 [61-74]			0	1566.78	-0.10702
2	P11021	HSPA5	[R].TWNDPSVQQDIK.[F]	P11021 [102-113]			0	1430.69	-0.0945103
2	P11021	HSPA5	[K].TFAPEEISAMVLTK.[M]	P11021 [139-152]			0	1536.8
2	P11021	HSPA5	[R].NELESYAYSLK.[N]	P11021 [563-573]			0	1316.64	-0.0918417
2	P11021	HSPA5	[K].SDIDEIVLVGGSTR.[I]	P11021 [354-367]			0	1460.76
2	P11021	HSPA5	[K].EDVGTVVGIDLGTTYSCVGVFK.[N]	P11021 [25-46]	1xCarbamidomethyl [C17]		0	2316.14
2	P11021	HSPA5	[K].ELEEIVQPIISK.[L]	P11021 [622-633]			0	1397.79																									-0.193611
2	P11021	HSPA5	[K].FEELNMDLFR.[S]	P11021 [327-336]			0	1313.62	-0.101588
2	P11021	HSPA5	[K].FEELNMDLFR.[S]	P11021 [327-336]	1xOxidation [M6]		0	1329.61
2	P11021	HSPA5	[K].KEDVGTVVGIDLGTTYSCVGVFK.[N]	P11021 [24-46]	1xCarbamidomethyl [C18]		1	2444.24
2	P11021	HSPA5	[K].KSDIDEIVLVGGSTR.[I]	P11021 [353-367]			1	1588.85	-0.0668487
2	P11021	HSPA5	[K].KTKPYIQVDIGGGQTK.[T]	P11021 [123-138]			1	1732.96
2	P11021	HSPA5	[K].EFFNGKEPSR.[G]	P11021 [377-386]			1	1210.59	-0.683665															1.6955														0.136615					0.586788					2.00423	0.612569
2	P11021	HSPA5	[K].ITITNDQNR.[L]	P11021 [524-532]			0	1074.55
2	P11021	HSPA5	[K].VYEGERPLTK.[D]	P11021 [465-474]			0	1191.64																					0.752719		-0.700973
2	P11021	HSPA5	[K].VLEDSDLKK.[S]	P11021 [345-353]			1	1046.57												-1.45425
2	P11021	HSPA5	[R].GVPQIEVTFEIDVNGILR.[V]	P11021 [493-510]			0	1999.09
2	P11021	HSPA5	[R].AKFEELNMDLFR.[S]	P11021 [325-336]			1	1512.75
2	P11021	HSPA5	[K].RALSSQHQAR.[I]	P11021 [297-306]			1	1153.62
3	P00441	SOD1	[R].HVGDLGNVTADKDGVADVSIEDSVISLSGDHCIIGR.[T]	P00441 [81-116]	1xCarbamidomethyl [C32]		1	3720.81	0.0348411						-0.807965		-0.762287	-0.766186	-0.161873	-0.351474	0.230461				-0.118408	-0.595056	-0.12038														0.0909883		-0.0266064						-0.026882
3	P00441	SOD1	[K].GLTEGLHGFHVHEFGDNTAGCTSAGPHFNPLSR.[K]	P00441 [38-70]	1xCarbamidomethyl [C21]		0	3519.62																	0.121851		-0.195419
3	P00441	SOD1	[K].DGVADVSIEDSVISLSGDHCIIGR.[T]	P00441 [93-116]	1xCarbamidomethyl [C20]		0	2514.21											-0.169846			-0.133781			-0.165903	-0.191642	-0.165642						0.633076
3	P00441	SOD1	[K].GDGPVQGIINFEQK.[E]	P00441 [11-24]			0	1501.76											-0.0381329	-0.00454534	-0.321641	-0.165085	-0.18327	-0.213893	-0.160602	-0.148082	-0.162313	-0.105071	-0.0573116			0.210362									-0.325982	0.596895
3	P00441	SOD1	[R].HVGDLGNVTADK.[D]	P00441 [81-92]			0	1225.62							0.299141					0.176161			-0.0735913		-0.125117	-0.0790664	-0.197972	-0.0144859		0.240487													0.0253297
3	P00441	SOD1	[R].LACGVIGIAQ.[-]	P00441 [145-154]	1xCarbamidomethyl [C3]		0	1001.54
4	A0A0U1RRH7	N/Ap	[KR].VTIAQGGVLPNIQAVLLPK.[K]	A0A0U1RRH7 [101-119]			0	1931.17	-0.128086				-0.561493	-0.324707	-0.348575				-0.0220558	-0.190999											0.132059
4	H0YHG0	N/Ap	[K].ITSEIPQTER.[M]	H0YHG0 [406-415]			0	1173.61
4	H3BNC9	N/Ap	[R].LGNDFHTNK.[R]	H3BNC9 [473-481]			0	1045.51	0.468357						-0.179168																																		-0.636423
4	H3BNC9	N/Ap	[K].LLDFGSLSNLQVTQPTVGMNFK.[T]	H3BNC9 [557-578]			0	2409.25	-0.121847
4	H3BNC9	N/Ap	[K].LLDFGSLSNLQVTQPTVGMNFK.[T]	H3BNC9 [557-578]	1xOxidation [M19]		0	2425.24
4	H3BNC9	N/Ap	[R].RDNYVPEVSALDQEIIEVDPDTK.[E]	H3BNC9 [530-552]			1	2645.29
4	H3BNC9	N/Ap	[R].DNYVPEVSALDQEIIEVDPDTK.[E]	H3BNC9 [531-552]			0	2489.19
4	J3KR12	N/Ap	[R].GFTAAGILSAHK.[I]	J3KR12 [18-29]			0	1172.64
4	H0YHG0	N/Ap	[K].GLSSDNKPMVNLDK.[L]	H0YHG0 [449-462]			0	1517.76
4	H0YHG0	N/Ap	[R].LQAYLEEHAEEEANEEDVLGDETEEEETKPIELPVKEEEPPEK.[T]	H0YHG0 [351-393]			1	4993.3
4	A0A096LPI6	N/Ap	[K].ITDLANLSAANHDAAIFPGGFGAAK.[N]	A0A096LPI6 [128-152]			0	2442.24														0.262108	0.804414											-0.498539						0.367759				0.0271379					0.624797
4	F5H423	N/Ap	[K].LGEIVTTIPTIGFNVETVEYK.[N]	F5H423 [39-59]			0	2323.24	-0.0271005
4	H3BNC9	N/Ap	[R].LGNDFHTNKR.[V]	H3BNC9 [473-482]			1	1201.61
4	A0A096LPI6	N/Ap	[R].GVEVTVGHEQEEGGKWPYAGTAEAIK.[A]	A0A096LPI6 [200-225]			1	2742.34														0.207076
4	F8VZ95	N/Ap	[K].EDLSGTQAGLNVIK.[E]	F8VZ95 [172-185]			0	1444.76
5	Q15717	ELAVL1	[R].SEAEEAITSFNGHKPPGSSEPITVK.[F]	Q15717 [158-182]			0	2612.28																																	-0.168608	-0.0126696
5	Q15717	ELAVL1	[R].TNLIVNYLPQNMTQDELR.[S]	Q15717 [20-37]			0	2162.09																									-0.722149					-0.0655891			-0.112455								-0.679044
5	Q15717	ELAVL1	[K].VAGHSLGYGFVNYVTAK.[D]	Q15717 [56-72]			0	1782.92																			-0.132373														0.122792
5	Q15717	ELAVL1	[R].SLFSSIGEVESAK.[L]	Q15717 [38-50]			0	1353.69
5	Q15717	ELAVL1	[R].VLVDQTTGLSR.[G]	Q15717 [137-147]			0	1188.66																									1.04542			0.182569	0.826145				0.01186						0.00840343
5	Q15717	ELAVL1	[K].RSEAEEAITSFNGHKPPGSSEPITVK.[F]	Q15717 [157-182]			1	2768.38																																	-0.102099
7	A0A0A0MRR7	SNRPC	[KR].FYCDYCDTYLTHDSPSVR.[K]	A0A0A0MRR7 [25-42]	2xCarbamidomethyl [C3; C6]		0	2298.94	0.00631421
8	E7EUC7	UGP2	[K].IQRPPEDSIQPYEK.[I]	E7EUC7 [87-100]			0	1699.86						0.0930138	0.163223				0.105506																0.627106				-0.268952	0.0396393			-0.246816	0.653013
8	E7EUC7	UGP2	[K].ILTTASSHEFEHTK.[K]	E7EUC7 [48-61]			0	1600.8							-1.48108																	0.0174099	0.715392			-1.23725												-2.01048
8	E7EUC7	UGP2	[R].NENTFLDLTVQQIEHLNK.[T]	E7EUC7 [143-160]			0	2156.1
8	E7EUC7	UGP2	[K].GTVIIIANHGDR.[I]	E7EUC7 [483-494]			0	1265.7
9	P62258	YWHAE	[K].AAFDDAIAELDTLSEESYK.[D]	P62258 [197-215]			0	2087.97	-0.0284628																												1.92608
9	P62258	YWHAE	[R].IISSIEQKEENK.[G]	P62258 [62-73]			1	1417.75
9	P62258	YWHAE	[K].LICCDILDVLDK.[H]	P62258 [95-106]	2xCarbamidomethyl [C3; C4]		0	1476.74	-0.0262421
9	P62258	YWHAE	[K].VAGMDVELTVEER.[N]	P62258 [30-42]			0	1447.71																																						0.271372
9	P62258	YWHAE	[K].VAGMDVELTVEER.[N]	P62258 [30-42]	1xOxidation [M4]		0	1463.7
9	P62258	YWHAE	[R].DNLTLWTSDMQGDGEEQNK.[E]	P62258 [226-244]	1xOxidation [M10]		0	2196.93																																									1.38824
9	P62258	YWHAE	[R].DNLTLWTSDMQGDGEEQNK.[E]	P62258 [226-244]			0	2180.94
9	P62258	YWHAE	[K].AASDIAMTELPPTHPIR.[L]	P62258 [154-170]			0	1819.94																								0.277192
9	P62258	YWHAE	[K].HLIPAANTGESK.[V]	P62258 [107-118]			0	1237.65						-0.13178						-1.68375						0.241231	0.641414	-0.0671824				-0.0072359		-0.322309								-0.277106	-1.36862
9	P62258	YWHAE	[K].LICCDILDVLDKHLIPAANTGESK.[V]	P62258 [95-118]	2xCarbamidomethyl [C3; C4]		1	2695.38	0.00202701
9	P62258	YWHAE	[K].AAFDDAIAELDTLSEESYKDSTLIMQLLR.[D]	P62258 [197-225]			1	3258.61
9	P62258	YWHAE	[R].YLAEFATGNDR.[K]	P62258 [131-141]			0	1256.59
10	Q00839	HNRNPU	[K].GNFTLPEVAECFDEITYVELQK.[E]	Q00839 [638-659]	1xCarbamidomethyl [C11]		0	2602.24								-0.0170291																								-0.0717585
10	Q00839	HNRNPU	[R].LQAALDDEEAGGRPAMEPGNGSLDLGGDSAGR.[S]	Q00839 [38-69]			0	3126.44
10	Q00839	HNRNPU	[K].YNILGTNTIMDK.[M]	Q00839 [525-536]			0	1382.7															0.294691							-0.013215				-0.274992
10	Q00839	HNRNPU	[K].EKPYFPIPEEYTFIQNVPLEDR.[V]	Q00839 [463-484]			0	2724.36	-0.0741121
10	Q00839	HNRNPU	[K].AEGGGGGGRPGAPAAGDGK.[T]	Q00839 [216-234]			0	1538.73																		-0.317135	-0.364867		0.153118					-0.881468	0.364387							0.0128436				-0.439527
10	Q00839	HNRNPU	[K].DLPEHAVLK.[M]	Q00839 [627-635]			0	1021.57						-0.248735			-0.330099					-0.18431			0.0832296												0.200935	-0.073784
10	Q00839	HNRNPU	[K].SSGPTSLFAVTVAPPGAR.[Q]	Q00839 [187-204]			0	1714.91
11	Q00796	SORD	[R].MHSVGICGSDVHYWEYGR.[I]	Q00796 [39-56]	1xCarbamidomethyl [C7]		0	2152.93																																					-0.279673
11	Q00796	SORD	[R].LENYPIPEPGPNEVLLR.[M]	Q00796 [22-38]			0	1950.03	-0.0215975							-0.614373										-0.0798138				-0.740816				0.136067	-0.178811							-0.119324		-0.0974296	-0.158542	-0.19417	-0.158351	-0.0883801	-0.230391
11	Q00796	SORD	[K].LPDNVTFEEGALIEPLSVGIHACR.[R]	Q00796 [143-166]	1xCarbamidomethyl [C23]		0	2637.33																																				-0.1825	-0.167859				-0.335227
11	Q00796	SORD	[K].AMGAAQVVVTDLSATR.[L]	Q00796 [194-209]	1xOxidation [M2]		0	1605.83
11	Q00796	SORD	[R].YNLSPSIFFCATPPDDGNLCR.[F]	Q00796 [111-131]	2xCarbamidomethyl [C10; C20]		0	2444.1																																				-0.124042	-0.1431	-0.04623	-0.127253	-0.106843	-0.65378
11	Q00796	SORD	[K].AMGAAQVVVTDLSATR.[L]	Q00796 [194-209]			0	1589.83
11	Q00796	SORD	[K].ALEAFETFKK.[G]	Q00796 [331-340]			1	1183.64
11	Q00796	SORD	[K].VLVCGAGPIGMVTLLVAK.[A]	Q00796 [176-193]	1xCarbamidomethyl [C4]		0	1798.03	0.0686386
11	Q00796	SORD	[K].KPMVLGHEASGTVEK.[V]	Q00796 [64-78]			0	1582.83
12	P84103	SRSF3	[K].VYVGNLGNNGNK.[T]	P84103 [12-23]			0	1248.63
12	P84103	SRSF3	[R].VRVELSNGEK.[R]	P84103 [76-85]			1	1130.62
12	P84103	SRSF3	[R].NPPGFAFVEFEDPRDAADAVR.[E]	P84103 [44-64]			1	2320.1																																						-0.120321	-0.287702
13	P67936	TPM4	[K].EENVGLHQTLDQTLNELNCI.[-]	P67936 [229-248]	1xCarbamidomethyl [C19]		0	2340.11
13	P67936	TPM4	[K].IQALQQQADEAEDR.[A]	P67936 [14-27]			0	1614.77																					-1.93131												-1.32542							-0.817841	-0.512148
13	P67936	TPM4	[K].YSEKEDKYEEEIK.[L]	P67936 [178-190]			2	1689.79
13	P67936; Q5TCU8	TPM4	[R].KLVILEGELER.[AS]	P67936 [132-142]; Q5TCU8 [168-178]			1	1298.77	0.396741																								0.351618
14	Q9BUJ2	HNRNPUL1	[K].QGAPTSFLPPEASQLKPDR.[Q]	Q9BUJ2 [147-165]			0	2039.06						-0.468204															-1.19944	-0.465814				-1.09867
14	Q9BUJ2	HNRNPUL1	[R].QNQFYDTQVIK.[Q]	Q9BUJ2 [107-117]			0	1383.69
15	Q8NCW5	APOA1BP; NAXE	[K].GLTVPIASIDIPSGWDVEK.[G]	Q8NCW5 [209-227]			0	1997.06																					-0.690684																			-0.0159041	-0.208427
15	Q8NCW5	APOA1BP; NAXE	[K].LFGYEPTIYYPK.[R]	Q8NCW5 [133-144]			0	1490.76																																									-0.111681
16	P05386; P05387	RPLP1	[K].KEESEESDDDMGFGLFD.[-]	P05386 [98-114]; P05387 [99-115]	1xOxidation [M11]		1	1965.75
16	P05386	RPLP1	[K].ALANVNIGSLICNVGAGGPAPAAGAAPAGGPAPSTAAAPAEEK.[K]	P05386 [50-92]	1xCarbamidomethyl [C12]		0	3808.93	-0.141486
16	P05386	RPLP1	[K].AAGVNVEPFWPGLFAK.[A]	P05386 [34-49]			0	1702.9	-0.0872816																				-0.78481
17	Q8N684	CPSF7	[K].AVSGASAGDYSDAIETLLTAIAVIK.[Q]	Q8N684 [355-379]			0	2436.29																					-0.609444							0.0533782
18	P55795	HNRNPH2	[R].VTGEADVEFATHEDAVAAMAK.[D]	P55795 [327-347]	1xOxidation [M19]		0	2178
18	P55795	HNRNPH2	[R].EGRPSGEAFVELESEEEVK.[L]	P55795 [50-68]			0	2121																					-0.410629																-0.0854817				-0.227569
19	Q9BX68	HINT2	[R].ISQAEEEDQQLLGHLLLVAK.[Q]	Q9BX68 [100-119]			0	2234.2																-0.205464				-0.0724734
19	Q9BX68	HINT2	[K].AQQATPGGAAPTIFSR.[I]	Q9BX68 [43-58]			0	1572.81	-1.18823																			-0.0898928
20	Q96HE7	ERO1L; ERO1A	[R].LGAVDESLSEETQK.[A]	Q96HE7 [137-150]			0	1505.73
20	Q96HE7	ERO1L; ERO1A	[K].IWNVIYEENCFKPQTIK.[R]	Q96HE7 [199-215]	1xCarbamidomethyl [C10]		0	2182.1								0.519185																0.035439									0.022074		0.0140087
20	Q96HE7	ERO1L; ERO1A	[K].YSEEANNLIEECEQAER.[L]	Q96HE7 [120-136]	1xCarbamidomethyl [C12]		0	2083.89																																			-0.00661798
20	Q96HE7	ERO1L; ERO1A	[K].VLPFFERPDFQLFTGNK.[I]	Q96HE7 [318-334]			0	2055.07																					-1.37995												0.0242271		-0.0742313
20	Q96HE7	ERO1L; ERO1A	[K].RPLNPLASGQGTSEENTFYSWLEGLCVEK.[R]	Q96HE7 [216-244]	1xCarbamidomethyl [C26]		0	3282.57	-0.134812
20	Q96HE7	ERO1L; ERO1A	[R].FDGILTEGEGPR.[R]	Q96HE7 [288-299]			0	1290.63																																	-0.129983		0.027435	-0.0607584		-0.313451
21	P34913	EPHX2	[R].AAVFDLDGVLALPAVFGVLGR.[T]	P34913 [5-25]			0	2100.19			0.162667		0.199247															-0.0354299
21	P34913	EPHX2	[R].YQIPALAQAGYR.[V]	P34913 [276-287]			0	1350.72																		0.85527		0.213033
22	Q15417	CNN3	[K].LTLQPVDNSTISLQMGTNK.[V]	Q15417 [233-251]	1xOxidation [M15]		0	2076.06					-0.679285	-0.599536			-0.305163		-0.310866				-0.181295			0.152251		0.226163	-0.0984558									-0.335053							-0.178713
22	Q15417	CNN3	[K].LTLQPVDNSTISLQMGTNK.[V]	Q15417 [233-251]			0	2060.07
22	Q15417	CNN3	[K].GFHTTIDIGVK.[Y]	Q15417 [133-143]			0	1187.64																				-0.655064						0.0655338
22	Q15417	CNN3	[K].YDHQAEEDLR.[N]	Q15417 [24-33]			0	1275.56	-0.106032						-0.236623												-0.000409967		-0.710911		0.771684				-0.107059														-0.158759
22	Q15417	CNN3	[K].KVNESSLNWPQLENIGNFIK.[A]	Q15417 [72-91]			1	2330.21
23	Q13268	DHRS2	[K].LQGEGLSVAGIVCHVGK.[A]	Q13268 [80-96]	1xCarbamidomethyl [C13]		0	1723.92	-0.0723412																-0.102584								-0.805324									1.49771
23	Q13268	DHRS2	[K].ALEHCGGVDFLVCSAGVNPLVGSTLGTSEQIWDK.[I]	Q13268 [107-140]	2xCarbamidomethyl [C5; C13]		0	3616.74	-0.440148
23	Q13268	DHRS2	[R].IGESEDCAGIVSFLCSPDASYVNGENIAVAGYSTR.[L]	Q13268 [245-279]	2xCarbamidomethyl [C7; C15]		0	3708.68		0.0246169
23	Q13268	DHRS2	[K].VFHGNESLWK.[N]	Q13268 [225-234]			0	1216.61	-0.0304608																								-1.86839													-0.701118
23	Q13268	DHRS2	[K].SPALLLSQLLPYMENR.[R]	Q13268 [148-163]			0	1844.99	-0.129871
23	Q13268	DHRS2	[R].VAVVTGSTSGIGFAIAR.[R]	Q13268 [38-54]			0	1605.9
23	Q13268	DHRS2	[R].VNCVVPGIIK.[T]	Q13268 [210-219]	1xCarbamidomethyl [C3]		0	1098.63
23	Q13268	DHRS2	[R].RGAVILVSSIAAYNPVVALGVYNVSK.[T]	Q13268 [164-189]			1	2660.51																													-0.475001
23	Q13268	DHRS2	[R].GAVILVSSIAAYNPVVALGVYNVSK.[T]	Q13268 [165-189]			0	2504.41
23	Q13268	DHRS2	[R].DGAHVVISSR.[K]	Q13268 [59-68]			0	1040.55																																	0.31275
23	Q13268	DHRS2	[K].AEDREQLVAK.[A]	Q13268 [97-106]			1	1158.61										-0.0944865				-0.068088
23	Q13268	DHRS2	[K].NFKEHHQLQR.[IQ]	Q13268 [235-244]			1	1336.69
23	Q13268	DHRS2	[K].SPALLLSQLLPYMENRR.[G]	Q13268 [148-164]			1	2001.09
23	Q13268	DHRS2	[K].SPALLLSQLLPYMENR.[R]	Q13268 [148-163]	1xOxidation [M13]		0	1860.99	-0.638367
23	Q13268	DHRS2	[K].SPALLLSQLLPYMENRR.[G]	Q13268 [148-164]	1xOxidation [M13]		1	2017.09
24	P46776	RPL27A	[K].TGAAPIIDVVR.[S]	P46776 [95-105]			0	1111.65								-0.0629739									-0.182509	-0.0983748	-0.170005	-0.116248	-0.0427388	-0.191005	-0.0264721	-0.0613237
25	P36957	DLST	[K].TPAFAESVTEGDVR.[W]	P36957 [75-88]			0	1478.71																		-0.12901	-0.144287
26	P57740	NUP107	[R].SGFGEISSPVIR.[E]	P57740 [4-15]			0	1248.66																			-0.533855
27	Q9UJC5	SH3BGRL2	[R].YCGDYDSFFESK.[E]	Q9UJC5 [75-86]	1xCarbamidomethyl [C2]		0	1517.59																		-0.163959		-0.140992
27	Q9UJC5	SH3BGRL2	[K].ESNTVFSFLGLKPR.[L]	Q9UJC5 [87-100]			0	1594.86																				0.0203819	-0.140838
27	Q9UJC5	SH3BGRL2	[K].KPTQGNPLPPQIFNGDR.[Y]	Q9UJC5 [58-74]			0	1878.98																	-0.230145	-0.490364	-0.154157	-0.101535	-0.252099
27	Q9UJC5	SH3BGRL2	[R].VFIASSSGFVAIK.[K]	Q9UJC5 [5-17]			0	1325.75																				-0.0986812
28	P53597	SUCLG1	[K].ISALQSAGVVVSMSPAQLGTTIYK.[E]	P53597 [315-338]			0	2421.31																																	-0.0320077
28	P53597	SUCLG1	[R].MGHAGAIIAGGK.[G]	P53597 [297-308]	1xOxidation [M1]		0	1098.57																														0.881026			-0.0302334			-0.761168
28	P53597	SUCLG1	[R].LIGPNCPGVINPGECK.[I]	P53597 [167-182]	2xCarbamidomethyl [C6; C15]		0	1724.85
28	P53597	SUCLG1	[K].GGQTHLGLPVFNTVK.[E]	P53597 [91-105]			0	1567.86	-0.213855																																0.0290729		-0.0178476	-0.749983
28	P53597	SUCLG1	[K].QGTFHSQQALEYGTK.[L]	P53597 [67-81]			0	1694.81																																	0.0216064
29	H0Y449	YBX1	[R].SVGDGETVEFDVVEGEK.[G]	H0Y449 [152-168]			0	1795.82		1.40575						-0.828865		-1.04061							-0.34857			-0.0576371					-0.174582	-0.117874	-0.274263			-0.241557	-0.458816								-0.280757
29	H0Y449	YBX1	[R].RPQYSNPPVQGEVMEGADNQGAGEQGRPVR.[Q]	H0Y449 [255-284]			0	3223.53
29	H0Y449	YBX1	[R].RPQYSNPPVQGEVMEGADNQGAGEQGRPVR.[Q]	H0Y449 [255-284]	1xOxidation [M14]		0	3239.52					0.0545259												-0.191852	0.715252			0.0558729																				-0.804258
29	H0Y449	YBX1	[K].EDVFVHQTAIKK.[N]	H0Y449 [132-143]			1	1414.77
29	H0Y449	YBX1	[R].EDGNEEDKENQGDETQGQQPPQR.[R]	H0Y449 [307-329]			1	2628.1																																									-0.31859
29	H0Y449	YBX1	[K].EDVFVHQTAIK.[KR]	H0Y449 [132-142]			0	1286.67
30	H3BMV3	JPT2	[K].GSGIFDESTPVQTR.[Q]	H3BMV3 [68-81]			0	1493.72
30	H3BMV3	JPT2	[K].DHVFLCEGEEPK.[S]	H3BMV3 [113-124]	1xCarbamidomethyl [C6]		0	1459.65
30	H3BMV3	JPT2	[R].MASNIFGPTEEPQNIPK.[R]	H3BMV3 [43-59]	1xOxidation [M1]		0	1888.91										0.0442914		0.224946					0.22263		-0.0599725							0.341354
31	O75368	SH3BGRL	[R].ENNAVYAFLGLTAPPGSK.[E]	O75368 [87-104]			0	1848.95																					-0.130972	-0.0466426
31	O75368	SH3BGRL	[K].KQQDVLGFLEANK.[I]	O75368 [19-31]			1	1489.8														-1.94922						-1.4899	-0.548501	-0.204314
31	O75368	SH3BGRL	[R].GDYDAFFEAR.[E]	O75368 [77-86]			0	1190.51
32	P14174	MIF	[R].VYINYYDMNAANVGWNNSTFA.[-]	P14174 [95-115]	1xOxidation [M8]		0	2443.07
32	P14174	MIF	[R].VYINYYDMNAANVGWNNSTFA.[-]	P14174 [95-115]			0	2427.07
32	P14174	MIF	[K].LLCGLLAER.[L]	P14174 [79-87]	1xCarbamidomethyl [C3]		0	1044.59	0.0230721														0.0943293	0.108082	0.0961573	-0.10793	0.123189	-0.0988243	-0.0689808	-0.077426				-0.044987
33	C9J8T6	COX17	[K].GEEHCGHLIEAHK.[E]	C9J8T6 [76-88]	1xCarbamidomethyl [C5]		0	1516.7									-0.10842	-0.067353		-0.0140415								-0.103715
34	Q15366; Q15365	PCBP2	[R].ESTGAQVQVAGDMLPNSTER.[A]	Q15366 [125-144]; Q15365 [125-144]	1xOxidation [M13]		0	2105.98
34	Q15366	PCBP2	[R].LVVPASQCGSLIGK.[G]	Q15366 [102-115]	1xCarbamidomethyl [C8]		0	1428.79	0.0645973																	-0.105542		-0.138096															-0.0398083
34	Q15366; Q15365	PCBP2	[R].INISEGNCPER.[I]	Q15366 [47-57]; Q15365 [47-57]	1xCarbamidomethyl [C8]		0	1288.6																											-0.629161	0.332823	-0.855907	-0.646793			-1.69003						-0.18592
34	Q15366; Q15365	PCBP2	[R].ESTGAQVQVAGDMLPNSTER.[A]	Q15366 [125-144]; Q15365 [125-144]			0	2089.98	-0.0222452							-0.588001											0.119433			-0.532925				0.332039	-0.689683	0.39934		-0.654481	-0.638807	-0.348284		0.791238	0.0948817
34	Q15366	PCBP2	[K].GVTIPYRPKPSSSPVIFAGGQDR.[Y]	Q15366 [177-199]			0	2429.29
35	A6NFY7	SDHAF1	[R].NPHDSTGAPETRPDGR.[-]	A6NFY7 [100-115]			0	1706.78																				-0.10446
36	Q96GC5	MRPL48	[K].MLLDSVLTTHER.[V]	Q96GC5 [144-155]	1xOxidation [M1]		0	1430.73																									0.294801				0.0112142			-0.266835	-0.890824					0.00640554
36	Q96GC5	MRPL48	[K].TIEVLQLQDQGSK.[M]	Q96GC5 [131-143]			0	1458.78															0.212907					-0.929985							-0.0747636				-0.0155335		0.231404		0.0177614	-0.247234
37	P61457	PCBD1	[K].LDHHPEWFNVYNK.[V]	P61457 [60-72]			0	1698.8																													0.575686	0.76254										-0.09449
37	P61457	PCBD1	[R].AVGWNELEGR.[D]	P61457 [22-31]			0	1130.56	-0.0328332																																							-0.111915	-0.0818904
37	P61457	PCBD1	[R].LSAEERDQLLPNLR.[A]	P61457 [8-21]			1	1653.89																																								0.520141
38	P30044	PRDX5	[K].ETDLLLDDSLVSIFGNR.[R]	P30044 [160-176]			0	1906.98																				-0.114335	-0.0782568
38	P30044	PRDX5	[K].ALNVEPDGTGLTCSLAPNIISQL.[-]	P30044 [192-214]	1xCarbamidomethyl [C13]		0	2383.22
38	P30044	PRDX5	[K].VGDAIPAVEVFEGEPGNK.[V]	P30044 [58-75]			0	1827.91																				-0.167199	-0.195477
38	P30044	PRDX5	[R].LLADPTGAFGK.[E]	P30044 [149-159]			0	1089.59	-0.0483184																			-0.0393371	-0.0598433	0.048665
38	P30044	PRDX5	[K].THLPGFVEQAEALK.[A]	P30044 [103-116]			0	1539.82	-0.0647809							-0.216705										0.295637		-0.125081	-0.117446	-0.066465					0.759255
38	P30044	PRDX5	[R].FSMVVQDGIVK.[A]	P30044 [181-191]	1xOxidation [M3]		0	1238.64																			-1.14992	-0.13968	-0.0569513										1.09512
38	P30044	PRDX5	[R].FSMVVQDGIVK.[A]	P30044 [181-191]			0	1222.65
38	P30044	PRDX5	[K].KGVLFGVPGAFTPGCSK.[T]	P30044 [86-102]	1xCarbamidomethyl [C15]		1	1721.9													-0.0490043							-0.495931	-0.0766817				-0.251082								-0.106464								-0.649427
38	P30044	PRDX5	[K].GVLFGVPGAFTPGCSK.[T]	P30044 [87-102]	1xCarbamidomethyl [C14]		0	1593.81																				-0.122581	-0.118817								0.140717
38	P30044	PRDX5	[K].RFSMVVQDGIVK.[A]	P30044 [180-191]	1xOxidation [M4]		1	1394.75																				-0.133138	0.0613767
39	P09668	CTSH	[K].NQGACGSCWTFSTTGALESAIAIATGK.[M]	P09668 [134-160]	2xCarbamidomethyl [C5; C8]		0	2759.28
39	P09668	CTSH	[K].VNHAVLAVGYGEK.[N]	P09668 [279-291]			0	1356.73																		-0.0806423		-0.097818		-0.151842
39	P09668	CTSH	[K].GIMGEDTYPYQGK.[D-]	P09668 [198-210]			0	1458.66																		-0.124886	-0.33642	-0.0601287		-0.273263
39	P09668	CTSH	[R].TGIYSSTSCHK.[T]	P09668 [264-274]	1xCarbamidomethyl [C9]		0	1240.56														-0.109091	0.676816			-0.00212933	-0.0757912	0.0597219		0.0543309
40	P10809	HSPD1	[R].RGVMLAVDAVIAELKK.[Q]	P10809 [142-157]			2	1713.01	-0.0459613
40	P10809	HSPD1	[K].RIQEIIEQLDVTTSEYEK.[E]	P10809 [370-387]			1	2194.12
40	P10809	HSPD1	[K].RIQEIIEQLDVTTSEYEKEK.[L]	P10809 [370-389]			2	2451.26	-0.0903017																																				0.346556	-0.202467	0.195863	-0.244721	-0.4038
40	P10809	HSPD1	[R].TALLDAAGVASLLTTAEVVVTEIPKEEK.[D]	P10809 [527-554]			1	2868.58	-0.100782															-0.105282																					0.327894		0.0875288
40	P10809	HSPD1	[R].TALLDAAGVASLLTTAEVVVTEIPK.[E]	P10809 [527-551]			0	2482.4
40	P10809	HSPD1	[K].KISSIQSIVPALEIANAHR.[K]	P10809 [250-268]			1	2047.17	-0.0318959
40	P10809	HSPD1	[R].KPLVIIAEDVDGEALSTLVLNR.[L]	P10809 [269-290]			0	2365.33	-0.0787961																			0.537553																	0.879439	0.0251637	0.222664
40	P10809	HSPD1	[K].ISSIQSIVPALEIANAHR.[K]	P10809 [251-268]			0	1919.07	-0.0660647												-0.17215	-0.264311				-0.191592		-0.142905	-0.226896			-0.191143	-0.246264	-0.249567		-0.217704	-0.234257	-0.415051		-0.231176	-0.314433	-0.26581	-0.245675	-0.283215	0.246695	-0.124759	0.0218731	-0.0703554	-0.236766
40	P10809	HSPD1	[K].LVQDVANNTNEEAGDGTTTATVLAR.[S]	P10809 [97-121]			0	2560.25	-0.127611
40	P10809	HSPD1	[R].IQEIIEQLDVTTSEYEK.[E]	P10809 [371-387]			0	2038.02			0.11631																			0.242737										-0.104101	-0.315993					-0.133656	0.230895		-0.706533
40	P10809	HSPD1	[R].IQEIIEQLDVTTSEYEKEK.[L]	P10809 [371-389]			1	2295.16	-0.0963608	0.0455347				-1.06546				0.739457																				-0.430099		1.00783		1.62665	1.10746	0.717031	-0.0170127	0.076694		0.209144	-0.0603498
40	P10809	HSPD1	[K].CEFQDAYVLLSEK.[K]	P10809 [237-249]	1xCarbamidomethyl [C1]		0	1601.75	-0.081197																																				0.363983	-0.0472805	0.158797	-0.188533
40	P10809	HSPD1	[R].AAVEEGIVLGGGCALLR.[C]	P10809 [430-446]	1xCarbamidomethyl [C13]		0	1684.91	-0.115655					0.438766	0.517122													-1.55909													-0.636999				0.426243	-0.0395111			-0.119004
40	P10809	HSPD1	[K].IMQSSSEVGYDAMAGDFVNMVEK.[G]	P10809 [494-516]			0	2508.11	-0.130626
40	P10809	HSPD1	[R].TVIIEQSWGSPK.[V]	P10809 [61-72]			0	1344.72					-1.1471	-1.24691		-0.765685					0.23672	-1.05118				-0.692491		-0.333529			-0.386154		0.33724	-0.163419	0.150136				-0.475767							0.212527			2.05009
40	P10809	HSPD1	[K].NAGVEGSLIVEK.[I]	P10809 [482-493]			0	1215.66																					-0.60048					0.390795			1.51619	0.631442							0.344772	-0.0790457		-0.212582
40	P10809	HSPD1	[K].VGGTSDVEVNEK.[K]	P10809 [406-417]			0	1233.6
40	P10809	HSPD1	[K].VGEVIVTKDDAMLLK.[G]	P10809 [345-359]			1	1630.91	-0.0507184
40	P10809	HSPD1	[R].CIPALDSLTPANEDQK.[I]	P10809 [447-462]	1xCarbamidomethyl [C1]		0	1771.85	-0.113043														1.47287				-0.609645		-0.194154										0.810016	0.076045
40	P10809	HSPD1	[K].DMAIATGGAVFGEEGLTLNLEDVQPHDLGK.[V]	P10809 [315-344]			0	3097.51
40	P10809	HSPD1	[R].GVMLAVDAVIAELKK.[Q]	P10809 [143-157]	1xOxidation [M3]		1	1572.9							-0.781355																															0.186457
40	P10809	HSPD1	[R].GYISPYFINTSK.[G]	P10809 [222-233]			0	1389.7																		-0.161205		-0.15122	-0.149798	-0.148122	-0.142232	-0.141151	-0.198513	-0.175975	-0.187446	-0.181911	-0.198367	-0.242174	-0.182782	-0.176175	-0.053675
40	P10809	HSPD1	[K].QSKPVTTPEEIAQVATISANGDK.[E]	P10809 [158-180]			0	2384.23						-0.4235
40	P10809	HSPD1	[K].QSKPVTTPEEIAQVATISANGDKEIGNIISDAMK.[K]	P10809 [158-191]			1	3555.82	-0.0852758
40	P10809	HSPD1	[K].KQSKPVTTPEEIAQVATISANGDKEIGNIISDAMK.[K]	P10809 [157-191]			2	3683.92	-0.170146
40	P10809	HSPD1	[R].GVMLAVDAVIAELKK.[Q]	P10809 [143-157]			1	1556.91	-0.0919012
41	Q9Y5K6	CD2AP	[K].APAPKPELIAAEK.[K]	Q9Y5K6 [347-359]			0	1334.77
41	Q9Y5K6	CD2AP	[K].EGEIIHLISK.[E]	Q9Y5K6 [292-301]			0	1138.65
41	Q9Y5K6	CD2AP	[K].YFSLKPEEK.[D]	Q9Y5K6 [361-369]			0	1140.59
41	Q9Y5K6	CD2AP	[K].ETDVVNFDDIASSENLLHLTANRPKMPGR.[R]	Q9Y5K6 [471-499]			1	3239.61
42	A6XMV9	PRSS2	[R].LGEHNIEVLEGNEQFINAAK.[I]	A6XMV9 [87-106]			0	2225.12
42	A6XMV9	PRSS2	[R].TLDNDILLIK.[L]	A6XMV9 [117-126]			0	1157.68
43	P61978; Q5T6W2	HNRNPK	[R].TDYNASVSVPDSSGPER.[I]	P61978 [70-86]; Q5T6W2 [70-86]			0	1780.8																																								0.57265
43	P61978	HNRNPK	[R].IITITGTQDQIQNAQYLLQNSVK.[Q]	P61978 [434-456]			0	2589.39	-0.0713223																				-0.606764			0.112398			0.0483751	-0.527549				-0.025706			-0.172163
43	P61978; Q5T6W2	HNRNPK	[R].ILSISADIETIGEILKK.[I]	P61978 [87-103]; Q5T6W2 [87-103]			1	1843.08	-0.0147578
43	P61978; Q5T6W2	HNRNPK	[R].ILSISADIETIGEILK.[K]	P61978 [87-102]; Q5T6W2 [87-102]			0	1714.98
43	P61978; Q5T6W2	HNRNPK	[R].GSYGDLGGPIITTQVTIPK.[D]	P61978 [378-396]; Q5T6W2 [354-372]			0	1917.03																							-0.0971189				0.0119398	-0.312959	0.786387	0.00626732	0.0523784	0.0531839	0.0363619	-0.25093	0.0555746	-0.631955					-0.208451
43	P61978; Q5T6W2	HNRNPK	[R].VVLIGGKPDRVVECIKIILDLISESPIK.[G]	P61978 [192-219]; Q5T6W2 [168-195]	1xCarbamidomethyl [C14]		2	3103.82	-0.0497908
43	P61978	HNRNPK	[K].IDEPLEGSEDR.[I]	P61978 [423-433]			0	1259.58																					-0.722836							-0.429761		-0.0307568	-0.154563	-0.140003	-2.53907		-0.106467	-0.745961
43	Q5T6W2	HNRNPK	[K].IIPTLEEYQHYK.[G]	Q5T6W2 [104-115]			0	1533.79
43	P61978	HNRNPK	[K].IIPTLEEGLQLPSPTATSQLPLESDAVECLNYQHYK.[G]	P61978 [104-139]	1xCarbamidomethyl [C29]		0	4055.03	-0.0579794
43	P61978; Q5T6W2	HNRNPK	[R].LLIHQSLAGGIIGVK.[G]	P61978 [149-163]; Q5T6W2 [125-139]			0	1518.94	-0.0171872																																		-0.387638				-0.305274
43	P61978; Q5T6W2	HNRNPK	[K].RPAEDMEEEQAFK.[R]	P61978 [22-34]; Q5T6W2 [22-34]			0	1579.71							-0.183746		-0.166629												-1.46261						-0.407865
43	P61978; Q5T6W2	HNRNPK	[K].RPAEDMEEEQAFK.[R]	P61978 [22-34]; Q5T6W2 [22-34]	1xOxidation [M6]		0	1595.7					-0.454791		-0.218045
43	P61978; Q5T6W2	HNRNPK	[K].RPAEDMEEEQAFKR.[S]	P61978 [22-35]; Q5T6W2 [22-35]			1	1735.81
43	P61978; Q5T6W2	HNRNPK	[K].RPAEDMEEEQAFKR.[S]	P61978 [22-35]; Q5T6W2 [22-35]	1xOxidation [M6]		1	1751.8
43	P61978; Q5T6W2	HNRNPK	[K].LFQECCPHSTDR.[V]	P61978 [180-191]; Q5T6W2 [156-167]	2xCarbamidomethyl [C5; C6]		0	1549.65							0.421701																																	-1.3505
43	P61978; Q5T6W2	HNRNPK	[R].VVLIGGKPDR.[V]	P61978 [192-201]; Q5T6W2 [168-177]			0	1053.64
43	P61978; Q5T6W2	HNRNPK	[K].IILDLISESPIK.[G]	P61978 [208-219]; Q5T6W2 [184-195]			0	1340.8
44	O75884	RBBP9	[R].VYAIVLVSAYTSDLGDENER.[A]	O75884 [90-109]			0	2214.09												-0.0875522																													-0.0400923
44	O75884	RBBP9	[K].TIIIGHSSGAIAAMR.[Y]	O75884 [69-83]			0	1497.82												-0.109184														0.0979949
44	O75884	RBBP9	[K].ANCPYIVQFGSTDDPFLPWK.[E]	O75884 [125-144]	1xCarbamidomethyl [C3]		0	2355.11	-0.16152											-0.148068
44	O75884	RBBP9	[K].FTDCGHFQNTEFHELITVVK.[S]	O75884 [160-179]	1xCarbamidomethyl [C4]		0	2422.15							-0.0370628	0.221755				-0.106795
44	O75884	RBBP9	[R].ESIWLPFMETELHCDEK.[T]	O75884 [52-68]	1xCarbamidomethyl [C14]		0	2163.97												-0.169559
44	O75884	RBBP9	[K].EQQEVADRLETK.[L]	O75884 [145-156]			1	1445.72												-0.120228		0.663345					-0.109188	-0.418184		-0.327156									-0.171272								-0.146131	0.726549
45	A0A2R8Y5S7; E7EQR4	RDX	[K].IGFPWSEIR.[N]	A0A2R8Y5S7 [238-246]; E7EQR4 [238-246]			0	1104.58	-0.0121226
45	A0A2R8Y5S7; E7EQR4	RDX	[R].RKPDTIEVQQMK.[A]	A0A2R8Y5S7 [295-306]; E7EQR4 [295-306]			1	1472.79
45	A0A2R8Y5S7	RDX	[R].IQNWHEEHR.[G]	A0A2R8Y5S7 [172-180]			0	1248.59
45	A0A2R8Y5S7	RDX	[K].QLQALSSELAQAR.[D]	A0A2R8Y5S7 [527-539]			0	1414.76
45	A0A2R8Y5S7	RDX	[K].AFAAQEDLEK.[T]	A0A2R8Y5S7 [449-458]			0	1121.55
46	O43175	PHGDH	[K].NAGNCLSPAVIVGLLK.[E]	O43175 [365-380]	1xCarbamidomethyl [C5]		0	1625.9
47	Q9NR45	NANS	[K].GSDHSASLEPGELAELVR.[S]	Q9NR45 [247-264]			0	1866.92	-0.00800682
47	Q9NR45	NANS	[K].VGSGDTNNFPYLEK.[T]	Q9NR45 [132-145]			0	1540.73
47	Q9NR45	NANS	[K].QVYQIVKPLNPNFCFLQCTSAYPLQPEDVNLR.[V]	Q9NR45 [167-198]	2xCarbamidomethyl [C14; C18]		0	3851.92	0.0237444
47	Q9NR45	NANS	[R].HLEFSHDQYR.[E]	Q9NR45 [87-96]			0	1331.61																																									0.254436
47	Q9NR45	NANS	[R].WVGGQHPCFIIAEIGQNHQGDLDVAK.[R]	Q9NR45 [12-37]	1xCarbamidomethyl [C8]		0	2889.41	0.00414407
48	P60709; P68032	ACTB	[K].IWHHTFYNELR.[V]	P60709 [85-95]; P68032 [87-97]			0	1515.75	-0.00315193
48	P60709	ACTB	[R].VAPEEHPVLLTEAPLNPK.[A]	P60709 [96-113]			0	1954.06	-0.0903944							-0.72138	-0.521837		-1.04843		-1.15319		-0.998775			-0.546546																	-0.226278
48	P60709	ACTB	[R].CPEALFQPSFLGMESCGIHETTFNSIMK.[C]	P60709 [257-284]	2xCarbamidomethyl [C1; C16]		0	3231.46	-0.0966845
48	P60709; P68032	ACTB	[R].AVFPSIVGRPR.[HQ]	P60709 [29-39]; P68032 [31-41]			0	1198.71	-0.19037					-0.44541	-0.531911	-0.626131	-0.412359		-0.604838	-0.443561				-0.0248579	-0.0833973	-0.0951363	0.190711	-0.278333	-0.196283	-0.344673			-0.0819621	-0.2293	-0.344574	-0.276378	-0.280225	-0.0890675	-0.21668	0.00235461	-0.116721	-0.335944	-0.0831108	-0.352298	-0.266275	-0.148541	-0.236277	-0.305645	-0.104662
48	P60709	ACTB	[K].DLYANTVLSGGTTMYPGIADR.[M]	P60709 [292-312]	1xOxidation [M14]		0	2231.06	-0.0140732
48	P60709	ACTB	[K].DLYANTVLSGGTTMYPGIADR.[M]	P60709 [292-312]			0	2215.07	-0.0046283	-0.231059
48	P60709; P68032	ACTB	[K].AGFAGDDAPRAVFPSIVGRPR.[HQ]	P60709 [19-39]; P68032 [21-41]			1	2156.14										-0.688028												-0.490563						0.475066				-0.171837	-0.142489		-0.277753
48	P60709	ACTB	[R].KDLYANTVLSGGTTMYPGIADR.[M]	P60709 [291-312]			1	2343.16	-0.0631626																								0.516271									0.277868	1.44066
48	P60709	ACTB	[K].QEYDESGPSIVHRK.[C]	P60709 [360-373]			1	1644.8
48	P60709	ACTB	[R].CPEALFQPSFLGMESCGIHETTFNSIMK.[C]	P60709 [257-284]	2xCarbamidomethyl [C1; C16]; 1xOxidation [M27]		0	3247.46	-0.144338
48	P60709	ACTB	[K].QEYDESGPSIVHR.[K]	P60709 [360-372]			0	1516.7							-0.476214		-0.442557	-0.369567		-0.380579			-0.16088										-0.00631848															-0.110234
49	Q14739	LBR	[K].YKDGTELELK.[E]	Q14739 [41-50]			1	1195.62
49	Q14739	LBR	[K].ENDIKPLTSFR.[Q]	Q14739 [51-61]			0	1319.7
50	E7EVA0	MAP4	[K].RDFIATLEAEAFDDVVGETVGK.[T]	E7EVA0 [23-44]			1	2382.18										0.0888551						0.373496
50	E7EVA0	MAP4	[K].ATPMPSRPSTTPFIDKKPTSAKPSSTTPR.[L]	E7EVA0 [2036-2064]			1	3084.61
50	E7EVA0	MAP4	[K].ATPMPSRPSTTPFIDK.[K]	E7EVA0 [2036-2051]			0	1745.89	-0.591418																								0.0799991	-1.01729		-0.358073							-0.024772	-0.245011
50	E7EVA0	MAP4	[K].KPTSAKPSSTTPR.[L]	E7EVA0 [2052-2064]			0	1357.74																										-0.279002		-0.298691					0.0303596		0.0967987
50	E7EVA0	MAP4	[K].TTTLSGTAPAAGVVPSR.[V]	E7EVA0 [2017-2033]			0	1585.85
50	E7EVA0	MAP4	[K].VGSLDNVGHLPAGGAVK.[TI]	E7EVA0 [2216-2232]			0	1590.86
50	E7EVA0	MAP4	[K].KTKPLATTQPAK.[T]	E7EVA0 [1845-1856]			1	1283.77
50	E7EVA0	MAP4	[R].VPPELLGGSPPWK.[T]	E7EVA0 [715-727]			0	1376.76
50	E7EVA0	MAP4	[K].HVPGGGNVQIQNK.[K]	E7EVA0 [2161-2173]			0	1347.71																							-0.626837	-0.159138								-0.371718	-0.150915		-0.304826
50	E7EVA0	MAP4	[K].TEGKPAEVKK.[M]	E7EVA0 [1984-1993]			1	1086.62
51	Q01518	CAP1	[K].AGAAPYVQAFDSLLAGPVAEYLK.[I]	Q01518 [38-60]			0	2351.23	-0.124649	-0.110791						0.28469							0.0566703							-0.431259	-0.452388	-0.310374				-0.0892501	-0.465495	-0.141471		-0.192854	-0.180459		-0.148419			-0.126929	-0.365014	-0.0983393	-0.190285
51	Q01518	CAP1	[K].LSDLLAPISEQIK.[E]	Q01518 [101-113]			0	1426.82																														-0.193882			-0.213567						-0.224621
51	Q01518	CAP1	[K].SSEMNVLIPTEGGDFNEFPVPEQFK.[T]	Q01518 [434-458]			0	2811.32	-0.169217
51	Q01518	CAP1	[K].HAEMVHTGLK.[L]	Q01518 [72-81]	1xOxidation [M4]		0	1138.57
51	Q01518	CAP1	[R].VENQENVSNLVIEDTELK.[Q]	Q01518 [331-348]			0	2073.03
52	P07900; P08238	HSP90AA1	[K].HNDDEQYAWESSAGGSFTVR.[TA]	P07900 [154-173]; P08238 [149-168]			0	2255.96
52	P07900; P08238	HSP90AA1	[K].SLTNDWEDHLAVK.[H]	P07900 [315-327]; P08238 [307-319]			0	1527.74	-0.0250968
52	P07900; P08238	HSP90AA1	[R].TLTIVDTGIGMTK.[A]	P07900 [88-100]; P08238 [83-95]			0	1349.73	-0.0309946
52	P07900	HSP90AA1	[R].NPDDITNEEYGEFYK.[S]	P07900 [300-314]			0	1833.78	-0.0586694
52	P07900	HSP90AA1	[K].CLELFTELAEDKENYKK.[F]	P07900 [420-436]	1xCarbamidomethyl [C1]		2	2130.04	-0.0481642									-0.00610335					0.342557									-0.635272																	0.0183545
52	P07900	HSP90AA1	[K].KHLEINPDHSIIETLR.[Q]	P07900 [632-647]			1	1915.04	-0.058447
52	P07900	HSP90AA1	[K].HSQFIGYPITLFVEK.[KE]	P07900 [210-224]			0	1778.95	0.148873
52	P07900; P08238	HSP90AA1	[K].ADLINNLGTIAK.[SF]	P07900 [101-112]; P08238 [96-107]			0	1242.71	-0.0334238
52	P07900; P08238; Q12931	HSP90AA1	[R].GVVDSEDLPLNISR.[E]	P07900 [387-400]; P08238 [379-392]; Q12931 [389-402]			0	1513.79	-0.0352299																								0.782411			0.989514
52	P07900; P08238	HSP90AA1	[K].HFSVEGQLEFR.[A]	P07900 [328-338]; P08238 [320-330]			0	1348.66
52	P07900	HSP90AA1	[K].HLEINPDHSIIETLR.[Q]	P07900 [633-647]			0	1786.94	-0.0149307																								-0.166076
52	P07900	HSP90AA1	[K].CLELFTELAEDKENYK.[K]	P07900 [420-435]	1xCarbamidomethyl [C1]		1	2001.95
52	P07900	HSP90AA1	[K].HGLEVIYMIEPIDEYCVQQLK.[E]	P07900 [514-534]	1xCarbamidomethyl [C16]		0	2577.27
52	P07900; P08238	HSP90AA1	[K].EGLELPEDEEEKK.[KI]	P07900 [547-559]; P08238 [539-551]			1	1544.73
52	P07900	HSP90AA1	[R].RAPFDLFENR.[K]	P07900 [346-355]			1	1264.64
52	P07900	HSP90AA1	[R].VFIMDNCEELIPEYLNFIR.[G]	P07900 [368-386]	1xCarbamidomethyl [C7]		0	2415.17	0.0997803
52	P07900	HSP90AA1	[R].VFIMDNCEELIPEYLNFIR.[G]	P07900 [368-386]	1xCarbamidomethyl [C7]; 1xOxidation [M4]		0	2431.17	-0.215665
52	P07900	HSP90AA1	[K].ELHINLIPNK.[Q]	P07900 [75-84]			0	1190.69	-0.0429485
53	A0A0B4J2C3	TPT1	[R].EIADGLCLEVEGK.[M]	A0A0B4J2C3 [22-34]	1xCarbamidomethyl [C7]		0	1432.7
53	A0A0B4J2C3	TPT1	[K].IREIADGLCLEVEGK.[M]	A0A0B4J2C3 [20-34]	1xCarbamidomethyl [C9]		1	1701.88																										-0.643437								-0.319626						-0.666723
53	A0A0B4J2C3	TPT1	[R].TEGNIDDSLIGGNASAEGPEGEGTESTVITGVDIVMNHHLQETSFTK.[E]	A0A0B4J2C3 [39-85]			0	4857.26																																				0.395385
53	A0A0B4J2C3	TPT1	[R].TEGNIDDSLIGGNASAEGPEGEGTESTVITGVDIVMNHHLQETSFTK.[E]	A0A0B4J2C3 [39-85]	1xOxidation [M36]		0	4873.26	-0.110666																																				-0.22066
53	A0A0B4J2C3	TPT1	[R].DLISHDEMFSDIYK.[I]	A0A0B4J2C3 [6-19]			0	1712.78
54	Q14353	GAMT	[R].YYAFPQMITPLVTK.[G]	Q14353 [222-235]	1xOxidation [M7]		0	1687.88
54	Q14353	GAMT	[R].TEVMALVPPADCR.[Y]	Q14353 [209-221]	1xCarbamidomethyl [C12]		0	1458.71
55	O14979	HNRNPDL; HNRPDL	[R].RGFCFITYTDEEPVKK.[L]	O14979 [274-289]	1xCarbamidomethyl [C4]		2	1989.97
55	O14979	HNRNPDL; HNRPDL	[K].KDLTEYLSR.[F]	O14979 [162-170]			1	1124.59
56	K7ELL7	PRKCSH	[R].VNDGVCDCCDGTDEYNSGVICENTCK.[E]	K7ELL7 [92-117]	5xCarbamidomethyl [C6; C8; C9; C21; C25]		0	3041.13
56	K7ELL7	PRKCSH	[K].LWEEQLAAAK.[A]	K7ELL7 [197-206]			0	1158.62	-0.177613
56	K7ELL7	PRKCSH	[K].SLEDQVEMLR.[T]	K7ELL7 [168-177]			0	1219.6
56	K7ELL7	PRKCSH	[K].SLEDQVEMLR.[T]	K7ELL7 [168-177]	1xOxidation [M8]		0	1235.59	0.277687
56	K7ELL7	PRKCSH	[K].DGSDEPGTAACPNGSFHCTNTGYKPLYIPSNR.[V]	K7ELL7 [60-91]	2xCarbamidomethyl [C11; C18]		0	3483.53
56	K7ELL7	PRKCSH	[R].GVSLTNHHFYDESKPFTCLDGSATIPFDQVNDDYCDCK.[D]	K7ELL7 [22-59]	3xCarbamidomethyl [C18; C35; C37]		0	4452.91
56	K7ELL7	PRKCSH	[K].AQQEQELAADAFK.[E]	K7ELL7 [207-219]			0	1448.7	-0.0688647																								-0.986566
56	K7ELL7	PRKCSH	[K].LIELQAGKK.[S]	K7ELL7 [159-167]			1	999.62
57	P07437	TUBB	[K].FWEVISDEHGIDPTGTYHGDSDLQLDR.[I]	P07437 [20-46]			0	3102.41	-0.0642116																																				-0.649452		-0.0619163		-0.0256746
57	P07437; P68371	TUBB	[K].LTTPTYGDLNHLVSATMSGVTTCLR.[F]	P07437 [217-241]; P68371 [217-241]	1xCarbamidomethyl [C23]		0	2708.34	-0.0199779
57	P07437; P68371	TUBB	[K].GHYTEGAELVDSVLDVVR.[K]	P07437 [104-121]; P68371 [104-121]			0	1958.98	0.0150128																													-0.167762
57	P07437; P68371	TUBB	[R].SGPFGQIFRPDNFVFGQSGAGNNWAK.[G]	P07437 [78-103]; P68371 [78-103]			0	2798.34	-0.0497519
57	P07437; P68371	TUBB	[R].EIVHLQAGQCGNQIGAK.[FLA]	P07437 [3-19]; P68371 [3-19]	1xCarbamidomethyl [C10]		0	1822.92
57	P07437; P68371	TUBB	[K].EAESCDCLQGFQLTHSLGGGTGSGMGTLLISK.[I]	P07437 [123-154]; P68371 [123-154]	2xCarbamidomethyl [C5; C7]		0	3311.53	-0.0523889
57	P07437; P68371	TUBB	[R].KEAESCDCLQGFQLTHSLGGGTGSGMGTLLLSK.[I]	P07437 [122-154]; P68371 [122-154]	2xCarbamidomethyl [C6; C8]		1	3439.63	-0.0112924
57	P07437; P68371	TUBB	[K].NSSYFVEWIPNNVK.[TV]	P07437 [337-350]; P68371 [337-350]			0	1696.83	-0.00147549
57	P07437; P68371	TUBB	[R].LHFFMPGFAPLTSR.[G]	P07437 [263-276]; P68371 [263-276]			0	1620.84	-0.0205043
58	Q9UMX0	UBQLN1	[K].EKEEFAVPENSSVQQFK.[E]	Q9UMX0 [46-62]			1	1995.97								-0.500788																		0.0995001	-0.262463			-0.154562	-0.149349				-0.217364
58	Q9UMX0	UBQLN1	[K].EEFAVPENSSVQQFK.[E]	Q9UMX0 [48-62]			0	1738.83
58	Q9UMX0	UBQLN1	[K].DQDTLSQHGIHDGLTVHLVIK.[T]	Q9UMX0 [87-107]			0	2326.21																											-0.0739664				-0.186938
59	F5H2F4	MTHFD1	[K].YVVVTGITPTPLGEGK.[S]	F5H2F4 [427-442]			0	1630.91	-0.13707
59	F5H2F4	MTHFD1	[K].IYGADDIELLPEAQHK.[A]	F5H2F4 [889-904]			0	1811.92	-0.0594744
60	P58546	LUZP6; MTPN	[K].GADINAPDKHHITPLLSAVYEGHVSCVK.[L]	P58546 [58-85]	1xCarbamidomethyl [C26]		1	3028.53
61	P02768	ALB	[K].RMPCAEDYLSVVLNQLCVLHEK.[T]	P02768 [469-490]	2xCarbamidomethyl [C4; C17]		1	2674.31																													0.0529248	0.0473666		-0.211455	-0.517359		-0.321092
61	P02768	ALB	[K].SHCIAEVENDEMPADLPSLAADFVESK.[D]	P02768 [311-337]	1xCarbamidomethyl [C3]		0	2974.34	-0.243519																												-0.214727			-0.393667	-0.461183		-0.897357
61	P02768	ALB	[K].EFNAETFTFHADICTLSEK.[E]	P02768 [525-543]	1xCarbamidomethyl [C14]		0	2260.02																													0.0115315	-0.01625			-0.287346		-0.322374	0.271831
61	P02768	ALB	[K].KVPQVSTPTLVEVSR.[N]	P02768 [438-452]			1	1639.94																													0.0331574	0.0332257	-0.166689	-0.20511	-0.32635		-0.321448	-0.356766		-0.710311	-0.627105
61	P02768	ALB	[R].LVRPEVDVMCTAFHDNEETFLK.[K]	P02768 [139-160]	1xCarbamidomethyl [C10]		0	2650.26					-0.465927																					0.0311652			0.00828531	-0.0704696		0.173861	-0.365334	-0.6316	-0.544989
61	P02768	ALB	[K].ALVLIAFAQYLQQCPFEDHVK.[L]	P02768 [45-65]	1xCarbamidomethyl [C14]		0	2490.28																													0.597173	0.615074		0.299849	0.25916		0.383093
61	P02768	ALB	[K].VHTECCHGDLLECADDR.[A]	P02768 [265-281]	3xCarbamidomethyl [C5; C6; C13]		0	2086.84																													-0.0709353	0.0124031		-0.14721			-0.222619
61	P02768	ALB	[K].VFDEFKPLVEEPQNLIK.[Q]	P02768 [397-413]			0	2045.1	-0.194469																												0.0193064	0.0141724		-0.172518	-0.359929	-0.344643	-0.319827					-0.250211
61	P02768	ALB	[K].LVNEVTEFAK.[T]	P02768 [66-75]			0	1149.62
61	P02768	ALB	[K].LKECCEKPLLEK.[S]	P02768 [299-310]	2xCarbamidomethyl [C4; C5]		1	1546.8
61	P02768	ALB	[K].YICENQDSISSK.[L]	P02768 [287-298]	1xCarbamidomethyl [C3]		0	1443.64
61	P02768	ALB	[K].TCVADESAENCDK.[S]	P02768 [76-88]	2xCarbamidomethyl [C2; C11]		0	1498.58																													-0.103968
61	P02768	ALB	[K].SHCIAEVENDEMPADLPSLAADFVESK.[D]	P02768 [311-337]	1xCarbamidomethyl [C3]; 1xOxidation [M12]		0	2990.34																																-0.430593
61	P02768	ALB	[K].SLHTLFGDK.[L]	P02768 [89-97]			0	1017.54																													0.0891356	-0.013052		-0.205167	-0.20854		-0.0427302
61	P02768	ALB	[K].VHTECCHGDLLECADDRADLAK.[Y]	P02768 [265-286]	3xCarbamidomethyl [C5; C6; C13]		1	2585.12																													-0.0282621	-0.435852		-0.268126	-0.407174
61	P02768	ALB	[R].RHPDYSVVLLLR.[L]	P02768 [361-372]			1	1467.84																													0.127906	0.138714		-0.106751	-0.222868
61	P02768	ALB	[K].QNCELFEQLGEYK.[F]	P02768 [414-426]	1xCarbamidomethyl [C3]		0	1657.75																					0.0781916								-0.0577556	-0.0817878		-0.281507	-0.333515	-0.458839	-0.358671
61	P02768	ALB	[K].CCAAADPHECYAK.[V]	P02768 [384-396]	3xCarbamidomethyl [C1; C2; C10]		0	1552.6
61	P02768	ALB	[K].AVMDDFAAFVEK.[C]	P02768 [570-581]			0	1342.63																													-0.0825059			-0.290418
61	P02768	ALB	[R].FKDLGEENFK.[A]	P02768 [35-44]			1	1226.61																								1.06928		-0.121809			-0.0241116			-0.247807	-2.4325
61	P02768	ALB	[K].KYLYEIAR.[R]	P02768 [161-168]			1	1055.59
61	P02768	ALB	[K].LDELRDEGK.[A]	P02768 [206-214]			1	1074.54
61	P02768	ALB	[K].KQTALVELVK.[H]	P02768 [549-558]			1	1128.7																													0.0679574	0.0407989		-0.13637	-0.300223		-0.164936
61	P02768	ALB	[K].LVAASQAALGL.[-]	P02768 [599-609]			0	1013.6
61	P02768	ALB	[R].LVRPEVDVMCTAFHDNEETFLK.[K]	P02768 [139-160]	1xCarbamidomethyl [C10]; 1xOxidation [M9]		0	2666.26		-0.979897				-0.725907									0.276715							0.0478422					-0.361588	0.350595	0.301537	-0.0854442		-0.299204						0.176477
61	P02768	ALB	[K].QTALVELVK.[H]	P02768 [550-558]			0	1000.6																													-0.00820958	-0.068375		-0.111833	-0.245711
61	P02768	ALB	[K].QEPERNECFLQHK.[D]	P02768 [118-130]	1xCarbamidomethyl [C8]		1	1714.8
61	P02768	ALB	[K].ECCEKPLLEK.[S]	P02768 [301-310]	2xCarbamidomethyl [C2; C3]		0	1305.62										-0.273078																			0.00819184
61	P02768	ALB	[R].ETYGEMADCCAK.[Q]	P02768 [106-117]	2xCarbamidomethyl [C9; C10]		0	1434.53
61	P02768	ALB	[R].MPCAEDYLSVVLNQLCVLHEK.[T]	P02768 [470-490]	2xCarbamidomethyl [C3; C16]		0	2518.21																			-0.384917													-0.294007
61	P02768	ALB	[K].AAFTECCQAADK.[A]	P02768 [187-198]	2xCarbamidomethyl [C6; C7]		0	1371.57							0.0445957																		0.179133				-0.0340616	0.056862			-0.32597
61	P02768	ALB	[R].NECFLQHK.[D]	P02768 [123-130]	1xCarbamidomethyl [C3]		0	1075.5
62	Q06323	PSME1	[R].IEDGNNFGVAVQEK.[V]	Q06323 [142-155]			0	1519.74																					-0.193024	-0.254185	-0.267327	-0.206158	-0.248539	-0.217686	-0.0905731	-0.262467		-0.209947	-0.192298		-0.27467		-0.106822	-0.251492		-0.128218	0.646975	-0.16502	-0.239659
62	Q06323	PSME1	[K].ISELDAFLKEPALNEANLSNLK.[A]	Q06323 [37-58]			1	2429.29
62	Q06323	PSME1	[R].LKPEIKDVIEQLNLVTTWLQLQIPR.[I]	Q06323 [117-141]			1	2987.73
62	Q06323	PSME1	[K].VFELMTSLHTK.[L]	Q06323 [156-166]			0	1305.69	-0.124246																												-0.120531	-0.121448		-0.222215	-0.250227		-0.17528
62	Q06323	PSME1	[K].TENLLGSYFPK.[K]	Q06323 [25-35]			0	1268.65	-0.0435293																				-0.168696				-0.0903982	-0.240539	-0.281634	-0.0820931	-0.191747	-0.234535	-0.13999	-0.0855514	-0.190324		-0.0798058		0.0958105	-0.0740828	-0.113181	-0.0605302	-0.0475538
62	Q06323	PSME1	[R].QLVHELDEAEYR.[D]	Q06323 [199-210]			0	1501.73	-0.711771										-1.42169				-1.20408						-0.53614					-0.373808			-0.143183	-0.569366	-0.585157		-0.246126	-1.01032	-1.19519	-1.07728		-0.170022		-0.88647	-0.830087
62	Q06323	PSME1	[K].EPALNEANLSNLK.[A]	Q06323 [46-58]			0	1412.74															-0.483974						-0.24776				-0.269655	-0.139676	-0.215266	-0.245932	-0.276728	-0.346576	-0.256959	-0.217225	-0.192595				-0.251915
62	Q06323	PSME1	[K].KGEDEDKGPPCGPVNCNEK.[I]	Q06323 [91-109]	2xCarbamidomethyl [C11; C16]		2	2129.92																					-0.211338	-0.354166				-0.225039			-0.118138	-0.23084	-0.217857		-0.256871		-0.232541		-0.292493		-0.483664
62	Q06323	PSME1	[K].APLDIPVPDPVK.[E]	Q06323 [59-70]			0	1260.72																					-0.204798	-0.153927			-0.338128	-0.114844	-0.266197	-0.163778	-0.298555	-0.284352	-0.294624	-0.0546675	-0.332688		-0.321213
62	Q06323	PSME1	[K].APLDIPVPDPVKEK.[E]	Q06323 [59-72]			1	1517.86																					-0.195926				-0.352379	-0.370869	-0.146604	-0.243669	-0.19864	-0.240932	-0.168254	-0.238373	-0.231392		-0.276974	-0.269936	-0.225581	-0.222471	-0.245045	-0.273013	-0.165708
62	Q06323	PSME1	[K].VDVFREDLCTK.[T]	Q06323 [14-24]	1xCarbamidomethyl [C9]		1	1381.68																					-0.0778				0.621028										-0.0660634			0.0556787
62	Q06323	PSME1	[K].LEGFHTQISK.[Y]	Q06323 [167-176]			0	1159.61												1.7118									-0.177079				-1.22569			-0.296153	-0.13433	-0.120935	-0.12304	-0.143982		-0.0230106	-0.120681
63	Q12904	AIMP1	[R].KHPDADSLYVEEVDVGEIAPR.[T]	Q12904 [167-187]			1	2339.15					-0.0521114			-0.177621	-0.395267		-0.294139	-0.161981		0.101025	0.580374		-0.293907	-0.33632	-0.325675	-0.318585		-0.338939													-0.100265	-0.636688		-0.991238		-0.774469
63	Q12904	AIMP1	[K].IWEQIQPDLHTNDECVATYK.[G]	Q12904 [270-289]	1xCarbamidomethyl [C15]		0	2460.15
63	Q12904	AIMP1	[R].ITFDAFPGEPDKELNPK.[K]	Q12904 [251-267]			1	1917.96					-0.078844	-0.0534612																													-0.185225
63	Q12904	AIMP1	[R].TVVSGLVNHVPLEQMQNR.[M]	Q12904 [188-205]	1xOxidation [M15]		0	2037.05
63	Q12904	AIMP1	[R].MVILLCNLKPAK.[M]	Q12904 [206-217]	1xCarbamidomethyl [C6]		0	1399.82	0.202453																																		-0.0707082
63	Q12904	AIMP1	[R].TVVSGLVNHVPLEQMQNR.[M]	Q12904 [188-205]			0	2021.06																																			-0.123121						-0.051266
63	Q12904	AIMP1	[R].ITFDAFPGEPDK.[E]	Q12904 [251-262]			0	1336.64																																			-0.225783
64	F8W703	ROBO2	[R].GDVLPPVPGQGDKTATMLSDGAIYSSIDFTTK.[T]	F8W703 [951-982]	1xOxidation [M17]		1	3297.62												-0.566333						-0.871537			-0.62149																	-1.58036	-1.92911	-1.99308	-1.8075
65	O95486	SEC24A	[K].LSRDGAFLMDAGSVLMLWVGK.[N]	O95486 [978-998]	1xOxidation [M16]		1	2282.17		-0.173082	-0.0446633	0.0336214		-0.144681				-0.252669		0.121029			-1.5779		-0.0588477			1.10998				0.155657																	-1.0103
66	P13639	EEF2	[K].STAISLFYELSENDLNFIK.[Q]	P13639 [72-90]			0	2204.11	-0.016194												0.109052			0.291438			0.0561045																				-0.42036
66	P13639	EEF2	[R].GHVFEESQVAGTPMFVVK.[A]	P13639 [768-785]			0	1961.98	0.0455624		0.561483								1.02896				1.85156													0.662552
66	P13639	EEF2	[K].ARPFPDGLAEDIDKGEVSAR.[Q]	P13639 [606-625]			1	2143.08
66	P13639	EEF2	[R].YVEPIEDVPCGNIVGLVGVDQFLVK.[T]	P13639 [457-481]	1xCarbamidomethyl [C10]		0	2759.43	-0.0443422
66	P13639	EEF2	[R].SNTGGQAFPQCVFDHWQILPGDPFDNSSRPSQVVAETR.[K]	P13639 [802-839]	1xCarbamidomethyl [C11]		0	4244.98
66	P13639	EEF2	[K].TGTITTFEHAHNMR.[V]	P13639 [482-495]			0	1615.76	-0.0940215															-1.26854						-1.15925									0.108658		1.3117
66	P13639	EEF2	[R].RWLPAGDALLQMITIHLPSPVTAQK.[Y]	P13639 [342-366]			1	2756.53	0.0371751
66	P13639	EEF2	[K].AYLPVNESFGFTADLR.[S]	P13639 [786-801]			0	1799.9
66	P13639	EEF2	[K].EGIPALDNFLDKL.[-]	P13639 [846-858]			1	1444.77	-0.0642366																																					-0.730812	-0.871395
66	P13639	EEF2	[R].ETVSEESNVLCLSK.[S]	P13639 [581-594]	1xCarbamidomethyl [C11]		0	1594.76	0.215838									0.310816	-0.463176																											-0.779377	-0.601139	-0.378276
66	P13639	EEF2	[K].KEDLYLKPIQR.[T]	P13639 [439-449]			1	1402.81	0.0333801
66	P13639	EEF2	[R].ALLELQLEPEELYQTFQR.[I]	P13639 [163-180]			0	2220.15	-0.0272854	0.777924											0.0268803							0.482868														0.947739
66	P13639	EEF2	[R].WLPAGDALLQMITIHLPSPVTAQK.[Y]	P13639 [343-366]			0	2600.43	-0.056047
66	P13639	EEF2	[R].VFSGLVSTGLK.[V]	P13639 [416-426]			0	1107.64	0.129959
66	P13639	EEF2	[K].IWCFGPDGTGPNILTDITK.[G]	P13639 [649-667]	1xCarbamidomethyl [C3]		0	2105.04	0.0028835
66	P13639	EEF2	[K].TGTITTFEHAHNMR.[V]	P13639 [482-495]	1xOxidation [M13]		0	1631.76
66	P13639	EEF2	[K].DLEEDHACIPIKK.[S]	P13639 [560-572]	1xCarbamidomethyl [C8]		1	1567.78
66	P13639	EEF2	[R].TFCQLILDPIFK.[V]	P13639 [288-299]	1xCarbamidomethyl [C3]		0	1494.8	0.00652931
66	P13639	EEF2	[K].LDSEDKDKEGKPLLK.[A]	P13639 [323-337]			2	1714.92
66	P13639	EEF2	[K].DGAGFLINLIDSPGHVDFSSEVTAALR.[V]	P13639 [94-120]			0	2801.41
67	Q04828	AKR1C1	[K].LWCNSHRPELVRPALER.[S]	Q04828 [85-101]	1xCarbamidomethyl [C3]		0	2133.11	0.00243938
68	P30837	ALDH1B1	[K].TFPTVNPTTGEVIGHVAEGDR.[A]	P30837 [53-73]			0	2197.09	-0.464306						-0.260612	0.873031		0.508921	-0.0685421	-0.275047	0.201704					-0.330015	-0.381588	-0.159154	-0.0774044	-0.379429	-0.390529		0.408055				-0.223242	-0.0891049	-0.355977
68	P30837	ALDH1B1	[K].VAFTGSTEVGHLIQK.[A]	P30837 [258-272]			0	1586.85											0.0428345	0.0603038	0.0854126					-0.0272258	0.0863029	0.0220978	0.0309487	0.0574199		-0.0769318	-0.336812	-0.125735				-0.0335609					-0.203008
68	P30837	ALDH1B1	[K].VAEQTPLSALYLASLIK.[E]	P30837 [210-226]			0	1817.04											-0.0602135	-0.0348719								0.00677909	-0.0209568	0.0972383
68	P30837	ALDH1B1	[K].VGNPFELDTQQGPQVDK.[E]	P30837 [348-364]			0	1871.91								-0.657864			0.0400233									0.246598	-0.034475		-0.129868			0.0503424				0.129348
68	P30837	ALDH1B1	[K].VGNPFELDTQQGPQVDKEQFER.[V]	P30837 [348-369]			1	2561.23											0.0118664	0.118958	0.340781		0.0601169			0.192262		-0.0315107		-0.386869									0.575909
68	P30837	ALDH1B1	[R].VLGYIQLGQK.[E]	P30837 [370-379]			0	1118.66	-0.118754										0.0721782									0.0502571		0.0255592
68	P30837	ALDH1B1	[K].EEIFGPVQPLFK.[F]	P30837 [415-426]			0	1403.76
68	P30837	ALDH1B1	[K].TIPMDGQHFCFTR.[H]	P30837 [160-172]	1xCarbamidomethyl [C10]		0	1609.72											0.0217	0.0453832	0.267159
69	Q9Y2S2	CRYL1	[K].QCIVAHPVNPPYYIPLVELVPHPETAPTTVDR.[T]	Q9Y2S2 [140-171]	1xCarbamidomethyl [C2]		0	3622.87																		0.106534									-0.207363	-0.145429			-0.694215
69	Q9Y2S2	CRYL1	[K].HVLQTFGPIPEFSR.[A]	Q9Y2S2 [261-274]			0	1627.86																											-0.122597			-0.112168	-0.180489
69	Q9Y2S2	CRYL1	[R].LQYAIISEAWR.[L]	Q9Y2S2 [198-208]			0	1349.72																											-0.0999177	-0.160696			-0.0172852
69	Q9Y2S2	CRYL1	[K].IFAQLDSIIDDR.[V]	Q9Y2S2 [105-116]			0	1405.73																											-0.181936	-0.127253				-0.0860053
69	Q9Y2S2	CRYL1	[K].VPDDPEHLAAR.[R]	Q9Y2S2 [288-298]			0	1219.61																												-0.0876084			0.187862
69	Q9Y2S2	CRYL1	[K].LYDIEQQQIR.[N]	Q9Y2S2 [34-43]			0	1305.68																											-0.127814	-0.0644723			-0.0708828			-0.175816
69	Q9Y2S2	CRYL1	[K].EVAGFVLNR.[L]	Q9Y2S2 [189-197]			0	1004.55																											-0.0937129				0.0436636
70	A0A2U3TZU2	GPI	[R].VWYVSNIDGTHIAK.[T-]	A0A2U3TZU2 [220-233]			0	1602.83	0.0129078																								1.16409
70	A0A2U3TZU2	GPI	[K].IEPELDGSAQVTSHDASTNGLINFIK.[Q]	A0A2U3TZU2 [564-589]			0	2756.37																									-0.0441192
70	A0A2U3TZU2	GPI	[K].ILLANFLAQTEALMR.[G]	A0A2U3TZU2 [463-477]			0	1703.95	0.0500698																-0.0605033
70	A0A2U3TZU2	GPI	[R].SNTPILVDGKDVMPEVNK.[V]	A0A2U3TZU2 [146-163]			1	1956.01	-0.208011					0.10506
70	A0A2U3TZU2	GPI	[K].TFTTQETITNAETAK.[E]	A0A2U3TZU2 [251-265]			0	1655.81
70	A0A2U3TZU2	GPI	[K].TLAQLNPESSLFIIASK.[T]	A0A2U3TZU2 [234-250]			0	1832.02
70	A0A2U3TZU2	GPI	[R].RLFDANKDR.[F]	A0A2U3TZU2 [67-75]			2	1134.6							0.324784												0.925567		-0.00276315						-0.310322
70	A0A2U3TZU2	GPI	[K].KIEPELDGSAQVTSHDASTNGLINFIK.[Q]	A0A2U3TZU2 [563-589]			1	2884.47
70	A0A2U3TZU2	GPI	[R].VDHQTGPIVWGEPGTNGQHAFYQLIHQGTK.[M]	A0A2U3TZU2 [410-439]			0	3315.63
70	A0A2U3TZU2	GPI	[K].MIPCDFLIPVQTQHPIR.[K]	A0A2U3TZU2 [440-456]	1xCarbamidomethyl [C4]		0	2065.07
70	A0A2U3TZU2	GPI	[K].TITDVINIGIGGSDLGPLMVTEALKPYSSGGPR.[V]	A0A2U3TZU2 [187-219]			0	3328.75
70	A0A2U3TZU2	GPI	[K].VFEGNRPTNSIVFTK.[L]	A0A2U3TZU2 [506-520]			0	1708.9
70	A0A2U3TZU2	GPI	[K].HFVALSTNTTK.[V]	A0A2U3TZU2 [281-291]			0	1218.65										1.85115
70	A0A2U3TZU2	GPI	[K].NLVTEDVMR.[M]	A0A2U3TZU2 [97-105]			0	1076.54	-0.0827616
70	A0A2U3TZU2	GPI	[K].TITDVINIGIGGSDLGPLMVTEALKPYSSGGPR.[V]	A0A2U3TZU2 [187-219]	1xOxidation [M19]		0	3344.74
71	O75369	FLNB	[K].FNDEHIPESPYLVPVIAPSDDAR.[R]	O75369 [2266-2288]			0	2581.26	-0.0271761																													0.00601882			-0.275937		-0.224744
71	O75369	FLNB	[K].VTASGPGLSSYGVPASLPVDFAIDAR.[D]	O75369 [1520-1545]			0	2547.31
71	O75369	FLNB	[R].LVSPGSANETSSILVESVTR.[S]	O75369 [2476-2495]			0	2046.07
71	O75369	FLNB	[R].IGNLQTDLSDGLR.[L]	O75369 [37-49]			0	1401.73	0.155271																			0.13066												-0.220168
71	O75369	FLNB	[K].LGSAADFLLDISETDLSSLTASIK.[A]	O75369 [1920-1943]			0	2467.28
71	O75369	FLNB	[K].YRGQHVTGSPFQFTVGPLGEGGAHK.[V]	O75369 [2171-2195]			1	2627.31						0.998448											0.187577													-0.413941			-0.181789		0.114414
71	O75369	FLNB	[K].YGGPNHIVGSPFK.[A]	O75369 [2456-2468]			0	1372.7	-0.344583							-0.0777441																				-0.0698618		0.137659	0.0730536	-0.0307556	-0.180891		-0.11836
71	O75369	FLNB	[K].YGGELVPHFPAR.[V]	O75369 [1208-1219]			0	1342.69
71	O75369	FLNB	[K].SPFTVGVAAPLDLSK.[I]	O75369 [932-946]			0	1501.83															1.36186
71	O75369	FLNB	[R].VEVGKDQEFTVDTR.[G]	O75369 [956-969]			1	1622.8
71	O75369	FLNB	[R].DAGEGLLAVQITDQEGKPK.[R]	O75369 [1546-1564]			0	1969.02
71	O75369	FLNB	[R].EATTDFTVDSRPLTQVGGDHIK.[A]	O75369 [1246-1267]			0	2387.18
71	O75369	FLNB	[K].DLDIIDNYDYSHTVK.[Y]	O75369 [895-909]			0	1810.85	-0.11953
71	O75369	FLNB	[K-].FADEHVPGSPFTVK.[I]	O75369 [2075-2088]			0	1530.76													0.0331916																-0.0542772	0.0231925	-0.0324255	0.0235854									0.799709
71	O75369	FLNB	[K].HVGNQQYNVTYVVK.[E]	O75369 [2563-2576]			0	1648.84																													-0.14382	-0.0298534
71	O75369	FLNB	[K].ERGDYVLAVK.[W]	O75369 [2577-2586]			1	1149.63
71	O75369	FLNB	[K].VLFASQEIPASPFR.[V]	O75369 [823-836]			0	1561.84					0.206372											-0.147993						0.517342										-0.961638	-0.136595
71	O75369	FLNB	[R].AWGPGLHGGIVGR.[S]	O75369 [554-566]			0	1276.69
71	O75369	FLNB	[K].WGEEHIPGSPFHVTVP.[-]	O75369 [2587-2602]			0	1788.87
71	O75369	FLNB	[K].VTVLFAGQHISK.[S]	O75369 [329-340]			0	1299.74
71	O75369	FLNB	[K].SSFLVDCSK.[A]	O75369 [2531-2539]	1xCarbamidomethyl [C7]		0	1042.49
71	O75369	FLNB	[K].VVASGPGLEHGK.[V]	O75369 [1136-1147]			0	1150.62
71	O75369	FLNB	[K].ALGALVDSCAPGLCPDWESWDPQKPVDNAR.[E]	O75369 [170-199]	2xCarbamidomethyl [C9; C14]		0	3324.54	-0.113057
72	O95394	PGM3	[R].VYAEADSQESADHLAHEVSLAVFQLAGGIGERPQPGF.[-]	O95394 [506-542]			0	3895.89	-0.148315
72	O95394	PGM3	[K].EAVNLQQDAFVVIGR.[D]	O95394 [113-127]			0	1658.89
73	P06132	UROD	[R].AAQDFFSTCR.[S]	P06132 [51-60]	1xCarbamidomethyl [C9]		0	1202.53
73	P06132	UROD	[R].SPEACCELTLQPLR.[R]	P06132 [61-74]	2xCarbamidomethyl [C5; C6]		0	1673.8
74	Q9Y490	TLN1	[K].GTEWVDPEDPTVIAENELLGAAAAIEAAAK.[K]	Q9Y490 [2292-2321]			0	3051.52
74	Q9Y490	TLN1	[R].EGISQEALHTQMLTAVQEISHLIEPLANAAR.[A]	Q9Y490 [1691-1721]			0	3370.74	0.00418412
75	P38646	HSPA9	[K].SQVFSTAADGQTQVEIK.[V]	P38646 [469-485]			0	1808.9																									0.591879										0.0230334	-0.119064	-0.20485		0.0657052
75	P38646	HSPA9	[K].STNGDTFLGGEDFDQALLR.[H]	P38646 [266-284]			0	2055.96	-0.0826448																																	-0.0382136		-1.02322				-0.491328
75	P38646	HSPA9	[K].MEEFKDQLPADECNK.[L]	P38646 [596-610]	1xCarbamidomethyl [C13]		1	1853.8
75	P38646	HSPA9	[R].VEAVNMAEGIIHDTETK.[M]	P38646 [579-595]			0	1856.91	-0.0438729	0.37877						0.594022							-0.203481	0.101625									0.149509	-0.25065	-0.524621					0.426892	0.311625	-0.0606537	0.0474462		0.0267486		-0.0132947		-0.494722
75	P38646	HSPA9	[K].VQQTVQDLFGR.[A]	P38646 [395-405]			0	1290.68	-0.0722416									0.179054											-0.376733			-0.312627	-0.10525		1.14565		0.199801	0.0978852		0.00574493		0.0339898	-0.0157593	-0.0345569	0.0473478	-0.0836465	-0.00476073	0.0415695	0.0861885
75	P38646	HSPA9	[R].TTPSVVAFTADGER.[L]	P38646 [86-99]			0	1450.72	-0.140379																																	-0.137729	0.0445037	-0.00321627	-0.0243695	-0.0661964	-0.0597727		-0.196698
75	P38646	HSPA9	[R].VINEPTAAALAYGLDKSEDK.[V]	P38646 [219-238]			1	2105.08
75	P38646	HSPA9	[R].VINEPTAAALAYGLDK.[S]	P38646 [219-234]			0	1645.88																																	-0.133509	-0.0703642	-0.029793	-0.114614
75	P38646	HSPA9	[K].NAVITVPAYFNDSQR.[Q]	P38646 [188-202]			0	1694.85																									-0.0725998		0.922757		-0.08809	0.403251		-0.57576	0.0150533	-0.0174071	-0.0167669		-0.221897		-0.252487	-0.313125	-0.240502
75	P38646	HSPA9	[K].RQAVTNPNNTFYATK.[R]	P38646 [107-121]			1	1724.87
75	P38646	HSPA9	[K].SDIGEVILVGGMTR.[M]	P38646 [378-391]			0	1446.76
75	P38646	HSPA9	[R].QAVTNPNNTFYATK.[R]	P38646 [108-121]			0	1568.77
75	P38646	HSPA9	[K].DAGQISGLNVLR.[V]	P38646 [207-218]			0	1242.68																																	-0.144693		0.000740502	0.0160192		0.0719904	-0.0698503
75	P38646	HSPA9	[R].ASNGDAWVEAHGK.[L]	P38646 [147-159]			0	1341.62
75	P38646	HSPA9	[K].ETAENYLGHTAK.[N]	P38646 [176-187]			0	1333.64
75	P38646	HSPA9	[R].AQFEGIVTDLIR.[R]	P38646 [349-360]			0	1361.74	-0.147837																																	-0.0425604		0.0112187
75	P38646	HSPA9	[K].LLGQFTLIGIPPAPR.[G]	P38646 [499-513]			0	1592.95																																		0.027553	-0.120459	0.105077	0.0230883	-0.0601654	-0.106652	-0.179076	0.0396896
75	P38646	HSPA9	[R].RYDDPEVQK.[D]	P38646 [127-135]			1	1149.55
76	P42765	ACAA2	[K].TNVNGGAIALGHPLGGSGSR.[I]	P42765 [341-360]			0	1834.95
76	P42765	ACAA2	[K].KDGTVTAGNASGVADGAGAVIIASEDAVK.[K]	P42765 [241-269]			1	2644.34
76	P42765	ACAA2	[K].AANDAGYFNDEMAPIEVK.[T]	P42765 [192-209]	1xOxidation [M12]		0	1970.88																																									-0.253202
76	P42765	ACAA2	[K].DGTVTAGNASGVADGAGAVIIASEDAVK.[K]	P42765 [242-269]			0	2516.25																							0.0778803																0.0930029
76	P42765	ACAA2	[K].VSPETVDSVIMGNVLQSSSDAIYLAR.[H]	P42765 [46-71]	1xOxidation [M11]		0	2767.38									-0.0154591																																0.233039
76	P42765	ACAA2	[K].VSPETVDSVIMGNVLQSSSDAIYLAR.[H]	P42765 [46-71]			0	2751.39
76	P42765	ACAA2	[K].QTMQVDEHARPQTTLEQLQK.[L]	P42765 [215-234]	1xOxidation [M3]		0	2397.18
76	P42765	ACAA2	[K].DFTATDLSEFAAK.[A]	P42765 [26-38]			0	1415.67																																									-0.0752224
76	P42765	ACAA2	[K].EAEVVLCGGTESMSQAPYCVR.[N]	P42765 [110-130]	2xCarbamidomethyl [C7; C19]		0	2343.04
76	P42765	ACAA2	[K].DMDLVEVNEAFAPQYLAVER.[S]	P42765 [313-332]	1xOxidation [M2]		0	2325.11
76	P42765	ACAA2	[K].DMDLVEVNEAFAPQYLAVER.[S]	P42765 [313-332]			0	2309.11		-0.234112																		-0.40841							0.0450913		-0.281331			-0.351483
76	P42765	ACAA2	[R].ITAHLVHELR.[R]	P42765 [361-370]			0	1188.68
76	P42765	ACAA2	[K].RTPFGAYGGLLK.[D]	P42765 [14-25]			1	1279.72
76	P42765	ACAA2	[R].TPFGAYGGLLK.[D]	P42765 [15-25]			0	1123.61
77	A0A087WUZ3	SPTBN1	[K].DDEEMNTWIQAISSAISSDK.[H]	A0A087WUZ3 [2293-2312]			0	2240
77	A0A087WUZ3	SPTBN1	[R].AQTLPTSVVTITSESSPGK.[R]	A0A087WUZ3 [2328-2346]			0	1903					0.448268	-0.789903															-0.397082				0.515019
77	A0A087WUZ3	SPTBN1	[R].LNDGNEYLFQAK.[D]	A0A087WUZ3 [2281-2292]			0	1411.69																									0.773692			-0.075326
77	A0A087WUZ3	SPTBN1	[R].VDTVNHLADELINSGHSDAATIAEWK.[D]	A0A087WUZ3 [1757-1782]			0	2806.36	-0.0918062
77	A0A087WUZ3	SPTBN1	[K].TAASGIPYHSEVPVSLK.[E]	A0A087WUZ3 [2244-2260]			0	1755.93							0.437256																											-0.128685
77	A0A087WUZ3	SPTBN1	[K].TALPAQSAATLPAR.[T]	A0A087WUZ3 [2180-2193]			0	1367.76
77	A0A087WUZ3	SPTBN1	[R].WDVDDWDNENSSAR.[L]	A0A087WUZ3 [25-38]			0	1708.68
77	A0A087WUZ3	SPTBN1	[K].HQILEQAVEDYAETVHQLSK.[T]	A0A087WUZ3 [1636-1655]			0	2338.17	-0.0897625
78	A0A0G2JIW1	HSPA1B	[K].QTQIFTTYSDNQPGVLIQVYEGER.[A]	A0A0G2JIW1 [425-448]			0	2786.36					0.146094				0.728482																0.0638022									-0.340146		-0.0242971	-0.143817	0.0724864	-0.221767	-0.177306
78	A0A0G2JIW1	HSPA1B	[R].IINEPTAAAIAYGLDR.[TR]	A0A0G2JIW1 [173-188]			0	1687.9															0.0595155						-0.257857											-0.189536	-0.287038	-0.214999		-0.220736	-0.132518	-0.255689	-0.117759	-0.300654	-0.044561
78	A0A0G2JIW1; P11142; P11021; E9PK54	HSPA1B	[KR].VEIIANDQGNR.[TI]	A0A0G2JIW1 [27-37]; P11142 [26-36]; P11021 [50-60]; E9PK54 [26-36]			0	1228.63
78	A0A0G2JIW1	HSPA1B	[K].AAAIGIDLGTTYSCVGVFQHGK.[GV]	A0A0G2JIW1 [5-26]	1xCarbamidomethyl [C14]		0	2265.13																																			-0.152164	0.00972864	-0.0384318		-0.0217719
78	A0A0G2JIW1	HSPA1B	[K].LLQDFFNGR.[D]	A0A0G2JIW1 [350-358]			0	1109.57	0.0978178																																-0.109071	-0.0796285	-0.103933	0.0590969	-0.00637832		-0.375206	-0.0723106
78	A0A0G2JIW1; P11142; E9PK54	HSPA1B	[R].TTPSYVAFTDTER.[L]	A0A0G2JIW1 [38-50]; P11142 [37-49]; E9PK54 [37-49]			0	1487.7	-0.0177675																																-0.104249	0.200825	-0.0616747	-0.0777019	-0.175669	-0.103403	-0.152673	-0.0894118	-0.116989
78	A0A0G2JIW1	HSPA1B	[K].NQVALNPQNTVFDAK.[R]	A0A0G2JIW1 [58-72]			0	1658.85	-0.053797																															-0.0881327	-0.240159	-0.0833309	-0.129036	-0.0953856	-0.132129	-0.159377	-0.0863299	-0.111328
78	A0A0G2JIW1	HSPA1B	[K].DAGVIAGLNVLR.[I]	A0A0G2JIW1 [161-172]			0	1197.69
78	A0A0G2JIW1	HSPA1B	[K].CQEVISWLDANTLAEKDEFEHK.[R]	A0A0G2JIW1 [575-596]	1xCarbamidomethyl [C1]		1	2662.25	-0.134179																													-0.0127651		0.0661513				-0.210147
78	A0A0G2JIW1	HSPA1B	[K].ATAGDTHLGGEDFDNR.[L]	A0A0G2JIW1 [222-237]			0	1675.73							-1.03103																												-0.0553689		-0.208448		-0.235952	-0.160283	-0.156375
78	A0A0G2JIW1	HSPA1B	[R].ARFEELCSDLFR.[S]	A0A0G2JIW1 [301-312]	1xCarbamidomethyl [C7]		1	1542.74
78	A0A0G2JIW1	HSPA1B	[K].ELEQVCNPIISGLYQGAGGPGPGGFGAQGPK.[G]	A0A0G2JIW1 [599-629]	1xCarbamidomethyl [C6]		0	3055.49																																		-0.239091		0.126536
78	A0A0G2JIW1	HSPA1B	[R].FEELCSDLFR.[S]	A0A0G2JIW1 [303-312]	1xCarbamidomethyl [C5]		0	1315.6	0.0231687																																			-0.136422	-0.133323		-0.222129	-0.389068	-0.105014
78	A0A0G2JIW1	HSPA1B	[K].HWPFQVINDGDKPK.[V]	A0A0G2JIW1 [90-103]			0	1680.85	-0.0197204										1.36986				-0.0677416		-0.047668															-0.167455	-0.15648	0.0169186	-0.0904975	0.129782	0.140736				1.09184
78	A0A0G2JIW1	HSPA1B	[K].AFYPEEISSMVLTKMKEIAEAYLGYPVTNAVITVPAYFNDSQR.[Q]	A0A0G2JIW1 [114-156]			2	4856.42
78	A0A0G2JIW1	HSPA1B	[K].AQIHDLVLVGGSTR.[I]	A0A0G2JIW1 [330-343]			0	1465.81																																	-0.110691	-0.126857	-0.120058	-0.123102	-0.113166			-0.179598
78	A0A0G2JIW1	HSPA1B	[R].LVNHFVEEFK.[R]	A0A0G2JIW1 [238-247]			0	1261.66
78	A0A0G2JIW1	HSPA1B	[K].MKEIAEAYLGYPVTNAVITVPAYFNDSQR.[Q]	A0A0G2JIW1 [128-156]			1	3260.63	-0.0846904
78	A0A0G2JIW1	HSPA1B	[K].FGDPVVQSDMK.[H]	A0A0G2JIW1 [79-89]	1xOxidation [M10]		0	1238.57																																				-0.0551036
78	A0A0G2JIW1	HSPA1B	[K].FGDPVVQSDMK.[H]	A0A0G2JIW1 [79-89]			0	1222.58
78	A0A0G2JIW1	HSPA1B	[K].SENVQDLLLLDVAPLSLGLETAGGVMTALIK.[R]	A0A0G2JIW1 [386-416]			0	3180.74
78	A0A0G2JIW1	HSPA1B	[R].TLSSSTQASLEIDSLFEGIDFYTSITR.[A]	A0A0G2JIW1 [274-300]			0	2981.46
78	A0A0G2JIW1	HSPA1B	[K].EIAEAYLGYPVTNAVITVPAYFNDSQR.[Q]	A0A0G2JIW1 [130-156]			0	3001.49
79	G3V3D1	NPC2	[K].AVVHGILMGVPVPFPIPEPDGCK.[S]	G3V3D1 [72-94]	1xCarbamidomethyl [C22]		0	2429.27						0.0149326									0.168851					-0.342878	-0.269652	-0.229619	-0.123243	-0.130493	-0.164732	-0.164547
79	G3V3D1	NPC2	[K].EVNVSPCPTQPCQLSK.[G]	G3V3D1 [36-51]	2xCarbamidomethyl [C7; C12]		0	1843.87			-0.458223																	0.444561	0.101607	-0.129378		-0.252008				-0.0886919	-0.105535		-0.0627589		-1.27913							-0.977259
79	G3V3D1	NPC2	[K].SGINCPIQK.[D]	G3V3D1 [95-103]	1xCarbamidomethyl [C5]		0	1016.52																				-0.951913		0.0247033	-0.0474834						-0.0950245
80	Q9UK45	LSM7	[K].KESILDLSK.[Y]	Q9UK45 [9-17]			1	1032.59											1.63286																								0.407872	-0.217605
81	P30040	ERP29	[K].ILDQGEDFPASEMTR.[I]	P30040 [209-223]			0	1708.78
81	P30040	ERP29	[R].DGDFENPVPYTGAVK.[V]	P30040 [123-137]			0	1608.75	-0.175514																																	-0.104218	-0.0778497	-0.140251	-0.105607	-0.0781156	-0.0721805	-0.0686074	-0.0992952
81	P30040	ERP29	[K].GQGVYLGMPGCLPVYDALAGEFIR.[A]	P30040 [147-170]	1xCarbamidomethyl [C11]		0	2583.27	0.018371																																	0.00261285	-0.0913443			0.028282		-0.304202	0.0295882
81	P30040	ERP29	[R].LAENSASSDDLLVAEVGISDYGDK.[L]	P30040 [76-99]			0	2468.17																																		0.0643419	-0.0929124				0.124019		-0.844224
81	P30040	ERP29	[K].GQGVYLGMPGCLPVYDALAGEFIR.[A]	P30040 [147-170]	1xCarbamidomethyl [C11]; 1xOxidation [M8]		0	2599.27															-1.28973																				-0.00654809					-0.32624	-0.374645
81	P30040	ERP29	[K].SLNILTAFQK.[K]	P30040 [244-253]			0	1134.65																																		-0.0631078	0.00746223	-0.124934	-0.12457	-0.00159401	-0.327567	-0.0225979	0.00704637
81	P30040	ERP29	[K].GALPLDTVTFYK.[V]	P30040 [37-48]			0	1324.71
81	P30040	ERP29	[K].LDKESYPVFYLFR.[D]	P30040 [110-122]			1	1676.87
81	P30040	ERP29	[K].FDTQYPYGEK.[Q]	P30040 [60-69]			0	1247.56										-0.288061																									-0.05927			-0.0673904
82	Q06830	PRDX1	[K].KLNCQVIGASVDSHFCHLAWVNTPK.[K]	Q06830 [68-92]	2xCarbamidomethyl [C4; C16]		1	2881.42	0.0079595				-0.240722						0.75399				1.04207		0.0146477	-0.201365						0.648594			0.0439876	0.515105		-0.148666			-0.148799		0.0262471
82	Q06830	PRDX1	[K].KQGGLGPMNIPLVSDPKR.[T]	Q06830 [93-110]			2	1907.05																													0.0728226		0.209682	-0.184087	-0.0101313		0.0915948
82	Q06830	PRDX1	[K].HGEVCPAGWKPGSDTIKPDVQK.[S]	Q06830 [169-190]	1xCarbamidomethyl [C5]		0	2406.19	-0.184797								-0.325749	-0.663636				0.474296	-0.264512					-0.120877	-0.350204	-0.381889		-0.144426	-0.134423	-0.260352	-0.318425		-0.165482	-0.172254	-0.153736	-0.253896	-0.156795		-0.177203		-1.1089				-0.606021
82	Q06830	PRDX1	[K].LNCQVIGASVDSHFCHLAWVNTPK.[K]	Q06830 [69-92]	2xCarbamidomethyl [C3; C15]		0	2753.33																		-0.0412736		0.102169	-0.138588	-0.151218	0.428933	-0.0238025	-0.131491	-0.0698654	-0.032408	-0.0568206	-0.212971	-0.113535	-0.112131	-0.107174	-0.131283	-0.0958682	-0.121576	-0.1382	-0.232762	-0.117149	-0.141423	-0.0925553	-0.237434
82	Q06830	PRDX1	[K].LNCQVIGASVDSHFCHLAWVNTPKK.[Q]	Q06830 [69-93]	2xCarbamidomethyl [C3; C15]		1	2881.42
82	Q06830	PRDX1	[R].LVQAFQFTDK.[H]	Q06830 [159-168]			0	1196.63	0.0447807																	-0.0921787		-0.0372865	-0.0207433	-0.0750836	-0.0468655	-0.0728769	-0.00543759		-0.045339	0.010085	-0.099054	-0.0612149	-0.07607	-0.0954158	-0.0827764	-0.0707157	-0.0865435	-0.0922764	-0.0878059	-0.152963	-0.109847	-0.176006	-0.158992
82	Q06830	PRDX1	[R].TIAQDYGVLK.[A]	Q06830 [111-120]			0	1107.6																		-0.141596		0.0223243	-0.039121	-0.0216183			-0.1893	-0.136127	-0.0481895	-0.00842796	-0.0432555	-0.139197	-0.0564492	-0.0983965	-0.0812363		-0.0298654	-0.0165725	-0.0657456	-0.120539	-0.0833193	-0.151578	-0.0760434
82	Q06830	PRDX1	[K].RTIAQDYGVLK.[A]	Q06830 [110-120]			1	1263.71																											-0.0314689		-0.129045	-0.121786		-0.155092			-0.13708			-1.20536			-1.17335
82	Q06830; P32119	PRDX1	[R].QITVNDLPVGR.[S]	Q06830 [141-151]; P32119 [140-150]			0	1211.67						-0.368974						-0.0523395					-0.144703	-0.06259	-0.0877325	-0.0130471	-0.0111188	-0.0475625	-0.0457923	-0.0425551	-0.0980172	-0.100638	-0.0719043	-0.0649725	-0.0872557	-0.0772174	-0.0747548	-0.0747163	-0.0804031	-0.235873	-0.0772919	-0.129112	-0.0849906	-0.108	-0.0950201	-0.0894513	-0.106632
82	Q06830	PRDX1	[K].QGGLGPMNIPLVSDPK.[R]	Q06830 [94-109]			0	1622.86	-0.0868708							-1.07394										-0.563602		-0.163388	-0.275298	-0.0782599	-0.369321	-0.141611	-0.576481	-0.377149	-0.170909		-0.131457	-0.14821	-0.50463	-0.0474118	-0.139796	-0.234585	-0.167935	-0.476298	-0.409275	-0.164685	-1.0136		-0.0581368
82	Q06830	PRDX1	[K].QGGLGPMNIPLVSDPK.[R]	Q06830 [94-109]	1xOxidation [M7]		0	1638.85	0.423192														-2.58944					-0.0709415	-0.0705994	-0.105524	-0.0700914	-0.068805	-0.0381523	-0.260994	-0.126634	-0.065045	-0.203068	-0.209151	-0.151174	-0.134208	-0.106435		-0.163507	-0.142801	-0.110101	-0.130306	-0.0789363	-0.120797	-0.107086
82	Q06830	PRDX1	[K].KQGGLGPMNIPLVSDPK.[R]	Q06830 [93-109]			1	1750.95
82	Q06830	PRDX1	[K].KQGGLGPMNIPLVSDPK.[R]	Q06830 [93-109]	1xOxidation [M8]		1	1766.95
82	Q06830	PRDX1	[R].GLFIIDDKGILR.[Q]	Q06830 [129-140]			1	1359.8																													0.10556	-0.139315		-0.491203	-0.111861		-0.0880878			-0.138855
82	Q06830	PRDX1	[K].ATAVMPDGQFK.[D]	Q06830 [17-27]			0	1164.57	-0.499874																			-0.136243	0.183046	0.143893					-0.0527374		-0.0770377	-0.135346	-0.166682	-0.0920989	-0.11273		-0.136209	-0.152299				-0.542718
83	Q9P2E9	RRBP1	[K].LLATEQEDAAVAK.[S]	Q9P2E9 [708-720]			0	1358.72
83	Q9P2E9	RRBP1	[R].DAQDVQASQAEADQQQTR.[L]	Q9P2E9 [971-988]			0	1988.89
83	Q9P2E9	RRBP1	[R].ELCHTQSSHASLR.[A]	Q9P2E9 [890-902]	1xCarbamidomethyl [C3]		0	1525.72
83	Q9P2E9	RRBP1	[K].KGEPGPPDADGPLYLPYK.[T]	Q9P2E9 [634-651]			1	1913.96																										-0.491847	-0.635822				-0.628954	-0.622207	-0.282976		0.026267	0.135745
83	Q9P2E9	RRBP1	[R].QLLLESQSQLDAAK.[S]	Q9P2E9 [1228-1241]			0	1543.83
83	Q9P2E9	RRBP1	[R].TAGPLESSETEEASQLK.[E]	Q9P2E9 [1334-1350]			0	1776.85
83	Q9P2E9	RRBP1	[R].NTDVAQSPEAPK.[Q]	Q9P2E9 [609-620]			0	1256.61
83	Q9P2E9	RRBP1	[K].HPPAPAEPSSDLASK.[L]	Q9P2E9 [1099-1113]			0	1503.74
83	Q9P2E9	RRBP1	[K].VEPAVSSVVNSIQVLTSK.[A]	Q9P2E9 [149-166]			0	1857.03
83	Q9P2E9	RRBP1	[K].SHVEDGDIAGAPASSPEAPPAEQDPVQLK.[T]	Q9P2E9 [1263-1291]			0	2912.39
84	E9PGZ1	CALD1	[K].TTTTNTQVEGDDEAAFLER.[L]	E9PGZ1 [75-93]			0	2097.96																-0.698098									0.393729	0.0595098						-0.0615607
84	E9PGZ1	CALD1	[K].SAKPTKPAASDLPVPAEGVR.[N]	E9PGZ1 [430-449]			0	1991.09
84	E9PGZ1	CALD1	[R].RGETESEEFEK.[L]	E9PGZ1 [282-292]			1	1340.6
84	E9PGZ1	CALD1	[R].YEIEETETVTK.[S]	E9PGZ1 [154-164]			0	1341.64
84	E9PGZ1	CALD1	[R].GSIGENQIKDEK.[I]	E9PGZ1 [195-206]			1	1317.66								-0.399354														-1.36928	0.0170233			-0.852386
84	E9PGZ1	CALD1	[K].RGSIGENQIKDEK.[I]	E9PGZ1 [194-206]			2	1473.77
85	Q01581	HMGCS1	[K].NSIYSGLEAFGDVK.[L]	Q01581 [292-305]			0	1499.74									-0.229328
86	H0Y8X4	DNPH1	[R].LIHEQDLEWLQQADVVVAEVTQPSLGVGYELGR.[A]	H0Y8X4 [144-176]			0	3691.9																											0.636629										0.00777759
86	H0Y8X4	DNPH1	[R].FGTVLTEHVAAAELGAR.[G]	H0Y8X4 [48-64]			0	1741.92
86	H0Y8X4	DNPH1	[R].ILCLFRPQSGR.[V]	H0Y8X4 [184-194]	1xCarbamidomethyl [C3]		0	1346.74
87	P48147	PREP	[K].TFPLDVGSIVGYSGQK.[K]	P48147 [374-389]			0	1667.86																											0.510277					-0.193518
87	P48147	PREP	[K].LIDNFEGEYDYVTNEGTVFTFK.[T]	P48147 [282-303]			0	2601.2																																-0.0766793
87	P48147	PREP	[R].LWYCDLQQESSGIAGILK.[W]	P48147 [261-278]	1xCarbamidomethyl [C4]		0	2081.04
87	P48147	PREP	[K].LPEADDIQYPSMLLLTADHDDR.[V]	P48147 [622-643]			0	2528.2																																-0.0920681
87	P48147	PREP	[R].VFLDPNILSDDGTVALR.[G]	P48147 [112-128]			0	1844.98																				0.58904			0.639408			-0.843855		0.0549509				-0.136759	-0.210717
87	P48147	PREP	[K].LYYHVLGTDQSEDILCAEFPDEPK.[W]	P48147 [210-233]	1xCarbamidomethyl [C16]		0	2839.31																																-0.171828
87	P48147	PREP	[K].ITVPFLEQCPIR.[G]	P48147 [49-60]	1xCarbamidomethyl [C9]		0	1472.79
87	P48147	PREP	[K].WMGGAELSDDGR.[Y]	P48147 [234-245]			0	1293.55
87	P48147	PREP	[R].YFYFYNTGLQNQR.[V]	P48147 [86-98]			0	1713.8																																-0.100054
87	P48147	PREP	[R].VLYVQDSLEGEAR.[V]	P48147 [99-111]			0	1478.75
87	P48147	PREP	[R].VINIDFRDPEESK.[W]	P48147 [313-325]			1	1561.79																																0.719939	-0.0983678								0.389065
87	P48147	PREP	[K].NILQLHDLTTGALLK.[T]	P48147 [359-373]			0	1649.96																																-0.135723	-0.0431094
87	P48147	PREP	[K].QNCFDDFQCAAEYLIK.[E]	P48147 [524-539]	2xCarbamidomethyl [C3; C9]		0	2021.87
87	P48147	PREP	[K].QSNPLLIHVDTK.[A]	P48147 [666-677]			0	1364.75
87	P48147	PREP	[R].DETAVQDYHGHK.[I]	P48147 [12-23]			0	1399.62
87	P48147	PREP	[K].FIATLQYIVGR.[S]	P48147 [652-662]			0	1280.74																																-0.0424693	-0.174037
87	P48147	PREP	[K].ICDPYAWLEDPDSEQTK.[A]	P48147 [24-40]	1xCarbamidomethyl [C2]		0	2066.9																																	-0.0476489
87	P48147	PREP	[R].KQSNPLLIHVDTK.[A]	P48147 [665-677]			1	1492.85																																-0.061953	0.0522545
87	P48147	PREP	[K].FSCMAWTHDGK.[G]	P48147 [173-183]	1xCarbamidomethyl [C3]		0	1339.56																																-0.0806054
87	P48147	PREP	[K].GIDASDYQTVQIFYPSK.[D]	P48147 [429-445]			0	1931.94
87	P48147	PREP	[R].GGGEYGETWHK.[G]	P48147 [506-516]			0	1220.53
87	P48147	PREP	[K].RYFYFYNTGLQNQR.[V]	P48147 [85-98]			1	1869.9																						0.601784										-0.0586398
88	P12277	CKB	[K].TDLNPDNLQGGDDLDPNYVLSSR.[V]	P12277 [108-130]			0	2518.17																																							0.282859
88	P12277	CKB	[R].FCTGLTQIETLFK.[S]	P12277 [253-265]	1xCarbamidomethyl [C2]		0	1557.8
88	P12277	CKB	[K].LAVEALSSLDGDLAGR.[Y]	P12277 [157-172]			0	1586.84																		-0.213553					-0.207711													-0.355589
89	Q15691	MAPRE1	[R].NIELICQENEGENDPVLQR.[I]	Q15691 [223-241]	1xCarbamidomethyl [C6]		0	2270.07
89	Q15691	MAPRE1	[R].QGQETAVAPSLVAPALNKPK.[K]	Q15691 [131-150]			0	2019.12
89	Q15691	MAPRE1	[K].FFDANYDGKDYDPVAAR.[Q]	Q15691 [114-130]			1	1963.88															-0.585124						0.401191
89	Q15691	MAPRE1	[K].FFDANYDGK.[D]	Q15691 [114-122]			0	1076.47
90	P27361	MAPK3	[R].IADPEHDHTGFLTEYVATR.[W]	P27361 [190-208]			0	2172.04
91	Q9H488	POFUT1	[K].VVSLKPEVAQVDLYILGQADHFIGNCVSSFTAFVK.[R]	Q9H488 [329-363]	1xCarbamidomethyl [C26]		0	3852		-0.0109532
91	Q9H488	POFUT1	[R].FGNQADHFLGSLAFAK.[L]	Q9H488 [44-59]			0	1722.86
92	Q13867	BLMH	[R].AQHVFQHAVPQEGKPITNQK.[S]	Q13867 [49-68]			0	2257.18
93	I3L0A0; Q15819	TMEM189-UBE2V1	[K].GVGDGTVSWGLEDDEDMTLTR.[W]	I3L0A0 [250-270]; Q15819 [25-45]	1xOxidation [M17]		0	2268.99																										-0.0560161	-0.329636	-0.334321
93	I3L0A0	TMEM189-UBE2V1	[K].YPEAPPFVR.[F]	I3L0A0 [298-306]			0	1075.56																										-0.137302	-0.0851205	-0.131501		-0.0902559	-0.196459
93	I3L0A0; Q15819	TMEM189-UBE2V1	[R].WTGMIIGPPR.[TFL]	I3L0A0 [271-280]; Q15819 [46-55]	1xOxidation [M4]		0	1143.6																										-0.255433	0.159284	-0.123594
93	I3L0A0; Q15819	TMEM189-UBE2V1	[R].WTGMIIGPPR.[TFL]	I3L0A0 [271-280]; Q15819 [46-55]			0	1127.6																										-0.0953078	-0.104076	-0.0745701
93	I3L0A0; Q15819	TMEM189-UBE2V1	[K].GVGDGTVSWGLEDDEDMTLTR.[W]	I3L0A0 [250-270]; Q15819 [25-45]			0	2253																												-0.156776
93	I3L0A0	TMEM189-UBE2V1	[K].INMNGVNSSNGVVDPR.[A]	I3L0A0 [311-326]			0	1672.81
93	I3L0A0; Q15819	TMEM189-UBE2V1	[R].LLEELEEGQK.[G]	I3L0A0 [240-249]; Q15819 [15-24]			0	1187.62
94	P04179	SOD2	[K].FNGGGHINHSIFWTNLSPNGGGEPK.[G]	P04179 [90-114]			0	2637.26								0.34606																	0.370633	-0.0336091	-0.0252777	-0.186855	0.151255	-0.0628504	-0.00151942	0.15949
94	P04179	SOD2	[K].HSLPDLPYDYGALEPHINAQIMQLHHSK.[H]	P04179 [26-53]			0	3224.59																											-0.105036	0.0380177			-0.589598		0.0657373							0.102858	-0.0720451
94	P04179	SOD2	[K].LTAASVGVQGSGWGWLGFNK.[E]	P04179 [135-154]			0	2035.04		0.0762417	0.434757		1.1216			0.241758									0.435927				0.294801	0.116887				-0.102897	0.093096	0.00897234		0.0733059	0.0274291					-0.478488				-0.135404
94	P04179	SOD2	[R].GHLQIAACPNQDPLQGTTGLIPLLGIDVWEHAYYLQYK.[N]	P04179 [157-194]	1xCarbamidomethyl [C8]		0	4293.18		-0.463227						-0.218157											-0.224335						-0.111842	-0.256259	-0.075264	-0.0450126	-0.122413	-0.252462	0.163722				0.133227
94	P04179	SOD2	[K].HHAAYVNNLNVTEEK.[Y]	P04179 [54-68]			0	1738.85																			-0.132187		-0.595562				-0.29324		-2.25433	-0.0157329	-0.0256861	0.0103691	0.058922	0.148472
94	P04179	SOD2	[K].AIWNVINWENVTER.[Y]	P04179 [203-216]			0	1743.88																									-1.44083	0.042696	-0.0074063	0.0010053		0.0825792	0.000762174
94	P04179	SOD2	[K].LTAASVGVQGSGWGWLGFNKER.[G]	P04179 [135-156]			1	2320.18
94	P04179	SOD2	[K].GELLEAIKR.[D]	P04179 [115-123]			1	1028.61	-0.602684																										0.0254999	0.0376464	-0.0551813	-0.0650655	0.0307309
94	P04179	SOD2	[K].GDVTAQIALQPALK.[F]	P04179 [76-89]			0	1424.81																									0.00409029		-0.0436684	-0.0457184		-0.0709785	-0.0289436
94	P04179	SOD2	[K].NVRPDYLK.[A]	P04179 [195-202]			0	1004.55																												0.026929		0.0278551	0.0322217
95	A0A0U1RRM4	PTBP1	[R].IAIPGLAGAGNSVLLVSNLNPER.[V]	A0A0U1RRM4 [383-405]			0	2275.28	-0.0947673					-0.664363
95	A0A0U1RRM4	PTBP1	[R].KLPIDVTEGEVISLGLPFGK.[V]	A0A0U1RRM4 [65-84]			1	2112.2																											-0.13449		-0.387344	-0.0450564		-0.599202	-0.207132
95	A0A0U1RRM4	PTBP1	[R].VTPQSLFILFGVYGDVQR.[V]	A0A0U1RRM4 [406-423]			0	2039.1
95	A0A0U1RRM4	PTBP1	[K].LSLDGQNIYNACCTLR.[I]	A0A0U1RRM4 [270-285]	2xCarbamidomethyl [C12; C13]		0	1897.89	-0.00761132
95	A0A0U1RRM4	PTBP1	[K].NNQFQALLQYADPVSAQHAK.[L]	A0A0U1RRM4 [250-269]			0	2243.12	-0.0588918																				-0.197575				-1.22977										0.636581						0.463061
95	A0A0U1RRM4	PTBP1	[K].NFQNIFPPSATLHLSNIPPSVSEEDLK.[V]	A0A0U1RRM4 [502-528]			0	2994.52
95	A0A0U1RRM4	PTBP1	[R].GQPIYIQFSNHK.[E]	A0A0U1RRM4 [123-134]			0	1431.74	-0.00659042																											0.110949	-0.357967	-0.204229	-0.18268	-0.474857	-0.212876		0.0202041	-0.249872	-0.0460141		-0.0495804		-0.254525
96	P00352	ALDH1A1	[K].KFPVFNPATEEELCQVEEGDKEDVDK.[A]	P00352 [37-62]	1xCarbamidomethyl [C14]		2	3052.41											-0.327167	-0.633804			-0.3314	-0.629894	-0.267637	-0.407432	-0.356464	-0.17566	-0.180792	-0.381266	-0.454552	-0.527423	-0.595813			-0.447601		-0.192984	-0.251646
96	P00352	ALDH1A1	[K].KYILGNPLTPGVTQGPQIDKEQYDK.[I]	P00352 [329-353]			2	2802.47	-0.0353948										-0.42719	0.0368849					-0.17707	-0.149481	-0.40869	-0.100716	-0.18567	-0.150341		-0.215166
96	P00352	ALDH1A1	[K].IGPALSCGNTVVVKPAEQTPLTALHVASLIK.[E]	P00352 [180-210]	1xCarbamidomethyl [C7]		0	3184.78	-0.0270933				-0.281133						-0.194861	-0.297552		-0.311211	0.159302	-0.12787	-0.17888	-0.134259	-0.13506	-0.0800212	-0.096138	-0.910618	-0.106215	-0.136659	-0.238826	-0.0643173		-0.198226
96	P00352	ALDH1A1	[K].LYSNAYLNDLAGCIK.[T]	P00352 [114-128]	1xCarbamidomethyl [C13]		0	1714.85
96	P00352	ALDH1A1	[R].HEPIGVCGQIIPWNFPLVMLIWK.[I]	P00352 [157-179]	1xCarbamidomethyl [C7]		0	2747.46		0.016664						-0.0580686			-0.154809					-0.16534		-0.0279201	-0.229003	-0.053826	0.0733717	0.266933								0.344463
96	P00352	ALDH1A1	[K].GYFVQPTVFSNVTDEMR.[I]	P00352 [379-395]			0	1989.94	0.0209545			-0.588392							-0.455982	-0.840986				-1.83858				-0.0172576	0.0138899							0.852989				0.376686
96	P00352	ALDH1A1	[K].YILGNPLTPGVTQGPQIDKEQYDK.[I]	P00352 [330-353]			1	2674.37	-0.00964248					0.712739	0.0143153					-0.444933				0.00781659	-0.226915	-0.123749	-0.373935	-0.0807467	-0.0991187		-0.444909	0.333015				0.266565				1.22575
96	P00352	ALDH1A1	[R].ANNTFYGLSAGVFTK.[D]	P00352 [421-435]			0	1589.8											-0.136469	-0.144947	-0.0464229		-0.233998	-0.0872721	-0.130833	-0.0875189	-0.0633463	-0.0124392	0.015235	-0.0748594
96	P00352	ALDH1A1	[R].IFVEESIYDEFVR.[R]	P00352 [309-321]			0	1645.81											-0.248311	-0.286892					-0.132904	-0.057493		-0.0844854	-0.0828161	-0.089888	-0.111407	-0.0530599
96	P00352	ALDH1A1	[K].LECGGGPWGNK.[G]	P00352 [368-378]	1xCarbamidomethyl [C3]		0	1174.53											-0.173117						-0.13038	-0.102038		-0.0377288	-0.0645211	-0.0750593		-0.0352447
96	P00352	ALDH1A1	[K].IFINNEWHDSVSGK.[K]	P00352 [23-36]			0	1645.8											-0.175143	-0.199191		-0.160319	-0.222149	-0.197101	-0.123127	-0.0871381	-0.13972	-0.0490311	-0.0467158	-0.0385383		0.892203						-0.481417	-0.985864				-0.04343
96	P00352	ALDH1A1	[K].YILGNPLTPGVTQGPQIDK.[E]	P00352 [330-348]			0	2011.09											-0.151237	-0.361636					-0.144412	-0.0727362	-0.0569999	-0.0712481	-0.0400914	-0.0971572		-0.744406	-0.195582	0.0453208
96	P00352	ALDH1A1	[K].SPCIVLADADLDNAVEFAHHGVFYHQGQCCIAASR.[I]	P00352 [274-308]	3xCarbamidomethyl [C3; C29; C30]		0	3928.8
96	P00352	ALDH1A1	[R].TIPIDGNFFTYTR.[H]	P00352 [144-156]			0	1544.77											-0.125603	-0.0746978		-0.0321202	-0.0785168	-0.0856775	-0.127654	-0.0670397	-0.0143593	-0.0313695	-0.00106406	-0.0630368	0.0101264	-0.0816839	-0.102827	-0.0594174	-0.088399	-0.0911288			0.164217										0.444739
96	P00352	ALDH1A1	[R].QAFQIGSPWR.[T]	P00352 [69-78]			0	1189.61											-0.138022	-0.159447			-0.061838		-0.181096	-0.0745454	-0.0463254	-0.0302329	-0.0137844	-0.130277	-0.0753391
96	P00352	ALDH1A1	[K].RANNTFYGLSAGVFTK.[D]	P00352 [420-435]			1	1745.9											-0.154379						-0.092471	-0.0181145		0.00444791	-0.0200019
96	P00352	ALDH1A1	[K].EAGFPPGVVNIVPGYGPTAGAAISSHMDIDK.[V]	P00352 [211-241]	1xOxidation [M27]		0	3083.51											-0.872283				-1.5134		-0.421314	-0.299173	-0.362499	-0.226217	-0.192743	-0.453371
96	P00352	ALDH1A1	[K].EAGFPPGVVNIVPGYGPTAGAAISSHMDIDK.[V]	P00352 [211-241]			0	3067.52								0.0183038	-0.7952		-1.04347						-0.593284	-0.196054	-0.609412	-0.130736	-0.0243965												0.763855			-0.39249		-1.57634
96	P00352	ALDH1A1	[R].ELGEYGFHEYTEVK.[T]	P00352 [477-490]			0	1700.78	-0.315501								-0.363834		-0.206913	-0.183793	-0.332654	-0.111185	-0.197562	-0.159697	-0.195194	-0.123592	-0.198509	-0.0950981	-0.113441	-0.100609					-0.2512	-0.277326		0.26574	-0.206896		0.0370942
96	P00352	ALDH1A1	[K].EEIFGPVQQIMK.[F]	P00352 [399-410]			0	1418.73	-0.013158										-0.191008	-0.216428			-0.171355	-0.14439	-0.166073	-0.108588	-0.0342818	-0.0637011	-0.0490671	-0.0848935
96	P00352	ALDH1A1	[K].KYILGNPLTPGVTQGPQIDK.[E]	P00352 [329-348]			1	2139.18																	-0.186625			-0.0713714		-0.143166
96	P00352	ALDH1A1	[K].GYFVQPTVFSNVTDEMR.[I]	P00352 [379-395]	1xOxidation [M16]		0	2005.93											-0.145668					-0.186678	-0.241267																		0.188099
96	P00352	ALDH1A1	[R].HEPIGVCGQIIPWNFPLVMLIWK.[I]	P00352 [157-179]	1xCarbamidomethyl [C7]; 1xOxidation [M19]		0	2763.45											0.019058						0.717217	0.0124273	0.115998	0.124399	0.0507494	0.214087	-0.38357
96	P00352	ALDH1A1	[K].AITISSALQAGTVWVNCYGVVSAQCPFGGFK.[M]	P00352 [440-470]	2xCarbamidomethyl [C17; C25]		0	3288.62
96	P00352	ALDH1A1	[K].VAFTGSTEVGK.[L]	P00352 [242-252]			0	1095.57																		-0.121399		-0.0515961	-0.453433	-0.127007		0.253252
96	P00352	ALDH1A1	[K].ILDLIESGKK.[E]	P00352 [354-363]			1	1115.67											-0.0503078						-0.103725	-0.0467355	-0.102625	-0.011325	0.00588025	-0.113215
96	P00352	ALDH1A1	[R].LLLATMESMNGGK.[L]	P00352 [101-113]			0	1364.69
97	M0R226	MRPL34	[R].LSTPAGVQVILR.[R]	M0R226 [162-173]			0	1253.76
98	Q9C005	DPY30	[K].ERPPNPIEFLASYLLK.[N]	Q9C005 [75-90]			0	1887.04		0.0701025																														0.19774
98	Q9C005	DPY30	[R].AYLDQTVVPILLQGLAVLAK.[E]	Q9C005 [55-74]			0	2125.26	-0.0414362
99	Q16822	PCK2	[R].QCPIMDPAWEAPEGVPIDAIIFGGR.[R]	Q16822 [430-454]	1xCarbamidomethyl [C2]		0	2739.33	-0.174159
99	Q16822	PCK2	[R].DEGWLAEHMLILGITSPAGK.[K]	Q16822 [275-294]			0	2138.1
99	Q16822	PCK2	[R].LGTPVLQALGDGDFVK.[C]	Q16822 [194-209]			0	1629.88	-0.126362
99	Q16822	PCK2	[R].VLSGDLGQLPTGIR.[D]	Q16822 [32-45]			0	1425.81	-0.0607167
99	Q16822	PCK2	[R].LCQPEGIHICDGTEAENTATLTLLEQQGLIR.[K]	Q16822 [54-84]	2xCarbamidomethyl [C2; C10]		0	3480.71	-0.0846318
100	P62280	RPS11	[R].DVQIGDIVTVGECRPLSK.[T]	P62280 [119-136]	1xCarbamidomethyl [C13]		0	1986.03	-0.0864434																					0.957037										-0.198231	-0.537728								-0.624506
100	P62280	RPS11	[K].EAIEGTYIDKK.[C]	P62280 [49-59]			1	1266.66										0.884762											1.36462												2.39259			0.142749					-1.23115
100	P62280	RPS11	[R].RDYLHYIR.[K]	P62280 [90-97]			1	1135.6																														-0.605403						-0.0115027
100	P62280	RPS11	[K].EAIEGTYIDK.[K]	P62280 [49-58]			0	1138.56
100	P62280	RPS11	[K].NMSVHLSPCFR.[D-]	P62280 [108-118]	1xCarbamidomethyl [C9]		0	1347.63
101	Q8NI22	MCFD2	[K].EEGSEQAPLMSEDELINIIDGVLR.[D]	Q8NI22 [103-126]	1xOxidation [M10]		0	2673.29
101	Q8NI22	MCFD2	[K].EEGSEQAPLMSEDELINIIDGVLR.[D]	Q8NI22 [103-126]			0	2657.3
101	Q8NI22	MCFD2	[R].DDDKNNDGYIDYAEFAK.[S]	Q8NI22 [127-143]			1	1992.85
102	P37108	SRP14	[R].TSGSVYITLK.[K]	P37108 [22-31]			0	1068.59
102	P37108	SRP14	[K].KGTVEGFEPADNK.[C]	P37108 [43-55]			1	1391.68
102	P37108	SRP14	[K].FQMAYSNLLR.[A]	P37108 [79-88]	1xOxidation [M3]		0	1258.62
102	P37108	SRP14	[K].GTVEGFEPADNK.[C]	P37108 [44-55]			0	1263.59																															0.543638
103	Q12931	TRAP1	[R].YESSALPSGQLTSLSEYASR.[M]	Q12931 [470-489]			0	2146.03	-0.132347																																								0.724353
104	K7EM18	EIF1	[K].TLTTVQGIADDYDK.[K]	K7EM18 [43-56]			0	1539.75
104	K7EM18	EIF1	[K].TLTTVQGIADDYDKK.[K]	K7EM18 [43-57]			1	1667.85
104	K7EM18	EIF1	[K].GDDLLPAGTEDYIHIR.[I]	K7EM18 [19-34]			0	1784.88																													-0.256559				-0.0756035
104	K7EM18	EIF1	[K].NICQFLVEIGLAK.[D]	K7EM18 [92-104]	1xCarbamidomethyl [C3]		0	1504.82
105	P52907	CAPZA1	[K].IEGYEDQVLITEHGDLGNSR.[F]	P52907 [67-86]			0	2245.07	-0.706305					-0.569525		0.708914	-0.0283224		1.4316	0.213818				1.3																									1.76689
105	P52907	CAPZA1	[K].FITHAPPGEFNEVFNDVR.[L]	P52907 [20-37]			0	2089.01	-0.238144
105	P52907	CAPZA1	[K].FTITPPTAQVVGVLK.[I]	P52907 [179-193]			0	1570.92
105	P52907	CAPZA1	[K].TIDGQQTIIACIESHQFQPK.[N]	P52907 [147-166]	1xCarbamidomethyl [C11]		0	2314.15	-0.145292				-1.81325			-0.89158							-0.239503		-1.38545	-0.943544				-0.861885			-0.32119													-0.521379	-1.15217
106	P51991	HNRNPA3	[K].IFVGGIKEDTEEYNLR.[D]	P51991 [128-143]			1	1882.95	-0.201505																						-0.342233		0.0183797													-0.984057		-0.562627
106	P51991	HNRNPA3	[K].WGTLTDCVVMR.[D]	P51991 [58-68]	1xCarbamidomethyl [C7]		0	1337.63	-0.0129971
106	P51991	HNRNPA3	[K].LFIGGLSFETTDDSLR.[E]	P51991 [37-52]			0	1770.89
106	P51991	HNRNPA3	[R].GFAFVTFDDHDTVDK.[I]	P51991 [168-182]			0	1713.78	-0.0982008
106	P51991	HNRNPA3	[R].EDSVKPGAHLTVK.[K]	P51991 [114-126]			0	1380.75																																								-0.000596339
106	P51991	HNRNPA3	[R].RGEEGHDPKEPEQLR.[K]	P51991 [21-35]			2	1776.86
106	P51991	HNRNPA3	[-].MEVKPPPGRPQPDSGR.[R]	P51991 [1-16]	1xAcetyl [N-Term]	P51991 1xAcetyl [N-Term]	0	1789.9	0.135322					-0.969979	-0.766441			-0.268611							-0.73734		-0.629425							-0.550092
106	P51991	HNRNPA3	[K].LFIGGLSFETTDDSLREHFEK.[W]	P51991 [37-57]			1	2441.2
107	P05787	KRT8	[R].SNMDNMFESYINNLR.[R]	P05787 [134-148]			0	1847.81	0.0649822
107	P05787	KRT8	[K].LKLEAELGNMQGLVEDFK.[N]	P05787 [159-176]			1	2034.06
107	P05787	KRT8	[K].LEAELGNMQGLVEDFK.[N]	P05787 [161-176]			0	1792.88
107	P05787	KRT8	[K].LSELEAALQR.[A]	P05787 [353-362]			0	1129.62	0.0064544																				-0.662				0.0435552								0.689823	0.144232
107	P05787	KRT8	[R].LQAEIEGLK.[G]	P05787 [317-325]			0	1000.57
107	P05787	KRT8	[K].LVSESSDVLPK.[-]	P05787 [473-483]			0	1173.64						-0.669578		-0.93148	-0.314441	-0.512695	-0.111383	0.0368727		-0.349356	-0.445681		-0.523645		0.0238929				0.513186	0.5374	0.694988	0.570573		0.564436			0.619736		0.388932
107	P05787	KRT8	[R].LEGLTDEINFLR.[Q]	P05787 [214-225]			0	1419.75	0.02367
107	P05787	KRT8	[K].YEELQSLAGK.[H]	P05787 [286-295]			0	1137.58
107	P05787	KRT8	[R].TEMENEFVLIK.[K]	P05787 [187-197]			0	1352.68
107	P05787	KRT8	[R].ASLEAAIADAEQR.[G]	P05787 [329-341]			0	1344.68	0.00264991
107	P05787	KRT8	[K].WSLLQQQK.[T]	P05787 [123-130]			0	1030.57
107	P05787	KRT8	[R].KLLEGEESR.[LI-]	P05787 [393-401]			1	1060.56
107	P05787	KRT8	[K].RTEMENEFVLIK.[K]	P05787 [186-197]	1xOxidation [M4]		1	1524.77
107	P05787	KRT8	[R].ASLEAAIADAEQRGELAIK.[D]	P05787 [329-347]			1	1956.04	0.10275	-0.109622
107	P05787	KRT8	[R].DGKLVSESSDVLPK.[-]	P05787 [470-483]			1	1473.78						-0.453095			0.338252	-0.505099											0.894099		0.58104	0.54018											-0.844187		-1.31765
108	P61981	YWHAG	[K].NVTELNEPLSNEER.[N]	P61981 [29-42]			0	1643.79																			-0.560002			-0.38039																		-1.27325
108	P61981	YWHAG	[K].ELEAVCQDVLSLLDNYLIK.[N]	P61981 [92-110]	1xCarbamidomethyl [C6]		0	2235.16	-0.0827942		-0.0798868		0.0476874
108	P61981	YWHAG	[K].TAFDDAIAELDTLNEDSYK.[D]	P61981 [199-217]			0	2130.97
108	P61981	YWHAG	[R].LGLALNYSVFYYEIQNAPEQACHLAK.[T]	P61981 [173-198]	1xCarbamidomethyl [C22]		0	3012.49																					-0.0807856			1.00297										0.421412
108	P61981	YWHAG	[K].TAFDDAIAELDTLNEDSYKDSTLIMQLLR.[D]	P61981 [199-227]			1	3301.61	0.0433641
108	P61981	YWHAG	[K].AYSEAHEISK.[E]	P61981 [153-162]			0	1134.54
108	P61981	YWHAG	[R].DNLTLWTSDQQDDDGGEGNN.[-]	P61981 [228-247]			0	2193.88
108	P61981	YWHAG	[R].YLAEVATGEK.[R]	P61981 [133-142]			0	1080.56							0.51102			0.0118346
108	P61981	YWHAG	[K].EHMQPTHPIR.[L]	P61981 [163-172]			0	1245.62
108	P61981	YWHAG	[K].EHMQPTHPIR.[L]	P61981 [163-172]	1xOxidation [M3]		0	1261.61
109	P25325	MPST	[R].AGQPLQLLDASWYLPK.[L]	P25325 [25-40]			0	1799.97													-0.188441	-0.220716	-0.103556			-0.559437		-0.234564	0.0262338	0.137039	-0.00534046	-0.733156	0.715498			-0.504137
109	P25325	MPST	[R].DGIEPGHIPGTVNIPFTDFLSQEGLEK.[S]	P25325 [198-224]			0	2910.45	-0.0877084												-0.186678	-0.218408	-0.21932	-0.604363				0.112712	0.286261						2.48391		1.70917			1.58978
109	P25325	MPST	[R].ARPEDVISEGR.[G]	P25325 [283-293]			0	1228.63
109	P25325	MPST	[R].HIPGAAFFDIDQCSDR.[T]	P25325 [53-68]	1xCarbamidomethyl [C13]		0	1848.83													-0.095618	-0.0866838	-0.0738783			-0.600101	-0.353015	-0.187019	0.183831
109	P25325	MPST	[R].AFGHHAVSLLDGGLR.[H]	P25325 [119-133]			0	1549.82													0.135295		-0.0347001					-0.00359451
109	P25325	MPST	[R].ALVSAQWVAEALR.[A]	P25325 [9-21]			0	1413.78															-0.113937
109	P25325	MPST	[K].TYEDIKENLESR.[R]	P25325 [165-176]			1	1496.72
109	P25325	MPST	[K].SQPAPAEFR.[A]	P25325 [147-155]			0	1002.5
109	P25325	MPST	[R].TSPYDHMLPGAEHFAEYAGR.[L]	P25325 [69-88]	1xOxidation [M7]		0	2265															-0.107356
110	P23284	PPIB	[K].IEVEKPFAIAK.[E]	P23284 [205-215]			0	1244.72	-0.1351																								0.616035
110	P23284	PPIB	[K].TVDNFVALATGEK.[G]	P23284 [72-84]			0	1364.71	-0.102484																				-0.0166042
110	P23284	PPIB	[K].DTNGSQFFITTVK.[T]	P23284 [146-158]			0	1457.73										0.645571				0.352448							-0.877186	-0.0187801			-0.0161529							-0.306604
110	P23284	PPIB	[K].HYGPGWVSMANAGK.[D]	P23284 [132-145]			0	1474.69
110	P23284	PPIB	[K].IEVEKPFAIAKE.[-]	P23284 [205-216]			1	1373.77
110	P23284	PPIB	[R].DKPLKDVIIADCGK.[I]	P23284 [191-204]	1xCarbamidomethyl [C12]		1	1571.85
110	P23284	PPIB	[K].VLEGMEVVR.[K]	P23284 [172-180]			0	1031.56
110	P23284	PPIB	[K].DFMIQGGDFTR.[G]	P23284 [99-109]			0	1286.58
111	F8VV71	UBE2N	[R].YFHVVIAGPQDSPFEGGTFK.[L]	F8VV71 [34-53]			0	2196.08	-0.414324																									-0.160128		-0.165251	-0.732612	-1.16177	-0.362056	2.05715				-1.06985		-0.679775	-1.38654		-1.07619
111	F8VV71	UBE2N	[K].LELFLPEEYPMAAPK.[IV]	F8VV71 [54-68]	1xOxidation [M11]		0	1763.89
112	O94925	GLS	[K].GIHFCHDLVSLCNFHNYDNLR.[H]	O94925 [514-534]	2xCarbamidomethyl [C5; C12]		0	2631.2
112	O94925	GLS	[K].FVIPDFMSFTSHIDELYESAK.[K]	O94925 [219-239]			0	2476.17
112	O94925	GLS	[K].FSPDLWGVSVCTVDGQR.[H]	O94925 [256-272]	1xCarbamidomethyl [C11]		0	1922.91	-0.12906	-0.0641449															-0.0995757															0.12312
113	P49189	ALDH9A1	[K].IGDPLLEDTR.[M]	P49189 [317-326]			0	1128.59																										-0.211895			-0.165688			0.464317	-0.116737				-0.0752095		-0.235792
113	P49189	ALDH9A1	[K].GIKPVTLELGGK.[S]	P49189 [247-258]			0	1211.74
114	Q08211	DHX9	[K].AENNSEVGASGYGVPGPTWDR.[G]	Q08211 [121-141]			0	2162.97
114	Q08211	DHX9	[R].ELDALDANDELTPLGR.[I]	Q08211 [838-853]			0	1741.86	-0.152049
114	Q08211	DHX9	[R].DFVNYLVR.[I]	Q08211 [64-71]			0	1025.54																													-0.0769235			-0.00377037	-0.113308
115	H7BZJ3; P30101	PDIA3	[R].ISDTGSAGLMLVEFFAPWCGHCK.[R]	H7BZJ3 [15-37]; P30101 [39-61]	2xCarbamidomethyl [C19; C22]		0	2583.18	-0.12863
115	H7BZJ3; P30101	PDIA3	[K].IFRDGEEAGAYDGPR.[T]	H7BZJ3 [81-95]; P30101 [105-119]			1	1652.77							0.181854												-1.05726																					-0.0842752
115	H7BZJ3; P30101	PDIA3	[K].RLAPEYEAAATR.[L]	H7BZJ3 [38-49]; P30101 [62-73]			1	1347.7
115	H7BZJ3	PDIA3	[-].SDVLELTDDNFESR.[I]	H7BZJ3 [1-14]			0	1639.74	-0.00711069																															0.323552
115	H7BZJ3; P30101	PDIA3	[K].YGVSGYPTLK.[I]	H7BZJ3 [71-80]; P30101 [95-104]			0	1084.57
116	Q9Y5Z4	HEBP2	[K].APEDAGPQPGSYEIR.[H]	Q9Y5Z4 [27-41]			0	1586.74
116	Q9Y5Z4	HEBP2	[K].NQEQLLTLASILR.[E]	Q9Y5Z4 [151-163]			0	1498.86
117	G3V0E4	PMPCB	[R].IVLAAAGGVSHDELLDLAK.[F]	G3V0E4 [239-257]			0	1892.05																				-0.247512	0.0253579	0.0674249				-0.0214994	0.135056					1.6916
117	G3V0E4	PMPCB	[R].RIPIPELEAR.[I]	G3V0E4 [432-441]			1	1193.7	-0.628371																			-0.0267011	-0.0622405	0.0198087	0.0998294	-0.066802	0.0947467	0.0104956	0.0506958	-0.0210954		0.0102365	0.0384985
118	P47755	CAPZA2	[K].FTITPSTTQVVGILK.[I]	P47755 [179-193]			0	1604.93
118	P47755	CAPZA2	[K].FIIHAPPGEFNEVFNDVR.[L]	P47755 [20-37]			0	2101.05	-0.196478		-0.0562601							-0.1067	0.214658		0.115584	-0.115145					0.0452967							-0.315405		0.335588			-0.0114337	1.09843
118	P47755; P52907	CAPZA2	[K].IQVHYYEDGNVQLVSHK.[D]	P47755 [194-210]; P52907 [194-210]			0	2029.01
118	P47755	CAPZA2	[K].IDGQQTIIACIESHQFQAK.[N]	P47755 [148-166]	1xCarbamidomethyl [C10]		0	2187.09																											-0.699136	-0.359663
118	P47755; P52907	CAPZA2	[R].LLLNNDNLLR.[E]	P47755 [38-47]; P52907 [38-47]			0	1197.69	-0.0304728						-0.03551																											-0.0265143	-0.0580114	-0.120799	-0.149735	-0.0857248		-0.0982926	-0.0584314
118	P47755	CAPZA2	[R].EGAAHAFAQYNLDQFTPVK.[I]	P47755 [48-66]			0	2107.02
119	O75083	WDR1	[K].SYIYSGSHDGHINYWDSETGENDSFAGK.[G]	O75083 [335-362]			0	3136.32	-0.101931
119	O75083	WDR1	[R].LHHVSSLAWLDEHTLVTTSHDASVK.[E]	O75083 [576-600]			0	2783.41	0.0468129
119	O75083	WDR1	[R].NIDNPALADIYTEHAHQVVVAK.[Y]	O75083 [44-65]			0	2418.24	-0.0736269					-0.193155									-0.0302576				0.818432													0.623311	-0.47682
119	O75083	WDR1	[K].CFSIDNPGYEPEVVAVHPGGDTVAIGGVDGNVR.[L]	O75083 [438-470]	1xCarbamidomethyl [C1]		0	3397.61	0.00400569
119	O75083	WDR1	[K].VVTVFSVADGYSENNVFYGHHAK.[I]	O75083 [512-534]			0	2540.22	-0.0253333
120	Q12906	ILF3	[K].EPPLSLTIHLTSPVVR.[E]	Q12906 [162-177]			0	1759.01
120	Q12906	ILF3	[K].HSSVYPTQEELEAVQNMVSHTER.[A]	Q12906 [18-40]			0	2671.24	-0.0740888																															-0.385547
120	Q12906	ILF3	[K].VLAGETLSVNDPPDVLDR.[Q]	Q12906 [183-200]			0	1909.99																		-0.482647					-0.138089	-0.0336493	-0.165832
120	Q12906	ILF3	[K].VADNLAIQLAAVTEDK.[Y]	Q12906 [128-143]			0	1670.9
120	Q12906	ILF3	[K].YELISETGGSHDK.[R]	Q12906 [541-553]			0	1435.67										0.0794377									0.449375
120	Q12906	ILF3	[K].YEILQSVDDAAIVIK.[N]	Q12906 [144-158]			0	1676.91
120	Q12906	ILF3	[K].VLQDMGLPTGAEGR.[D]	Q12906 [461-474]			0	1443.73
120	Q12906	ILF3	[K].NTKEPPLSLTIHLTSPVVR.[E]	Q12906 [159-177]			1	2102.2
120	Q12906	ILF3	[R].VLECLASGIVMPDGSGIYDPCEK.[E]	Q12906 [275-297]	2xCarbamidomethyl [C4; C21]		0	2510.16	0.213773	-0.193754													-0.395841																							-0.588628	-0.588632		-0.448652
120	Q12906	ILF3	[K].GDLDLELVLLCK.[E]	Q12906 [106-117]	1xCarbamidomethyl [C11]		0	1387.75
120	Q12906	ILF3	[K].AVSDWIDEQEK.[G]	Q12906 [44-54]			0	1319.61	-0.290148
120	Q12906	ILF3	[R].EDITQSAQHALR.[L]	Q12906 [312-323]			0	1368.69								-0.297237												-0.0847243				1.23437	0.350767											-1.60808
120	Q12906	ILF3	[K].VLGMDPLPSK.[M]	Q12906 [333-342]			0	1056.58
120	Q12906	ILF3	[R].VLECLASGIVMPDGSGIYDPCEK.[E]	Q12906 [275-297]	2xCarbamidomethyl [C4; C21]; 1xOxidation [M11]		0	2526.16
120	Q12906	ILF3	[K].EATDAIGHLDR.[Q]	Q12906 [298-308]			0	1197.59
120	Q12906	ILF3	[R].LNQLKPGLQYK.[L]	Q12906 [409-419]			0	1301.76																									-0.484964		0.791142
120	Q12906	ILF3	[K].SIGTANRPMGAGEALR.[R]	Q12906 [258-273]			0	1600.82										0.0975254													-0.792434
120	Q12906	ILF3	[K].LFPDTPLALDANK.[K]	Q12906 [588-600]			0	1414.76
121	Q96C23	GALM	[R].ISPDGEEGYPGELK.[V]	Q96C23 [132-145]			0	1490.7					-0.227233	-0.236063		-0.244963		-0.287548
121	Q96C23	GALM	[R].VDIISWGCTITALEVK.[D]	Q96C23 [31-46]	1xCarbamidomethyl [C8]		0	1804.95		-0.313515						-0.199643																											-0.533746		0.00209591
121	Q96C23	GALM	[R].VLEVYTTQPGVQFYTGNFLDGTLK.[G]	Q96C23 [268-291]			0	2690.37								-0.157238			-0.189839			-0.0746486
121	Q96C23	GALM	[R].FPPVLLRPGEEYDHTTWFK.[F]	Q96C23 [320-338]			0	2332.18								-0.0452396	-0.496911	-0.370424	0.0991878									-0.0932556	-0.0776714				-0.192361				0.385415									-1.41296			-0.267585
121	Q96C23	GALM	[R].ASDVVLGFAELEGYLQK.[Q]	Q96C23 [52-68]			0	1838.95								-0.1853
121	Q96C23	GALM	[R].AVFGELPSGGGTVEK.[F]	Q96C23 [7-21]			0	1447.74
121	Q96C23	GALM	[K].EYHLAINKEPNSLHGGVR.[G]	Q96C23 [94-111]			1	2034.05								-0.118573
121	Q96C23	GALM	[K].HSGFCLETQNWPDAVNQPR.[F]	Q96C23 [301-319]	1xCarbamidomethyl [C5]		0	2256.03								-0.145548																	-0.242174
121	Q96C23	GALM	[K].HLQDFHLNGFDHNFCLK.[G]	Q96C23 [233-249]	1xCarbamidomethyl [C15]		0	2142
121	Q96C23	GALM	[K].FQLQSDLLR.[V]	Q96C23 [22-30]			0	1119.62	0.191727							-0.121223																						0.0367486
121	Q96C23	GALM	[R].VLSNGVQFSR.[I]	Q96C23 [122-131]			0	1106.6								-0.13489
122	Q9UBQ7	GRHPR	[R].GDVVNQDDLYQALASGK.[I]	Q9UBQ7 [246-262]			0	1792.87																																		0.79386
122	Q9UBQ7	GRHPR	[K].IAAAGLDVTSPEPLPTNHPLLTLK.[N]	Q9UBQ7 [263-286]			0	2468.38	-0.0527831
122	Q9UBQ7	GRHPR	[K].NCVILPHIGSATHR.[T]	Q9UBQ7 [287-300]	1xCarbamidomethyl [C2]		0	1574.82
123	P17174	GOT1	[K].EPESILQVLSQMEK.[I]	P17174 [277-290]			0	1630.84																										-0.193305	-0.232082	-0.208155
123	P17174	GOT1	[R].FLFPFFDSAYQGFASGNLER.[D]	P17174 [217-236]			0	2313.1																					-0.102959					-0.102471	-0.130318	-0.107089
123	P17174	GOT1	[K].NLDYVATSIHEAVTK.[I]	P17174 [397-411]			0	1660.85																				-0.148246	-0.0832748		0.598138	-0.368252		-0.154203	-0.138699	-0.130172											-0.280468
123	P17174	GOT1	[K].IANDNSLNHEYLPILGLAEFR.[S]	P17174 [61-81]			0	2399.24										0.412338		-0.0745638							0.339013	0.0584621	-0.180117	0.203276			-0.11999	-0.146417	-0.144319	-0.12235		-0.33114	-0.00445529				0.198768					0.140762
123	P17174	GOT1	[R].IVASTLSNPELFEEWTGNVK.[T]	P17174 [306-325]			0	2234.13	-0.0445184																		0.816023									-0.131364													0.691558
123	P17174	GOT1	[R].TDDCHPWVLPVVK.[K]	P17174 [43-55]	1xCarbamidomethyl [C4]		0	1565.78																					-0.204101					-0.144072	-0.115332	-0.104505
123	P17174	GOT1	[K].TPGTWNHITDQIGMFSFTGLNPK.[Q]	P17174 [347-369]			0	2562.24																												-0.0506681							-0.0734064
123	P17174	GOT1	[K].NTPVYVSSPTWENHNAVFSAAGFK.[D]	P17174 [131-154]			0	2623.26																				-0.802487	-0.264038				-0.0789143	-0.180977	-0.010321	-0.121347										-0.504007
123	P17174	GOT1	[R].VGGVQSLGGTGALR.[I]	P17174 [101-114]			0	1271.71																		0.407797		-0.0487247	0.241298				0.616188		-0.0907526	-0.0878537			0.34122
123	P17174	GOT1	[R].GLDLQGFLNDLENAPEFSIVVLHACAHNPTGIDPTPEQWK.[Q]	P17174 [168-207]	1xCarbamidomethyl [C25]		0	4443.17																					-0.291355					-0.0847066		-0.215378
123	P17174	GOT1	[R].LALGDDSPALK.[E]	P17174 [87-97]			0	1099.6	0.779877																										-0.144076	-0.148969
123	P17174	GOT1	[R].KVNLGVGAYR.[T]	P17174 [33-42]			1	1076.62																												-0.0479795	-0.343949
123	P17174	GOT1	[R].ITWSNPPAQGAR.[I]	P17174 [294-305]			0	1297.66	-0.398294																							0.820328	0.005017			-0.134245								-0.139543		-1.21636
123	P17174	GOT1	[K].RVGGVQSLGGTGALR.[I]	P17174 [100-114]			1	1427.81
123	P17174	GOT1	[K].NFGLYNER.[V]	P17174 [260-267]			0	1012.48
124	P63104	YWHAZ	[K].TAFDEAIAELDTLSEESYK.[D]	P63104 [194-212]			0	2131.99
124	P63104	YWHAZ	[K].SVTEQGAELSNEER.[N]	P63104 [28-41]			0	1548.71																																									-0.020241
124	P63104	YWHAZ	[K].KGIVDQSQQAYQEAFEISK.[K]	P63104 [139-157]			1	2169.08	-0.0875666
124	P63104	YWHAZ	[K].GIVDQSQQAYQEAFEISK.[K]	P63104 [140-157]			0	2040.99	0.00826851
124	P63104	YWHAZ	[R].YLAEVAAGDDK.[K]	P63104 [128-138]			0	1151.56												1.08086
124	P63104	YWHAZ	[K].FLIPNASQAESK.[V]	P63104 [104-115]			0	1304.68	-0.340713
124	P63104	YWHAZ	[K].GIVDQSQQAYQEAFEISKK.[E]	P63104 [140-158]			1	2169.08
124	P63104	YWHAZ	[R].DICNDVLSLLEK.[F]	P63104 [92-103]	1xCarbamidomethyl [C3]		0	1418.72	-0.0831371
124	P63104	YWHAZ	[R].DNLTLWTSDTQGDEAEAGEGGEN.[-]	P63104 [223-245]			0	2409
124	P63104; P31947; P31946; Q04917; P61981; P27348; P62258	YWHAZ	[K].DSTLIMQLLR.[D]	P63104 [213-222]; P31947 [215-224]; P31946 [215-224]; Q04917 [218-227]; P61981 [218-227]; P27348 [213-222]; P62258 [216-225]	1xOxidation [M6]		0	1205.66
124	P63104; P31947; P31946; Q04917; P61981; P27348; P62258	YWHAZ	[K].DSTLIMQLLR.[D]	P63104 [213-222]; P31947 [215-224]; P31946 [215-224]; Q04917 [218-227]; P61981 [218-227]; P27348 [213-222]; P62258 [216-225]			0	1189.66
124	P63104	YWHAZ	[K].KGIVDQSQQAYQEAFEISKK.[E]	P63104 [139-158]			2	2297.18
124	P63104	YWHAZ	[R].YLAEVAAGDDKK.[GV]	P63104 [128-139]			1	1279.65																											0.111638										-0.159608				-0.559899
124	P63104	YWHAZ	[K].TAFDEAIAELDTLSEESYKDSTLIMQLLR.[D]	P63104 [194-222]			1	3302.63
124	P63104	YWHAZ	[R].DICNDVLSLLEKFLIPNASQAESK.[V]	P63104 [92-115]	1xCarbamidomethyl [C3]		1	2704.39
124	P63104; P31946; P27348	YWHAZ	[K].KEMQPTHPIR.[L]	P63104 [158-167]; P31946 [160-169]; P27348 [158-167]			1	1236.65																																				0.339256
124	P63104; P31946; P27348	YWHAZ	[K].EMQPTHPIR.[L]	P63104 [159-167]; P31946 [161-169]; P27348 [159-167]			0	1108.56
125	A0A0G2JMM1	LILRB3; LOC107987462	[R].CHYYSSAGWSEPSDPLEMVMTGAYSKPTLSALPSPVVASGGNMTLR.[C]	A0A0G2JMM1 [98-143]	1xCarbamidomethyl [C1]; 2xOxidation [M20; M43]		0	4934.28				0.34409		0.374316			0.324414	0.897916			-0.0782852			-0.258163		0.144898	0.193489	-0.208724			-0.239532		-0.167065		-0.0584426					-0.104599		-0.0121195		-0.200634		0.0379847	-0.285246		-0.00518586
126	P62701	RPS4X	[K].VNDTIQIDLETGK.[I]	P62701 [156-168]			0	1445.75																										0.443384		0.238475							0.108494	-0.00216268
126	P62701	RPS4X	[K].GIPHLVTHDAR.[T]	P62701 [135-145]			0	1215.66							-0.0474229			0.286564										-0.621602
126	P62701	RPS4X	[R].ERHPGSFDVVHVK.[D]	P62701 [199-211]			1	1506.78							0.99043					-0.651032															1.27396
126	P62701	RPS4X	[K].FDTGNLCMVTGGANLGR.[I]	P62701 [175-191]	1xCarbamidomethyl [C7]; 1xOxidation [M8]		0	1798.82
126	P62701	RPS4X	[R].HPGSFDVVHVK.[D]	P62701 [201-211]			0	1221.64																																				-1.02295
126	P62701	RPS4X	[K].LTGVFAPRPSTGPHK.[L]	P62701 [23-37]			0	1564.86
126	P62701	RPS4X	[K].YALTGDEVKK.[I]	P62701 [54-63]			1	1123.6
126	P62701	RPS4X	[K].LRECLPLIIFLR.[N]	P62701 [38-49]	1xCarbamidomethyl [C4]		1	1542.92
126	P62701	RPS4X	[K].GNKPWISLPR.[G]	P62701 [231-240]			0	1167.66
127	P30038	ALDH4A1	[K].VANEPVLAFTQGSPER.[D]	P30038 [32-47]			0	1714.88	-0.0407305
127	P30038	ALDH4A1	[K].VGDPAEDFGTFFSAVIDAK.[S]	P30038 [377-395]			0	1985.95	-0.395701																																0.0197099	0.00184552	-0.0695679	-0.0489953
127	P30038	ALDH4A1	[R].SADVESVVSGTLR.[S]	P30038 [326-338]			0	1319.68
127	P30038	ALDH4A1	[R].ASGTNDKPGGPHYILR.[W]	P30038 [525-540]			0	1682.86
127	P30038	ALDH4A1	[K].STGSIVGQQPFGGAR.[A]	P30038 [510-524]			0	1461.74	0.27843																					-0.781903	-0.410489
127	P30038	ALDH4A1	[R].LYVPHSLWPQIK.[G]	P30038 [354-365]			0	1480.83																																	0.359925		0.0377143
127	P30038	ALDH4A1	[R].KEWDLKPIADR.[A]	P30038 [114-124]			1	1370.74	0.11317																																		0.104262
127	P30038	ALDH4A1	[R].IKVGDPAEDFGTFFSAVIDAK.[S]	P30038 [375-395]			1	2227.13
127	P30038	ALDH4A1	[R].SSPSLTILAGGK.[C]	P30038 [409-420]			0	1130.64	0.170115
128	Q9BY43	CHMP4A	[R].EAIENATTNAEVLR.[T]	Q9BY43 [91-104]			0	1530.78																									0.222564
128	Q9BY43	CHMP4A	[K].LPSVPSTHLPAGPAPK.[V]	Q9BY43 [191-206]			0	1568.88
129	Q9UKM9	RALY	[R].VFIGNLNTALVK.[K]	Q9UKM9 [23-34]			0	1288.76
129	Q9UKM9	RALY	[R].TRDDGDEEGLLTHSEEELEHSQDTDADDGALQ.[-]	Q9UKM9 [275-306]			1	3527.48
129	Q9UKM9	RALY	[R].VLAGQTLDINMAGEPKPDRPK.[G]	Q9UKM9 [79-99]	1xOxidation [M11]		0	2266.19
129	Q9UKM9	RALY	[K].SDVETIFSK.[Y]	Q9UKM9 [36-44]			0	1025.51
129	Q9UKM9	RALY	[K].GYAFVQYSNER.[H]	Q9UKM9 [56-66]			0	1333.62
130	P31948	STIP1	[K].ALSVGNIDDALQCYSEAIK.[L]	P31948 [14-32]	1xCarbamidomethyl [C13]		0	2067.01	-0.0509827
130	P31948	STIP1	[K].AAALEFLNRFEEAK.[R]	P31948 [79-92]			1	1608.84
130	P31948	STIP1	[K].LLEFQLALK.[D]	P31948 [407-415]			0	1074.66
130	P31948	STIP1	[R].IGNSYFKEEK.[Y]	P31948 [306-315]			1	1214.61
131	P61160	ACTR2	[R].FEAPEALFQPHLINVEGVGVAELLFNTIQAADIDTR.[S]	P61160 [259-294]			0	3938.03
131	P61160	ACTR2	[K].LCYVGYNIEQEQK.[L]	P61160 [220-232]	1xCarbamidomethyl [C2]		0	1643.77			0.0160213				-0.350381		-0.949869																	-0.176246		0.411132
131	P61160	ACTR2	[R].GYAFNHSADFETVR.[M]	P61160 [201-214]			0	1613.73
132	Q15493	RGN	[R].VTMDAPVSSVALR.[Q]	Q15493 [52-64]			0	1345.71
132	Q15493	RGN	[K].YFDQVDISNGLDWSLDHK.[I]	Q15493 [146-163]			0	2152								-0.20987
132	Q15493	RGN	[R].CGESPVWEEVSNSLLFVDIPAK.[K]	Q15493 [16-37]	1xCarbamidomethyl [C1]		0	2476.21								-0.201813
132	Q15493	RGN	[K].EEQIPDGMCIDAEGK.[L]	Q15493 [199-213]	1xCarbamidomethyl [C9]		0	1691.73								-0.236461		-0.456039
132	Q15493	RGN	[K].EQSAVVLATVDNDKK.[N]	Q15493 [84-98]			1	1616.85
132	Q15493	RGN	[K].IECVLPENCR.[C]	Q15493 [6-15]	2xCarbamidomethyl [C3; C9]		0	1289.6								-0.167116
132	Q15493	RGN	[R].HQGALYSLFPDHHVK.[K]	Q15493 [130-144]			0	1748.89								0.371852
133	Q9UIJ7	AK3	[R].VYNIEFNPPK.[T]	Q9UIJ7 [137-146]			0	1220.63																		-0.23517
133	Q9UIJ7	AK3	[K].TVGIDDLTGEPLIQR.[E]	Q9UIJ7 [147-161]			0	1626.87
134	H3BND4	PDXDC1; LOC102724985	[R].LSSGPEQITLEASSTEGHPGAPSPQHTDQTEAFQK.[G]	H3BND4 [753-787]			0	3662.72
134	H3BND4	PDXDC1; LOC102724985	[R].GSDALSETSSVSHIEDLEK.[V]	H3BND4 [731-749]			0	2003.94
134	H3BND4	PDXDC1; LOC102724985	[K].GVPHPEDDHSQVEGPESLR.[-]	H3BND4 [788-806]			0	2084.96
135	Q16881	TXNRD1	[K].VVYENAYGQFIGPHR.[I]	Q16881 [275-289]			0	1749.87
135	Q16881	TXNRD1	[R].VVGFHVLGPNAGEVTQGFAAALK.[C]	Q16881 [585-607]			0	2282.23	0.0468455																											-0.0373586
135	Q16881	TXNRD1	[R].FLIATGERPR.[Y]	Q16881 [307-316]			0	1159.66
136	P46109	CRKL	[K].IHYLDTTTLIEPAPR.[Y]	P46109 [90-104]			0	1739.93																																				-0.246746
137	Q9UQ80	PA2G4	[R].ITSGPFEPDLYK.[S]	Q9UQ80 [333-344]			0	1366.69	-0.00150565							0.193241
137	Q9UQ80	PA2G4	[K].IDLGVHVDGFIANVAHTFVVDVAQGTQVTGR.[K]	Q9UQ80 [108-138]			0	3235.69		-0.125923
137	Q9UQ80	PA2G4	[K].HELLQPFNVLYEK.[E]	Q9UQ80 [299-311]			0	1629.86																										-0.485087							0.390559
137	Q9UQ80	PA2G4	[R].LVKPGNQNTQVTEAWNK.[V]	Q9UQ80 [156-172]			0	1927
138	P35270	SPR	[R].TLAPLLASLLSPGSVLVLSAR.[N]	P35270 [22-42]			0	2078.26			-1.54915	-1.02247	0.15593			-0.039537																					-0.438363	-0.788186		-0.179746	-0.128516		-0.591229	-0.0353018	0.172735
138	P35270	SPR	[R].VPADLGAEAGLQQLLGALR.[E]	P35270 [66-84]			0	1892.06																																	-0.0114114
138	P35270	SPR	[R].LLLINNAGSLGDVSK.[G]	P35270 [95-109]			0	1513.86																													-0.0930612				-0.0598527			-0.0651015
138	P35270	SPR	[R].VLNYAPGPLDTDMQQLAR.[E]	P35270 [193-210]	1xOxidation [M13]		0	2018
138	P35270	SPR	[K].LLSLLEKDEFK.[S]	P35270 [241-251]			1	1334.76	0.0905635																																			-0.122587					-0.639143
139	A0A087WTP3	KHSRP	[K].MILIQDGSQNTNVDKPLR.[I]	A0A087WTP3 [267-284]			0	2042.07																													-0.114398			0.158195	0.0542953
139	A0A087WTP3	KHSRP	[K].LASQGDSISSQLGPIHPPPR.[T]	A0A087WTP3 [123-142]			0	2057.08												-0.4025									0.139647	0.0526938			-0.107854	-0.551169			-0.208249			-0.0977296	0.00456483
139	A0A087WTP3	KHSRP	[K].IGGDAATTVNNSTPDFGFGGQK.[R]	A0A087WTP3 [88-109]			0	2154.01
139	A0A087WTP3	KHSRP	[R].GGGGPGGGGPGGGSAGGPSQPPGGGGPGIR.[K]	A0A087WTP3 [41-70]			0	2270.07					-0.797827					0.134331														-0.708252													0.656789
139	A0A087WTP3	KHSRP	[R].IGGGIDVPVPR.[H]	A0A087WTP3 [321-331]			0	1079.62																													0.12359			0.037823	0.0966834		0.0976148
139	A0A087WTP3	KHSRP	[K].IGQQPQQPGAPPQQDYTK.[A]	A0A087WTP3 [629-646]			0	1980.98
139	A0A087WTP3	KHSRP	[K].AINQQTGAFVEISR.[Q]	A0A087WTP3 [449-462]			0	1533.8
139	A0A087WTP3	KHSRP	[K].VQISPDSGGLPER.[S]	A0A087WTP3 [178-190]			0	1354.7
140	P40926	MDH2	[K].GCDVVVIPAGVPR.[K]	P40926 [92-104]	1xCarbamidomethyl [C2]		0	1338.72
140	P40926	MDH2	[R].LTLYDIAHTPGVAADLSHIETK.[A]	P40926 [53-74]			0	2365.24	-0.0624195																															-0.792673				-0.0405949	0.0351998		-0.0246852		-0.000668421
140	P40926	MDH2	[K].VAVLGASGGIGQPLSLLLK.[N]	P40926 [27-45]			0	1793.09	-0.0861249																																		-0.077277	-0.00614954	-0.0600169	-0.0866183	0.00704257
140	P40926	MDH2	[K].MISDAIPELK.[A]	P40926 [315-324]	1xOxidation [M1]		0	1132.59
140	P40926	MDH2	[R].IQEAGTEVVK.[A]	P40926 [230-239]			0	1073.58																																			-0.721561
140	P40926	MDH2	[K].MISDAIPELK.[A]	P40926 [315-324]			0	1116.6	0.1029							-0.548023																												0.391379
140	P40926	MDH2	[K].SQETECTYFSTPLLLGK.[K]	P40926 [280-296]	1xCarbamidomethyl [C6]		0	1973.95				-0.249581							-0.412884														-0.401445				0.416739					-0.108762		-0.534273		-1.04401		-1.56249
140	P40926	MDH2	[K].VDFPQDQLTALTGR.[I]	P40926 [216-229]			0	1560.8
140	P40926	MDH2	[R].VNVPVIGGHAGK.[T]	P40926 [192-203]			0	1147.66																																				-0.0714103	-0.0202994				0.878252
140	P40926	MDH2	[R].FVFSLVDAMNGK.[E]	P40926 [258-269]			0	1327.67
140	P40926	MDH2	[K].EGVVECSFVK.[S]	P40926 [270-279]	1xCarbamidomethyl [C6]		0	1153.56
140	P40926	MDH2	[K].AGAGSATLSMAYAGAR.[F]	P40926 [242-257]			0	1454.71
140	P40926	MDH2	[K].AGAGSATLSMAYAGAR.[F]	P40926 [242-257]	1xOxidation [M10]		0	1470.7																					0.151923
140	P40926	MDH2	[K].TIIPLISQCTPK.[V]	P40926 [204-215]	1xCarbamidomethyl [C9]		0	1370.77																																				-0.0672749
140	P40926	MDH2	[K].GYLGPEQLPDCLK.[G]	P40926 [79-91]	1xCarbamidomethyl [C11]		0	1489.74	-0.0139644																	-0.541239																		-0.163553
140	P40926	MDH2	[K].IFGVTTLDIVR.[A]	P40926 [166-176]			0	1233.72																																				-0.041594	0.0121306
141	P01019	AGT	[K].QPFVQGLALYTPVVLPR.[S]	P01019 [221-237]			0	1898.09																													-0.0807021			-0.0971569
141	P01019	AGT	[R].SLDFTELDVAAEK.[I]	P01019 [238-250]			0	1437.71
141	P01019	AGT	[K].VLSALQAVQGLLVAQGR.[A]	P01019 [180-196]			0	1723.02																													-0.244024	-0.230474		-0.371655
141	P01019	AGT	[K].DPTFIPAPIQAK.[T]	P01019 [64-75]			0	1297.72																																1.13587
141	P01019	AGT	[R].ADSQAQLLLSTVVGVFTAPGLHLK.[Q]	P01019 [197-220]			0	2465.38	-0.693525				-0.00207969														0.0937144					0.0874368					-0.156858	-0.122343		1.13056	-0.214145		-0.207538		-0.230803	-0.0381995
141	P01019	AGT	[K].ANAGKPKDPTFIPAPIQAK.[T]	P01019 [57-75]			1	1964.1																													-0.202946	-0.252347		-0.217148	-0.294515		-0.974431
141	P01019	AGT	[K].ALQDQLVLVAAK.[L]	P01019 [83-94]			0	1268.76																													-0.176966			-0.162538	-0.340554
141	P01019	AGT	[R].TIHLTMPQLVLQGSYDLQDLLAQAELPAILHTELNLQK.[L]	P01019 [376-413]			0	4268.3
142	Q5T9B7	AK1	[K].YGYTHLSTGDLLR.[S]	Q5T9B7 [48-60]			0	1495.75
142	Q5T9B7	AK1	[K].GQLVPLETVLDMLR.[D]	Q5T9B7 [80-93]			0	1583.88																																						-0.138002
142	Q5T9B7	AK1	[K].VNAEGSVDSVFSQVCTHLDALK.[-]	Q5T9B7 [189-210]	1xCarbamidomethyl [C15]		0	2376.15		0.412108						0.214608																								-0.0771908						-0.0694739		-0.0699697
143	Q16629; P84103	SRSF7	[R].NPPGFAFVEFEDPR.[D]	Q16629 [45-58]; P84103 [44-57]			0	1621.76	-0.217716																								-0.618601													-0.112837
143	Q16629	SRSF7	[R].NPPGFAFVEFEDPRDAEDAVR.[G]	Q16629 [45-65]			1	2378.1	-0.0436952													-0.390649
144	Q3LXA3	DAK; TKFC	[R].LEQPDPGAVAAAAILR.[A]	Q3LXA3 [552-567]			0	1591.88
144	Q3LXA3	DAK; TKFC	[R].TMLDSLWAAGQELQAWK.[S]	Q3LXA3 [494-510]			0	1947.96	-0.0251618
144	Q3LXA3	DAK; TKFC	[K].KLVNSVAGCADDALAGLVACNPNLQLLQGHR.[V]	Q3LXA3 [5-35]	2xCarbamidomethyl [C9; C20]		1	3274.68	-0.034932
145	H3BQK0	DDX19B	[R].SNLVDNTNQVEVLQR.[D]	H3BQK0 [73-87]			0	1728.89																							0.295237
146	Q96HC4	PDLIM5	[R].IGDVVLSIDGINAQGMTHLEAQNK.[I]	Q96HC4 [46-69]			0	2523.29																																						0.105986
146	Q96HC4	PDLIM5	[R].ASAAPKPEPVPVQK.[G]	Q96HC4 [84-97]			0	1418.8																																			-0.303325
146	Q96HC4	PDLIM5	[K].EVVKPVPITSPAVSK.[V]	Q96HC4 [102-116]			0	1550.92																																	-0.17628		-0.248227		-0.0781745
146	Q96HC4	PDLIM5	[K].GCTGSLNMTLQR.[A]	Q96HC4 [72-83]	1xCarbamidomethyl [C2]		0	1337.63
147	P39748	FEN1	[K].EAHQLFLEPEVLDPESVELK.[W]	P39748 [278-297]			0	2322.19	-0.070099																																			-0.049393
147	P39748	FEN1	[K].LIADVAPSAIR.[E]	P39748 [9-19]			0	1125.66	-0.148944					0.967594				1.15675									0.522497						1.35533				0.613649			-0.0590237
148	P09622	DLD	[K].IPNIYAIGDVVAGPMLAHK.[A]	P09622 [347-365]			0	1979.08																										-0.335455		0.769554										0.528859		0.000614409	0.129433
148	P09622	DLD	[K].NLGLEELGIELDPR.[G]	P09622 [321-334]			0	1567.83																																			-0.266452					-0.0502806
148	P09622	DLD	[K].ALTGGIAHLFK.[Q]	P09622 [133-143]			0	1127.66	-0.194451																																							-0.0165379
148	P09622	DLD	[K].NETLGGTCLNVGCIPSK.[A]	P09622 [73-89]	2xCarbamidomethyl [C8; C13]		0	1819.87	0.0265335																																			0.20901		0.121575	-0.0582454	-0.0292955	-0.307397
148	P09622	DLD	[K].SEEQLKEEGIEYK.[V]	P09622 [405-417]			1	1581.76
148	P09622	DLD	[R].VLGAHILGPGAGEMVNEAALALEYGASCEDIAR.[V]	P09622 [450-482]	1xCarbamidomethyl [C28]		0	3354.65
149	A0A286YFF7	PPT1	[K].TLMEDVENSFFLNVNSQVTTVCQALAK.[D]	A0A286YFF7 [104-130]	1xCarbamidomethyl [C22]		0	3058.49
149	A0A286YFF7	PPT1	[K].LQQGYNAMGFSQGGQFLR.[A]	A0A286YFF7 [134-151]	1xOxidation [M8]		0	2017.95
149	A0A286YFF7	PPT1	[R].LVQAEYWHDPIKEDVYR.[N]	A0A286YFF7 [209-225]			1	2161.07	0.0280837																				-0.086055
149	A0A286YFF7	PPT1	[R].LVQAEYWHDPIK.[E]	A0A286YFF7 [209-220]			0	1498.77
149	A0A286YFF7	PPT1	[R].CPGESSHICDFIR.[K]	A0A286YFF7 [181-193]	2xCarbamidomethyl [C1; C9]		0	1577.68
149	A0A286YFF7	PPT1	[K].ETIPLQETSLYTQDR.[L]	A0A286YFF7 [283-297]			0	1793.89												0.326486		0.13642							-0.0906919	-0.0440988	-0.140218	0.116418	0.28804	-0.0539402								0.0065951				1.07859		0.294906
149	A0A286YFF7	PPT1	[K].KIPGIYVLSLEIGK.[T]	A0A286YFF7 [90-103]			1	1529.93																					0.0073971
150	Q92522	H1FX	[K].YSQLVVETIR.[R]	Q92522 [48-57]			0	1207.67
150	Q92522	H1FX	[K].ALVQNDTLLQVK.[G]	Q92522 [95-106]			0	1341.77																																		-0.661999
150	Q92522	H1FX	[K].KVPWFDQQNGR.[T]	Q92522 [76-86]			1	1374.69																																						0.558137
151	P42766	RPL35	[R].VLTVINQTQK.[E]	P42766 [57-66]			0	1143.67
151	P42766	RPL35	[K].YKPLDLRPK.[K]	P42766 [78-86]			0	1129.67
152	D6RBZ0	HNRNPAB	[K].IFVGGLNPEATEEK.[I]	D6RBZ0 [156-169]			0	1503.77	-0.000393138			0.22798																	-0.000493108									-0.263883				-1.17215							-1.11836
153	P06732	CKM	[R].LGSSEVEQVQLVVDGVK.[L]	P06732 [342-358]			0	1785.96
153	P06732	CKM	[K].SFLVWVNEEDHLR.[V]	P06732 [224-236]			0	1643.82
154	O00764	PDXK	[K].GQVLNSDELQELYEGLR.[L]	O00764 [54-70]			0	1962.98																													-0.0806682			-0.176031
154	O00764	PDXK	[K].VVPLADIITPNQFEAELLSGR.[K]	O00764 [140-160]			0	2282.24																													-0.0990297			-0.158136	-0.153697		-0.187941
154	O00764	PDXK	[K].SFLAMVVDIVQELKQQNPR.[L]	O00764 [89-107]			1	2215.19
154	O00764	PDXK	[R].KIHSQEEALR.[V]	O00764 [161-170]			1	1210.65																																-0.204348	-0.172696
154	O00764	PDXK	[R].VLSIQSHVIR.[G]	O00764 [7-16]			0	1151.69																																-0.0404393
154	O00764	PDXK	[K].WDGEGSMYVPEDLLPVYK.[E]	O00764 [120-137]			0	2097.98
154	O00764	PDXK	[K].AQAGEGVRPSPMQLELR.[M]	O00764 [276-292]			0	1838.95																										-0.0307282			-0.196024			-0.146038	-0.13593	-1.5784	-0.0184156
154	O00764	PDXK	[R].LVYVCDPVLGDK.[W]	O00764 [108-119]	1xCarbamidomethyl [C5]		0	1377.71																										-0.141813						-0.176796	-0.171307		-0.10353
154	O00764	PDXK	[K].TVSTLHHVLQR.[T]	O00764 [259-269]			0	1290.73								0.0745685																					-0.0775418			-0.050403	-0.0768751		0.00674103
154	O00764	PDXK	[K].IHSQEEALR.[V]	O00764 [162-170]			0	1082.56
154	O00764	PDXK	[K].RDIEDPEIVVQATVL.[-]	O00764 [298-312]			1	1696.91															0.143834														-0.153565			-0.078243	-0.247077
155	J3KQE5	RAN	[R].VCENIPIVLCGNK.[V]	J3KQE5 [129-141]	2xCarbamidomethyl [C2; C10]		0	1515.77	0.0356755
155	J3KQE5	RAN	[K].NLQYYDISAK.[S]	J3KQE5 [161-170]			0	1214.61
155	J3KQE5	RAN	[K].FNVWDTAGQEK.[F]	J3KQE5 [79-89]			0	1294.61	0.0919589
155	J3KQE5	RAN	[K].RHLTGEFEK.[K]	J3KQE5 [47-55]			1	1116.58
155	J3KQE5	RAN	[K].LVLVGDGGTGK.[T]	J3KQE5 [31-41]			0	1015.58
156	Q15181	PPA1	[R].YKVPDGKPENEFAFNAEFK.[D]	Q15181 [193-211]			1	2230.08	0.255901																												0.470642	0.409608	0.736114	0.66485	0.653531
156	Q15181	PPA1	[K].VIAINVDDPDAANYNDINDVK.[R]	Q15181 [156-176]			0	2288.1							0.938736																						-0.132707	-0.165364
156	Q15181	PPA1	[K].VIAINVDDPDAANYNDINDVKR.[L]	Q15181 [156-177]			1	2444.21	0.0724034						-0.741599				-1.0155		-0.676776																-0.25048	-0.170966	-0.16225	-0.453281	-0.327486								-0.987109
156	Q15181	PPA1	[K].GISCMNTTLSESPFK.[C]	Q15181 [239-253]	1xCarbamidomethyl [C4]		0	1671.77
156	Q15181	PPA1	[K].GISCMNTTLSESPFK.[C]	Q15181 [239-253]	1xCarbamidomethyl [C4]; 1xOxidation [M5]		0	1687.77																			0.0792572					0.5987					-0.145251	-0.0973265		-0.188431
156	Q15181	PPA1	[K].GQYISPFHDIPIYADK.[D]	Q15181 [26-41]			0	1863.93																													0.00616478	-0.124119						-0.704418
156	Q15181	PPA1	[K].HTGCCGDNDPIDVCEIGSK.[V]	Q15181 [110-128]	3xCarbamidomethyl [C4; C5; C14]		0	2133.86																														-0.0863488
156	Q15181	PPA1	[R].AIVDALPPPCESACTVPTDVDK.[W]	Q15181 [261-282]	2xCarbamidomethyl [C10; C14]		0	2355.12																													-0.150037	-0.175081
156	Q15181	PPA1	[K].GYIWNYGAIPQTWEDPGHNDK.[H]	Q15181 [89-109]			0	2461.12	0.00640701																		-0.777997											-1.31982
156	Q15181	PPA1	[K].MEIATKDPLNPIK.[Q]	Q15181 [58-70]	1xOxidation [M1]		1	1485.8																													-0.0467943	-0.0958221
157	Q14847	LASP1	[R].RPLEQQQPHHIPTSAPVYQQPQQQPVAQSYGGYKEPAAPVSIQR.[S]	Q14847 [154-197]			1	4934.51
157	Q14847	LASP1	[K].GFSVVADTPELQR.[I]	Q14847 [97-109]			0	1418.73	-0.0203122																				-0.132165	-0.168436												-0.0399296
157	Q14847	LASP1	[K].KTQDQISNIK.[Y]	Q14847 [112-121]			1	1174.64										-0.706266		-0.878778		-0.151309	0.888429										-0.0703129					0.73387
157	Q14847	LASP1	[K].TQDQISNIK.[Y]	Q14847 [113-121]			0	1046.55					-2.37638			-2.10891	-2.06594	-1.85359					0.133166		-2.05619																						-3.23692	-2.66301
157	Q14847	LASP1	[R].TGDTGMLPANYVEAI.[-]	Q14847 [247-261]			0	1551.74
157	Q14847	LASP1	[K].QQSELQSQVR.[Y]	Q14847 [76-85]			0	1202.61
158	F5GXR3	PTMS	[K].SVEAAAELSAK.[D]	F5GXR3 [5-15]			0	1075.56	-0.345675					-0.299476	-0.188673			-0.882826		-1.56858								-0.787408	-0.0589226																		-2.20283
159	A0A087X1Z3	PSME2	[K].IIYLNQLLQEDSLNVADLTSLR.[A]	A0A087X1Z3 [40-61]			0	2531.37	0.0247014																																							-0.193814
159	A0A087X1Z3	PSME2	[K].IEDGNDFGVAIQEK.[V]	A0A087X1Z3 [147-160]			0	1534.74																																		0.335935							-0.265736
159	A0A087X1Z3	PSME2	[R].QNLFQEAEEFLYR.[F]	A0A087X1Z3 [22-34]			0	1686.81	-0.0408556																																					-0.203599			-0.121115
159	A0A087X1Z3	PSME2	[K].CILVITWIQHLIPK.[I]	A0A087X1Z3 [133-146]	1xCarbamidomethyl [C1]		0	1734.01
159	A0A087X1Z3	PSME2	[R].ALVHERDEAAYGELR.[A]	A0A087X1Z3 [204-218]			1	1728.87	0.119083						-0.594989
159	A0A087X1Z3	PSME2	[R].AFYAELYHIISSNLEKIVNPK.[G]	A0A087X1Z3 [226-246]			1	2449.31
160	P62081	RPS7	[K].IVKPNGEKPDEFESGISQALLELEMNSDLK.[A]	P62081 [8-37]			0	3330.68	-0.124275
160	P62081	RPS7	[R].TLTAVHDAILEDLVFPSEIVGK.[R]	P62081 [121-142]			0	2367.28	-0.0962859												0.0510175	0.0146853
160	P62081	RPS7	[K].AIIIFVPVPQLK.[S]	P62081 [59-70]			0	1337.86
160	P62081	RPS7	[K].VETFSGVYK.[K]	P62081 [170-178]			0	1029.53
160	P62081	RPS7	[K].DVNFEFPEFQL.[-]	P62081 [184-194]			0	1384.64
160	P62081	RPS7	[K].VETFSGVYKK.[L]	P62081 [170-179]			1	1157.62
161	U3KQK0	HIST1H2BN	[K].AMGIMNSFVNDIFER.[I]	U3KQK0 [59-73]			0	1743.82	-0.143594
161	U3KQK0	HIST1H2BN	[K].AMGIMNSFVNDIFER.[I]	U3KQK0 [59-73]	1xOxidation [M2]		0	1759.81	-0.0794809
162	P46778	RPL21	[R].VYNVTQHAVGIVVNK.[Q]	P46778 [64-78]			0	1640.91
162	P46778	RPL21	[K].HGVVPLATYMR.[I]	P46778 [22-32]			0	1243.66
163	Q53GS9	USP39	[K].EQLIIPQVPLFNILAK.[F]	Q53GS9 [406-421]			0	1836.1
164	P25786	PSMA1	[R].NQYDNDVTVWSPQGR.[I]	P25786 [4-18]			0	1778.81
164	P25786	PSMA1	[K].DLEFTIYDDDDVSPFLEGLEERPQRK.[A]	P25786 [218-243]			1	3126.49
164	P25786	PSMA1	[K].ILHVDNHIGISIAGLTADAR.[L]	P25786 [63-82]			0	2086.14
165	B7Z4C8	RPL31	[K].LYTLVTYVPVTTFK.[INS-]	B7Z4C8 [102-115]			0	1644.92
165	B7Z4C8	RPL31	[R].EYTINIHKR.[I]	B7Z4C8 [24-32]			1	1173.64
166	P29218	IMPA1	[K].EKYPSHSFIGEESVAAGEK.[S]	P29218 [60-78]			1	2064.99																																-0.102518
166	P29218	IMPA1	[K].YPSHSFIGEESVAAGEK.[S]	P29218 [62-78]			0	1807.85
166	P29218	IMPA1	[K].LFCIPVHGIR.[S]	P29218 [182-191]	1xCarbamidomethyl [C3]		0	1211.67	-0.0944369																															-0.117106	-0.0570744								0.036607
166	P29218	IMPA1	[K].SSPVDLVTATDQK.[V]	P29218 [37-49]			0	1360.7
166	P29218	IMPA1	[K].KIEFGVVYSCVEGK.[M]	P29218 [116-129]	1xCarbamidomethyl [C10]		1	1614.82																																0.0342163
167	Q5R3I4	TTC38	[R].DVFNQLLIHAALNCTSSVHK.[N]	Q5R3I4 [416-435]	1xCarbamidomethyl [C14]		0	2267.16																					0.00314557			0.0320622	-0.281926
167	Q5R3I4	TTC38	[R].LQMEGVSVGQR.[W]	Q5R3I4 [302-312]			0	1203.62
167	Q5R3I4	TTC38	[R].IYPFWTPDIPLSSYVK.[G]	Q5R3I4 [168-183]			0	1926																								-0.127797	-0.271307
167	Q5R3I4	TTC38	[R].DVGLPLCQALVEAEDGNPDR.[V]	Q5R3I4 [374-393]	1xCarbamidomethyl [C7]		0	2168.03																						0.127752	0.168316		-0.210286
168	A0A0S2Z4G6; P67936; Q5TCU8; Q5HYB6	TPM1	[R].IQLVEEELDR.[A]	A0A0S2Z4G6 [92-101]; P67936 [56-65]; Q5TCU8 [92-101]; Q5HYB6 [56-65]			0	1243.65
168	A0A0S2Z4G6; P67936; Q5TCU8; Q5HYB6	TPM1	[R].RIQLVEEELDR.[A]	A0A0S2Z4G6 [91-101]; P67936 [55-65]; Q5TCU8 [91-101]; Q5HYB6 [55-65]			1	1399.75	0.047178
168	A0A0S2Z4G6	TPM1	[K].QLEDELVSLQK.[K]	A0A0S2Z4G6 [38-48]			0	1301.69	0.105489																			0.174169	-0.00863714												-0.190768
168	A0A0S2Z4G6; Q5TCU8	TPM1	[K].ATDAEADVASLNR.[R]	A0A0S2Z4G6 [78-90]; Q5TCU8 [78-90]			0	1332.64								0.29504																									0.28582							0.913622
168	A0A0S2Z4G6	TPM1	[R].KLVIIESDLER.[A]	A0A0S2Z4G6 [168-178]			1	1314.76
168	A0A0S2Z4G6; Q5TCU8	TPM1	[K].LDKENALDR.[A]	A0A0S2Z4G6 [13-21]; Q5TCU8 [13-21]			1	1073.56
168	A0A0S2Z4G6; Q5HYB6	TPM1	[K].MELQEIQLK.[E]	A0A0S2Z4G6 [141-149]; Q5HYB6 [89-97]			0	1131.61
168	A0A0S2Z4G6	TPM1	[K].LKGTEDELDK.[Y]	A0A0S2Z4G6 [50-59]			1	1147.58
168	A0A0S2Z4G6	TPM1	[K].EDRYEEEIK.[V]	A0A0S2Z4G6 [218-226]			1	1210.56
169	P23526	AHCY	[K].DGPLNMILDDGGDLTNLIHTK.[Y]	P23526 [122-142]	1xOxidation [M6]		0	2268.12											0.258099	-0.0414343																		-0.353175
169	P23526	AHCY	[K].WLNENAVEK.[V]	P23526 [310-318]			0	1102.55	-0.0651177						0.562057				-0.0818532										0.494379																				-0.132708
169	P23526	AHCY	[K].YPVGVHFLPK.[K]	P23526 [379-388]			0	1156.65
169	P23526	AHCY	[K].LDEAVAEAHLGK.[L]	P23526 [390-401]			0	1252.65																														-0.180877		0.144826			0.0716649
169	P23526	AHCY	[K].VAVVAGYGDVGK.[G]	P23526 [215-226]			0	1134.62
169	P23526	AHCY	[K].QAQYLGMSCDGPFKPDHYR.[Y]	P23526 [413-431]	1xCarbamidomethyl [C9]		0	2270.01								-1.03174			-0.0678213	-0.312956
169	P23526	AHCY	[K].VPAINVNDSVTK.[S]	P23526 [175-186]			0	1256.68											-0.0335957	-0.161355								0.050067	-0.0414575								-0.360892	-0.14695		-0.139868	-0.160139
169	P23526	AHCY	[K].VNIKPQVDR.[Y]	P23526 [319-327]			0	1068.62											-0.0518174	-0.0268493									-0.449767						-0.12604					-0.095383	-0.0587348
169	P23526	AHCY	[K].QAQYLGMSCDGPFKPDHYR.[Y]	P23526 [413-431]	1xCarbamidomethyl [C9]; 1xOxidation [M7]		0	2286.01	0.141572								0.677586		-0.0673056								0.64954						0.447339													1.92849
169	P23526	AHCY	[R].RIILLAEGR.[L]	P23526 [335-343]			1	1040.66											-0.0439666
169	P23526	AHCY	[K].DDAIVCNIGHFDVEIDVK.[W]	P23526 [292-309]	1xCarbamidomethyl [C6]		0	2058.98	0.387913				-0.0477612						-0.0980908	-0.113453																			0.0427634
169	P23526	AHCY	[K].ALDIAENEMPGLMR.[M]	P23526 [21-34]			0	1559.76
169	P23526	AHCY	[K].YPQLLPGIR.[G]	P23526 [143-151]			0	1056.62											-0.0572196	-0.134762								0.018092	0.0473172								0.090479	-0.187747		-0.119886			-0.158962
169	P23526	AHCY	[R].ESLIDGIKR.[TA]	P23526 [197-205]			1	1030.59
169	P23526	AHCY	[K].AGIPVYAWK.[G]	P23526 [95-103]			0	1004.56	-0.00677774										-0.124707
169	P23526	AHCY	[R].GISEETTTGVHNLYK.[M]	P23526 [152-166]			0	1648.82
169	P23526	AHCY	[K].FDNLYGCR.[E]	P23526 [189-196]	1xCarbamidomethyl [C7]		0	1044.46											-0.00383581
169	P23526	AHCY	[K].VADIGLAAWGR.[K]	P23526 [9-19]			0	1128.62											-0.0872365
170	P68036	UBE2L3	[K].TDQVIQSLIALVNDPQPEHPLR.[A]	P68036 [101-122]			0	2483.33																						-0.401663	0.390234			-0.141556	0.216985	-0.130869		-0.355634	0.168909			0.532437	-0.0799381
170	P68036	UBE2L3	[K].GQVCLPVISAENWKPATK.[T]	P68036 [83-100]	1xCarbamidomethyl [C4]		0	1998.05	0.499947																									-0.113687		-0.102941
170	P68036	UBE2L3	[R].IEINFPAEYPFKPPK.[I]	P68036 [53-67]			0	1789.95	-0.207798	0.653483		-0.00415824	-0.976663							1.06535	-0.664001		1.48969				-0.912167			0.454905			-0.108737	-0.130824	-0.0588186	-0.154414			0.0744639	-0.230446		1.03669	0.522424						0.610354
170	P68036	UBE2L3	[K].TDQVIQSLIALVNDPQPEHPLRADLAEEYSK.[D]	P68036 [101-131]			1	3489.79	-0.0682708
170	P68036	UBE2L3	[R].NIQVDEANLLTWQGLIVPDNPPYDK.[G]	P68036 [24-48]			0	2852.45		-0.336823	-0.114427														-0.0994153									-0.258787		-0.232533								-0.542172		-0.566494	-0.193517
170	P68036	UBE2L3	[K].IYHPNIDEK.[G]	P68036 [74-82]			0	1128.57
171	P08133	ANXA6	[K].WGTDEAQFIYILGNR.[S]	P08133 [192-206]			0	1782.88
171	P08133	ANXA6	[R].ILISLATGHREEGGENLDQAR.[E]	P08133 [500-520]			1	2279.17						0.219544
171	P08133	ANXA6	[K].SLEDALSSDTSGHFR.[R]	P08133 [484-498]			0	1621.75	-0.0894935																									-0.627059							-0.0327426
171	P08133	ANXA6	[K].SLHQAIEGDTSGDFLK.[A-]	P08133 [648-663]			0	1717.84
171	P08133	ANXA6	[K].DAYERDLEADIIGDTSGHFQK.[M]	P08133 [136-156]			1	2380.11
171	P08133	ANXA6	[K].GLGTDEDTIIDIITHR.[S]	P08133 [378-393]			0	1768.91	-0.0299644																							0.450321
171	P08133	ANXA6	[R].EDAQVAAEILEIADTPSGDK.[T]	P08133 [521-540]			0	2072
171	P08133	ANXA6	[R].DLEADIIGDTSGHFQK.[M]	P08133 [141-156]			0	1745.83
171	P08133	ANXA6	[K].EAILDIITSR.[S]	P08133 [41-50]			0	1130.64
171	P08133	ANXA6	[K].GTVRPANDFNPDADAK.[A]	P08133 [355-370]			0	1687.8
171	P08133	ANXA6	[K].ALIEILATR.[T]	P08133 [457-465]			0	999.62
171	P08133	ANXA6	[R].IMVSRSELDMLDIREIFR.[T]	P08133 [277-294]	1xOxidation [M2]		2	2239.16
171	P08133	ANXA6	[K].TTGKPIEASIR.[G]	P08133 [221-231]			0	1172.66
171	P08133	ANXA6	[R].LVFDEYLK.[T]	P08133 [213-220]			0	1026.55
171	P08133	ANXA6	[R].ILISLATGHR.[E]	P08133 [500-509]			0	1080.65					-0.559766	-0.587717	-0.0907493	-0.15226
171	P08133	ANXA6	[R].SEIDLLNIR.[R]	P08133 [630-638]			0	1072.6
171	P08133	ANXA6	[K].GFGSDKEAILDIITSR.[S]	P08133 [35-50]			1	1721.91
172	P68371	TUBB4B	[K].FWEVISDEHGIDPTGTYHGDSDLQLER.[I]	P68371 [20-46]			0	3116.42																		-1.14894
173	P05455	SSB	[K].ICHQIEYYFGDFNLPR.[D]	P05455 [17-32]	1xCarbamidomethyl [C2]		0	2071.97	-0.0105932							-0.0596591
173	P05455	SSB	[R].LTTDFNVIVEALSK.[S]	P05455 [61-74]			0	1549.85	-0.526799
173	P05455	SSB	[K].IIEDQQESLNK.[W]	P05455 [318-328]			0	1316.67
173	P05455	SSB	[K].EVTWEVLEGEVEK.[E]	P05455 [300-312]			0	1546.76																				-0.0115651
173	P05455	SSB	[K].GQVLNIQMR.[R]	P05455 [135-143]			0	1058.58
173	P05455	SSB	[R].EDLHILFSNHGEIK.[W]	P05455 [247-260]			0	1651.84	0.0965345												-0.233969						-0.482865
173	P05455	SSB	[K].FSGDLDDQTCR.[E]	P05455 [236-246]	1xCarbamidomethyl [C10]		0	1313.54
173	P05455	SSB	[K].FSGDLDDQTCREDLHILFSNHGEIK.[W]	P05455 [236-260]	1xCarbamidomethyl [C10]		1	2946.37
173	P05455	SSB	[R].SPSKPLPEVTDEYK.[N]	P05455 [92-105]			0	1589.81
173	P05455	SSB	[K].GSIFVVFDSIESAK.[K]	P05455 [152-165]			0	1498.78
173	P05455	SSB	[R].RSPSKPLPEVTDEYK.[N]	P05455 [91-105]			1	1745.91
173	P05455	SSB	[K].KFVETPGQK.[Y]	P05455 [166-174]			1	1033.57								0.305113
174	Q9Y2V2	CARHSP1	[K].GHGFITPADGGPDIFLHISDVEGEYVPVEGDEVTYK.[M]	Q9Y2V2 [75-110]			0	3859.83	-0.032742																			-0.188914	-0.182792	0.000944268	0.0363211	-0.493722	-0.0844086	-0.231568	-0.944953	-0.283836	-0.703816	-0.202432	-0.228931										-1.11718
174	Q9Y2V2	CARHSP1	[K].LQAVEVVITHLAPGTK.[H]	Q9Y2V2 [121-136]			0	1675.97	-0.00335377													-0.0523956	0.428123					-0.0746004	-0.136682	0.0389077	0.131808	0.0210846	0.0387601	-0.1954	-0.259425	-0.228428	-0.11519	-0.0939357	-0.277189	-0.0890691	-0.0992328		-0.146961	-0.304801	-0.287535	-0.468193	-0.330961	-0.267217	-0.183383
175	P04080	CSTB	[R].VFQSLPHENKPLTLSNYQTNK.[A]	P04080 [69-89]			0	2458.27												-0.251803		-0.0966428	-0.0776784	-0.0735168		-0.0525723		-0.558728	-0.17161	-0.131292	-0.607213		0.0770888	-0.153172	-0.257952	-0.17568	0.433782	0.256969	-0.145229	0.0749701
175	P04080	CSTB	[K].SQVVAGTNYFIK.[V]	P04080 [45-56]			0	1326.71												-0.177139		-0.122089	-0.0484709	-0.580621		-0.148375		-0.0560436	-0.174885	-0.0779254	-0.168968		-0.194741		-0.0795176		-0.124946	-0.0923018	-0.14356				-0.21046
175	P04080	CSTB	[K].VHVGDEDFVHLR.[V]	P04080 [57-68]			0	1422.71												-0.136221		-0.0210141	0.0185456	-0.114753		-0.321642		-0.458744	-0.0840777	-0.0750432	-0.171233					-0.113396
175	P04080	CSTB	[-].MMCGAPSATQPATAETQHIADQVR.[S]	P04080 [1-24]	1xAcetyl [N-Term]; 1xCarbamidomethyl [C3]; 1xOxidation [M2]	P04080 1xAcetyl [N-Term]	0	2629.18
176	P62913	RPL11	[R].KNNFSDTGNFGFGIQEHIDLGIK.[Y]	P62913 [96-118]			1	2551.26
176	P62913	RPL11	[K].VLEQLTGQTPVFSK.[A]	P62913 [39-52]			0	1546.85	0.0139216							-0.358796
176	P62913	RPL11	[K].LCLNICVGESGDR.[L]	P62913 [20-32]	2xCarbamidomethyl [C2; C6]		0	1492.69																									0.624246
177	H7BY58	PCMT1	[R].MGYAEEAPYDAIHVGAAAPVVPQALIDQLKPGGR.[L]	H7BY58 [203-236]			0	3504.79	-0.2627
177	H7BY58	PCMT1	[K].SGGASHSELIHNLR.[KS]	H7BY58 [63-76]			0	1477.75																														-0.334813						-1.77235
178	A0A0B4J1R4	HPD	[R].FWSVDDTQVHTEYSSLR.[S]	A0A0B4J1R4 [209-225]			0	2069.96
178	A0A0B4J1R4	HPD	[K].FAVLQTYGDTTHTLVEK.[M]	A0A0B4J1R4 [133-149]			0	1922.99
178	A0A0B4J1R4	HPD	[K].TEDIITAIR.[H]	A0A0B4J1R4 [271-279]			0	1031.57
178	A0A0B4J1R4	HPD	[R].SIVVANYEESIK.[M]	A0A0B4J1R4 [226-237]			0	1351.71
178	A0A0B4J1R4	HPD	[K].VKENIDALEELK.[I]	A0A0B4J1R4 [310-321]			1	1400.76																				0.291851																-0.129656
179	P62979	RPS27A	[K].IQDKEGIPPDQQR.[L]	P62979 [30-42]			1	1523.78				0.948648												-0.288201	-0.226616	0.554258										-1.21722			-0.839147					-0.293128			1.06261		0.111981
179	P62979	RPS27A	[R].TLSDYNIQKESTLHLVLR.[L]	P62979 [55-72]			1	2130.16																-0.136074
179	P62979	RPS27A	[K].TITLEVEPSDTIENVKAK.[I]	P62979 [12-29]			1	1987.06															-0.193793	-0.11813	-0.232714
179	P62979	RPS27A	[K].TITLEVEPSDTIENVK.[A]	P62979 [12-27]			0	1787.93	0.0274141															-2.33928				0.783213			-0.481007	0.198777	0.0519232									-0.172961
179	P62979	RPS27A	[K].QLEDGRTLSDYNIQKESTLHLVLR.[L]	P62979 [49-72]			2	2828.49
179	P62979	RPS27A	[K].EGIPPDQQRLIFAGK.[Q]	P62979 [34-48]			1	1668.91																-0.28452
179	P62979	RPS27A	[K].ESTLHLVLR.[L]	P62979 [64-72]			0	1067.62								-0.0357882						-0.652176	-0.131728	-0.0794872	-0.0965235	-0.231265	-0.193247	-0.397689					-1.34648
180	P09012	SNRPA	[R].HDIAFVEFDNEVQAGAAR.[D]	P09012 [244-261]			0	1988.95					-0.124326																				-0.0805338
181	P07741	APRT	[R].GFLFGPSLAQELGLGCVLIR.[K]	P07741 [68-87]	1xCarbamidomethyl [C16]		0	2147.17								-0.0771175																		-0.118518		-0.109845
181	P07741	APRT	[R].IDYIAGLDSR.[G]	P07741 [58-67]			0	1122.58
181	P07741	APRT	[R].DISPVLKDPASFR.[A]	P07741 [28-40]			1	1444.78	0.254976																				-0.282891	-0.13649	-0.185746	-0.14424	-0.175595		-0.244654	-0.144008
181	P07741	APRT	[R].SFPDFPTPGVVFR.[D]	P07741 [15-27]			0	1465.75																						-0.232203	-0.0520985	-0.218648	-0.086518	-0.18178	-0.214493	-0.118243
181	P07741	APRT	[K].DALEPGQRVVVVDDLLATGGTMNAACELLGR.[L]	P07741 [115-145]	1xCarbamidomethyl [C26]		1	3240.64
182	P52758	HRSP12; RIDA	[K].TTVLLADINDFNTVNEIYK.[Q]	P52758 [79-97]			0	2183.12																				-0.030061
182	P52758	HRSP12; RIDA	[R].AAYQVAALPK.[G]	P52758 [108-117]			0	1031.59
182	P52758	HRSP12; RIDA	[K].AAGCDFTNVVK.[T]	P52758 [68-78]	1xCarbamidomethyl [C4]		0	1181.56
182	P52758	HRSP12; RIDA	[K].APGAIGPYSQAVLVDR.[T]	P52758 [14-29]			0	1613.86	0.775221								-0.873877									0.0202169		-0.0678329													-0.124244		0.271066
183	Q06520	SULT2A1	[R].SPWVESEIGYTALSETESPR.[L]	Q06520 [75-94]			0	2238.06	-0.100848	-0.323165									0.227232														-1.4625					0.430332			-0.50132								-0.0430952
183	Q06520	SULT2A1	[K].NHFTVAQAEDFDK.[L]	Q06520 [256-268]			0	1521.7																																							-0.222901
183	Q06520	SULT2A1	[K].NHFTVAQAEDFDKLFQEK.[M]	Q06520 [256-273]			1	2167.05
184	Q04760	GLO1	[K].GLAFIQDPDGYWIEILNPNK.[M]	Q04760 [160-179]			0	2303.17	-0.145008
184	Q04760	GLO1	[K].DFLLQQTMLR.[V]	Q04760 [29-38]			0	1264.67																													-0.102543			-0.0525711			0.0224514
184	Q04760	GLO1	[K].FSLYFLAYEDKNDIPK.[E]	Q04760 [68-83]			1	1962.98																													-0.234669					-0.0461839
184	Q04760	GLO1	[K].FSLYFLAYEDK.[N]	Q04760 [68-78]			0	1395.68																													-0.021752
184	Q04760	GLO1	[R].GFGHIGIAVPDVYSACK.[R]	Q04760 [124-140]	1xCarbamidomethyl [C16]		0	1790.89																				0.727866									-0.163914			-0.204966		-0.154972	-0.141839	-0.245529	0.116466	0.0426925	-0.695587	0.0232931
184	Q04760	GLO1	[K].DFLLQQTMLR.[V]	Q04760 [29-38]	1xOxidation [M8]		0	1280.67																									-0.374138				-0.0272768			-0.0739378			0.0189278
184	Q04760	GLO1	[R].VLGMTLIQK.[C]	Q04760 [52-60]			0	1002.6	-0.0450911																												-0.0541449			-0.108463
184	Q04760	GLO1	[R].VLGMTLIQK.[C]	Q04760 [52-60]	1xOxidation [M4]		0	1018.6																													-0.0514161			0.315084				0.652453		0.336906
185	Q15843	NEDD8	[K].ILGGSVLHLVLALR.[G]	Q15843 [61-74]			0	1460.93																						-0.317573	-0.208215	-0.246616	-0.379555
186	P28799	GRN	[R].CPDGSTCCELPSGK.[Y]	P28799 [215-228]	3xCarbamidomethyl [C1; C7; C8]		0	1567.62																			-0.0480955	-0.159192		-0.0738308	-0.117443	-0.117181	-0.235545
186	P28799	GRN	[R].QHCCPAGYTCNVK.[A]	P28799 [479-491]	3xCarbamidomethyl [C3; C4; C10]		0	1594.66
187	Q8N392	ARHGAP18	[K].KGEVFLYEIGGNIGER.[C]	Q8N392 [621-636]			1	1780.92	-0.879249																		0.3678							-0.172658		-0.165732
187	Q8N392	ARHGAP18	[R].FLSQESGVAQTLK.[K]	Q8N392 [608-620]			0	1407.75																									-0.711888	-0.0518547			0.316212
187	Q8N392	ARHGAP18	[K].DLYQLNPNAEWVIK.[S]	Q8N392 [646-659]			0	1702.88
188	H7BZ14	PPIL3	[K].KFEDEYSEYLK.[H-]	H7BZ14 [89-99]			1	1450.67																		0.0258137		-0.0746794	-0.112327				-0.995954
189	Q9UEE9	CFDP1	[K].EKPQANVPSALPSLPAGSGLK.[R]	Q9UEE9 [199-219]			0	2061.13																	-0.102017				-0.232782				-0.387498
190	O95865	DDAH2	[R].DFAVSTVPVSGPSHLR.[G]	O95865 [158-173]			0	1668.87																								-0.125108	-0.19089
190	O95865	DDAH2	[K].AGAGLSSLCLVLSTRPHS.[-]	O95865 [268-285]	1xCarbamidomethyl [C9]		0	1825.96																					-0.163676	-0.0293462		-0.227612	-0.257759
191	K7ELC2	RPS15	[K].TFNQVEIKPEMIGHYLGEFSITYKPVK.[H]	K7ELC2 [108-134]			0	3168.64																		-0.387929																							-0.119752
191	K7ELC2	RPS15	[K].KEAPPMEKPEVVK.[T]	K7ELC2 [72-84]			1	1481.8
191	K7ELC2	RPS15	[K].KEAPPMEKPEVVK.[T]	K7ELC2 [72-84]	1xOxidation [M6]		1	1497.8																																		0.425514
191	K7ELC2	RPS15	[R].GVDLDQLLDMSYEQLMQLYSAR.[Q]	K7ELC2 [26-47]			0	2588.24	-0.0845182
192	P28066	PSMA5	[R].LFQVEYAIEAIK.[L]	P28066 [21-32]			0	1423.78																									0.344043
192	P28066	PSMA5	[R].ITSPLMEPSSIEK.[I]	P28066 [54-66]			0	1431.74
193	P62495	ETF1	[K].FGFIVIDGSGALFGTLQGNTR.[E]	P62495 [146-166]			0	2170.13
193	P62495	ETF1	[K].KVNIDFEPFKPINTSLYLCDNK.[F]	P62495 [109-130]	1xCarbamidomethyl [C19]		1	2655.35
193	P62495	ETF1	[K].VPPNGLVVYCGTIVTEEGK.[E]	P62495 [88-106]	1xCarbamidomethyl [C10]		0	2032.04																					-1.60728
193	P62495	ETF1	[K].VAETAVQLFISGDK.[V]	P62495 [205-218]			0	1477.79
193	P62495	ETF1	[K].VPPNGLVVYCGTIVTEEGKEK.[K]	P62495 [88-108]	1xCarbamidomethyl [C10]		1	2289.18
193	P62495	ETF1	[K].LVDISYGGENGFNQAIELSTEVLSNVK.[F]	P62495 [253-279]			0	2896.46		-0.115071														-0.0406956			0.609072	1.06966								-0.140367			-0.271107			0.868757		-0.0599529
193	P62495	ETF1	[R].LSVLGAITSVQQR.[L]	P62495 [69-81]			0	1371.8
193	P62495	ETF1	[R].YVLHCQGTEEEK.[I]	P62495 [331-342]	1xCarbamidomethyl [C5]		0	1492.67																																								0.838942
193	P62495	ETF1	[K].ILYLTPEQEKDK.[S]	P62495 [343-354]			1	1476.79
193	P62495	ETF1	[R].YFDEISQDTGK.[Y]	P62495 [290-300]			0	1302.58																																								-0.179335
193	P62495	ETF1	[K].TELSQSDMFDQR.[L]	P62495 [234-245]			0	1456.64
193	P62495	ETF1	[K].VNVAGLVLAGSADFK.[T]	P62495 [219-233]			0	1460.81
193	P62495	ETF1	[K].VNIDFEPFKPINTSLYLCDNK.[F]	P62495 [110-130]	1xCarbamidomethyl [C18]		0	2527.25
193	P62495	ETF1	[K].FHTEALTALLSDDSK.[F]	P62495 [131-145]			0	1647.82
193	P62495	ETF1	[K].FGATLEIVTDK.[S]	P62495 [385-395]			0	1193.64
193	P62495	ETF1	[K].YCFGVEDTLK.[A]	P62495 [301-310]	1xCarbamidomethyl [C2]		0	1231.57
193	P62495	ETF1	[K].TELSQSDMFDQR.[L]	P62495 [234-245]	1xOxidation [M8]		0	1472.63
193	P62495	ETF1	[K].SQEGSQFVK.[G]	P62495 [396-404]			0	1009.49
193	P62495	ETF1	[K].ILYLTPEQEK.[D]	P62495 [343-352]			0	1233.67
194	Q9NRV9	HEBP1	[K].FATVEVTDKPVDEALR.[E]	Q9NRV9 [41-56]			0	1789.93	0.431224																				-0.0299579	-0.145464	-0.13335	-0.210635				0.699799							0.327719
194	Q9NRV9	HEBP1	[R].RNEIWLLK.[T]	Q9NRV9 [181-188]			1	1071.63
195	P10768	ESD	[K].SYPGSQLDILIDQGK.[D]	P10768 [210-224]			0	1633.84												-0.0654982		0.0285044		-0.164167	-0.136352	-0.148727		-0.144783			0.0938007							-0.147503
195	P10768	ESD	[K].SYPGSQLDILIDQGKDDQFLLDGQLLPDNFIAACTEK.[K]	P10768 [210-246]	1xCarbamidomethyl [C34]		1	4138.03	-0.018662
195	P10768	ESD	[K].VFEHDSVELNCK.[M]	P10768 [18-29]	1xCarbamidomethyl [C11]		0	1476.68														0.40649	-0.145238					-0.166658
195	P10768	ESD	[K].SGYHQSASEHGLVVIAPDTSPR.[G]	P10768 [65-86]			0	2308.13	0.0470549	-0.487178								0.515715					-0.141566	-0.331252			-0.217516	-0.655099				-0.921862		-0.649908					-0.920545			-0.461805			0.275455			0.442259
195	P10768	ESD	[R].MSIFGHSMGGHGALICALK.[N]	P10768 [143-161]	1xCarbamidomethyl [C16]; 2xOxidation [M1; M8]		0	2018.96	-0.0231924														-0.120251
195	P10768	ESD	[K].DDQFLLDGQLLPDNFIAACTEK.[K]	P10768 [225-246]	1xCarbamidomethyl [C19]		0	2523.21															-0.128872	-0.194394	-0.280439	-0.202538		-0.148269
195	P10768	ESD	[K].AYDATHLVK.[S]	P10768 [201-209]			0	1017.54							-0.293202					-0.0310624			-0.0923418	-0.0858968		0.000904773	-0.138973	0.0144399
195	P10768	ESD	[K].KAFSGYLGTDQSK.[W]	P10768 [186-198]			1	1401.7
195	P10768	ESD	[K].CPALYWLSGLTCTEQNFISK.[S]	P10768 [45-64]	2xCarbamidomethyl [C1; C12]		0	2388.14															-0.105104
195	P10768	ESD	[K].GEDESWDFGTGAGFYVDATEDPWK.[T]	P10768 [92-115]			0	2679.12															-0.191906
195	P10768	ESD	[R].MYSYVTEELPQLINANFPVDPQR.[M]	P10768 [120-142]	1xOxidation [M1]		0	2740.33		-0.108045				-0.167499					-0.0255599				-0.173557								0.0897484		-0.661088				-0.108076	0.266426
196	P09382	LGALS1	[R].FNAHGDANTIVCNSK.[D]	P09382 [50-64]	1xCarbamidomethyl [C12]		0	1647.75								-1.03129										0.0811995	-0.758144	-0.105422	-0.0364365				0.109427
196	P09382	LGALS1	[K].DSNNLCLHFNPR.[F]	P09382 [38-49]	1xCarbamidomethyl [C6]		0	1486.69																		0.12841	-0.0176362	0.0520256	-0.0141025	-0.0185454			1.60289	0.00437568
196	P09382	LGALS1	[R].VRGEVAPDAK.[S]	P09382 [20-29]			1	1041.57																		-0.225366	0.0342099	-0.0332553	-0.060623	-0.0144915				-0.0392464			-0.505751				-0.242933
197	Q16658	FSCN1	[R].YLAADKDGNVTCER.[E]	Q16658 [69-82]	1xCarbamidomethyl [C12]		1	1611.74																																			-0.171807	1.33362
197	Q16658	FSCN1	[R].SSYDVFQLEFNDGAYNIK.[D]	Q16658 [409-426]			0	2109.98
197	Q16658	FSCN1	[K].QIWTLEQPPDEAGSAAVCLR.[S]	Q16658 [44-63]	1xCarbamidomethyl [C18]		0	2241.1																						0.614119										-0.173308			-0.297378
197	Q16658	FSCN1	[K].DELFALEQSCAQVVLQAANER.[N]	Q16658 [251-271]	1xCarbamidomethyl [C10]		0	2391.16
197	Q16658	FSCN1	[R].DVPWGVDSLITLAFQDQR.[Y]	Q16658 [168-185]			0	2060.04							0.149053												0.310348											0.414765									0.467518
197	Q16658	FSCN1	[R].LVARPEPATGYTLEFR.[S]	Q16658 [202-217]			0	1819.97																						-0.0604156			-0.0894159
197	Q16658	FSCN1	[R].WSLQSEAHR.[R]	Q16658 [101-109]			0	1113.54
197	Q16658	FSCN1	[K].LINRPIIVFR.[G]	Q16658 [380-389]			0	1240.79
197	Q16658	FSCN1	[K].NASCYFDIEWR.[D]	Q16658 [331-341]	1xCarbamidomethyl [C4]		0	1460.63
197	Q16658	FSCN1	[R].FLIVAHDDGR.[W]	Q16658 [91-100]			0	1142.6										-0.593731					-0.634423				0.0877223	-0.171255				-0.290499											-0.971159
198	O75533	SF3B1	[R].SLVEIIEHGLVDEQQK.[V]	O75533 [685-700]			0	1836.97																																									0.1315
198	O75533	SF3B1	[K].IYNSIYIGSQDALIAHYPR.[I]	O75533 [1268-1286]			0	2194.13
198	O75533	SF3B1	[K].LLVDVDESTLSPEEQK.[E]	O75533 [478-493]			0	1801.91
198	O75533	SF3B1	[K].IMGNLGAADIDHK.[L]	O75533 [875-887]			0	1354.68
198	O75533	SF3B1	[K].SVNDQPSGNLPFLKPDDIQYFDK.[L]	O75533 [455-477]			0	2637.28
198	O75533	SF3B1	[R].VPELNVQNGVLK.[S]	O75533 [1138-1149]			0	1309.75
198	O75533	SF3B1	[R].QLVDTTVELANK.[V]	O75533 [832-843]			0	1330.72																							-0.17609		0.156908	0.838416			0.0296709		-0.257124	0.198311						0.765124
198	O75533	SF3B1	[R].GDTPGHATPGHGGATSSAR.[K]	O75533 [271-289]			0	1733.8
198	O75533	SF3B1	[R].DTPGHGSGWAETPR.[T]	O75533 [302-315]			0	1467.66
198	O75533	SF3B1	[R].AFAVVASALGIPSLLPFLK.[A]	O75533 [631-649]			0	1914.15		0.0181032
198	O75533	SF3B1	[K].KPGYHAPVALLNDIPQSTEQYDPFAEHRPPK.[I]	O75533 [81-111]			0	3515.77			-0.213593																																						-0.461234
198	O75533	SF3B1	[K].VQENCIDLVGR.[I]	O75533 [1031-1041]	1xCarbamidomethyl [C5]		0	1302.65																									2.00932
198	O75533	SF3B1	[K].THEDIEAQIR.[E]	O75533 [7-16]			0	1211.6																							-0.582967	-2.26838													0.779369
198	O75533	SF3B1	[R].ATVNTFGYIAK.[A]	O75533 [1076-1086]			0	1184.63
198	O75533	SF3B1	[K].IWDPTPSHTPAGAATPGR.[G]	O75533 [253-270]			0	1831.91
198	O75533	SF3B1	[K].LDDLVRPYVHK.[I]	O75533 [563-573]			0	1354.75
198	O75533	SF3B1	[K].AREFGAGPLFNQILPLLMSPTLEDQER.[H]	O75533 [523-549]			1	3042.57
199	B0QZ18	CPNE1	[K].SDPLCVLLQDVGGGSWAELGR.[T]	B0QZ18 [31-51]	1xCarbamidomethyl [C5]		0	2229.1	-0.212502																												-0.132244			-0.14245	-0.192553	-0.2111	-0.139287	0.0259216
199	B0QZ18	CPNE1	[R].EALAQTVLAEVPTQLVSYFR.[A]	B0QZ18 [500-519]			0	2235.2			-0.161092																										-0.0700453			-0.165241	-0.226989		-0.1401	-0.979541					-0.233364
199	B0QZ18	CPNE1	[R].DDDFLGGAECSLGQIVSSQVLTLPLMLKPGKPAGR.[G]	B0QZ18 [95-129]	1xCarbamidomethyl [C10]		0	3669.9					0.357547											0.205301			1.0409										-0.501221			-0.234862	-0.117223		-0.273323
199	B0QZ18	CPNE1	[R].VRNCSSPEFSK.[T]	B0QZ18 [55-65]	1xCarbamidomethyl [C4]		1	1310.62
199	B0QZ18	CPNE1	[R].LYGPTNFAPIINHVAR.[F]	B0QZ18 [390-405]			0	1782.96																							-1.29132						-0.0771647	-0.82537		-0.110162	-0.12776		-0.0657985			0.605835
199	B0QZ18	CPNE1	[R].DDDFLGGAECSLGQIVSSQVLTLPLMLKPGKPAGR.[G]	B0QZ18 [95-129]	1xCarbamidomethyl [C10]; 1xOxidation [M26]		0	3685.89
199	B0QZ18	CPNE1	[R].FGIYDIDNKTPELR.[D]	B0QZ18 [81-94]			1	1680.86																													-0.612168			0.72649
199	B0QZ18	CPNE1	[R].FAAQAAHQGTASQYFMLLLLTDGAVTDVEATR.[E]	B0QZ18 [406-437]			0	3396.69
199	B0QZ18	CPNE1	[R].AQGWAPLKPLPPSAK.[D]	B0QZ18 [520-534]			0	1560.89																													-0.0914718			-0.0948977	-0.0877956		-0.155843
199	B0QZ18	CPNE1	[K].SDPFLEFFR.[Q]	B0QZ18 [163-171]			0	1157.56																													-0.230257			-0.16452	-0.114645		-0.0897796
200	P07954	FH	[K].ETAIELGYLTAEQFDEWVKPK.[D]	P07954 [484-504]			0	2467.24	-0.0157912									0.254568																								-0.259732				0.0307765	8.23119e-05	-0.0984608
200	P07954	FH	[R].THTQDAVPLTLGQEFSGYVQQVK.[Y]	P07954 [234-256]			0	2546.29	-0.0425519			-1.18684																				-1.96488
200	P07954	FH	[R].IYELAAGGTAVGTGLNTR.[I]	P07954 [269-286]			0	1763.93																																		-0.475543		-0.285744		-0.214562		-0.0617079
201	X6R5Z6	COA6	[K].FEAGQFEPSETTAK.[S]	X6R5Z6 [141-154]			0	1541.71							-0.646201					-0.842851									-1.07			-2.05921			0.00551116	-0.0780021	-0.121332	-0.258184	-0.601607
202	P49773	HINT1	[K].AQVARPGGDTIFGK.[I]	P49773 [8-21]			0	1416.76																								-1.62889									-0.0936478		-0.0963967
203	P34949	MPI	[K].VLSVETPLSIQAHPNK.[E]	P34949 [100-115]			0	1732.96																					-0.0527354			-0.165938
203	P34949	MPI	[K].DTFNGNLPFLFK.[V]	P34949 [88-99]			0	1412.72																								-0.0892972
204	P52895; Q04828	AKR1C2	[K].NLQLDYVDLYLIHFPVSVKPGEEVIPK.[D]	P52895 [105-131]; Q04828 [105-131]			0	3125.69	-0.0171476												-0.113368											-0.305941
204	P52895; Q04828	AKR1C2	[K].LNDGHFMPVLGFGTYAPAEVPK.[S]	P52895 [10-31]; Q04828 [10-31]	1xOxidation [M7]		0	2376.17										0.793514	0.557658	-0.00100927	0.0771437		-0.417112						-0.265	0.721183					0.805181				0.977589		1.18802		0.645138						-0.963083
204	P52895; Q04828	AKR1C2	[K].LNDGHFMPVLGFGTYAPAEVPK.[S]	P52895 [10-31]; Q04828 [10-31]			0	2360.17	-5.24329e-05																								0.183236					-0.682808						0.0477464
204	P52895; Q04828	AKR1C2	[K].YKPVCNQVECHPYFNQR.[K-]	P52895 [184-200]; Q04828 [184-200]	2xCarbamidomethyl [C5; C10]		0	2239.02	0.1466						-0.348432		-0.0214304	-0.315733		-0.169426												-0.0591079
204	P52895; Q04828	AKR1C2	[K].NLQLDYVDLYLIHFPVSVKPGEEVIPKDENGK.[I]	P52895 [105-136]; Q04828 [105-136]			1	3668.92	-0.0364846
204	P52895; Q04828	AKR1C2	[R].QNVQVFEFQLTSEEMK.[A]	P52895 [279-294]; Q04828 [279-294]			0	1956.94	0.170771
204	P52895; Q04828	AKR1C2	[R].EEPWVDPNSPVLLEDPVLCALAK.[K]	P52895 [224-246]; Q04828 [224-246]	1xCarbamidomethyl [C19]		0	2591.31	-0.033443
204	P52895; Q04828	AKR1C2	[K].DIVLVAYSALGSHR.[E]	P52895 [210-223]; Q04828 [210-223]			0	1500.82										-0.994592																				-0.163368
204	P52895; Q04828	AKR1C2	[K].SKDIVLVAYSALGSHR.[E]	P52895 [208-223]; Q04828 [208-223]			1	1715.94	0.239355
204	P52895	AKR1C2	[R].LLEMILNKPGLK.[Y]	P52895 [172-183]			0	1368.83																								-0.256338
204	P52895; Q04828	AKR1C2	[K].SKDIVLVAYSALGSHREEPWVDPNSPVLLEDPVLCALAK.[K]	P52895 [208-246]; Q04828 [208-246]	1xCarbamidomethyl [C35]		2	4288.23	-0.00178249
204	P52895; Q04828	AKR1C2	[R].YLTLDIFAGPPNYPFSDEY.[-]	P52895 [305-323]; Q04828 [305-323]			0	2222.03
205	C9JDL1	KHK	[R].YTVFQTTGSVPIATVIINEASGSR.[T]	C9JDL1 [85-108]			0	2511.31						-0.14897							-0.0701406									0.0581661	-0.113432	-0.47256
206	E9PF18	HADH	[K].TLSTIATSTDAASVVHSTDLVVEAIVENLK.[V]	E9PF18 [155-184]			0	3084.63	-0.356674										-0.258896						-0.178205							-0.543169
206	E9PF18	HADH	[K].LGAGYPMGPFELLDYVGLDTTK.[F]	E9PF18 [326-347]			0	2357.17		0.291144																																0.708073
206	E9PF18	HADH	[K].FAAEHTIFASNTSSLQITSIANATTR.[Q]	E9PF18 [196-221]			0	2752.39															0.0247438
206	E9PF18	HADH	[K].KGIEESLRK.[V]	E9PF18 [127-135]			2	1059.62
207	P49327	FASN	[R].LHLSGIDANPNALFPPVEFPAPR.[G]	P49327 [803-825]			0	2472.3	-0.0186283
207	P49327	FASN	[K].LPEDPLLSGLLDSPALK.[A]	P49327 [1209-1225]			0	1777.99	-0.0768912
207	P49327	FASN	[K].LPESENLQEFWDNLIGGVDMVTDDDRR.[W]	P49327 [13-39]			1	3163.46	0.000922451
207	P49327	FASN	[R].LFDHPESPTPNPTEPLFLAQAEVYK.[E]	P49327 [968-992]			0	2840.41	-0.0594706
207	P49327	FASN	[R].SLYQSAGVAPESFEYIEAHGTGTK.[V]	P49327 [275-298]			0	2542.21	-0.0602448																	0.129503																				-0.185683
207	P49327	FASN	[K].TGGAYGEDLGADYNLSQVCDGK.[V]	P49327 [2450-2471]	1xCarbamidomethyl [C19]		0	2289.99	-0.0429422
207	P49327	FASN	[R].RPTPQDSPIFLPVDDTSFR.[W]	P49327 [1405-1423]			0	2188.1	-0.0540316									0.412984																									-0.345261
207	P49327	FASN	[R].CVLLSNLSSTSHVPEVDPGSAELQK.[V]	P49327 [1471-1495]	1xCarbamidomethyl [C1]		0	2667.33	0.0251087
207	P49327	FASN	[R].DLVEAVAHILGIR.[D]	P49327 [2126-2138]			0	1405.82	-0.0203376
207	P49327	FASN	[R].ALGLGVEQLPVVFEDVVLHQATILPK.[T]	P49327 [902-927]			0	2785.59	-0.0325754
207	P49327	FASN	[R].HFLLEEDKPEEPTAHAFVSTLTR.[G]	P49327 [1516-1538]			0	2667.34	-0.000236704
207	P49327	FASN	[R].AAPLDSIHSLAAYYIDCIR.[Q]	P49327 [2276-2294]	1xCarbamidomethyl [C17]		0	2149.07
207	P49327	FASN	[R].WLSTSIPEAQWHSSLAR.[T]	P49327 [712-728]			0	1968.99
207	P49327	FASN	[K].DTVTISGPQAPVFEFVEQLR.[K]	P49327 [647-666]			0	2233.15	0.0892795
207	P49327	FASN	[K].LTPGCEAEAETEAICFFVQQFTDMEHNR.[V]	P49327 [2355-2382]	2xCarbamidomethyl [C5; C15]		0	3330.45	-0.0501647
208	Q15233	NONO	[R].FGQAATMEGIGAIGGTPPAFNR.[A]	Q15233 [435-456]	1xOxidation [M7]		0	2179.06					-0.380379	-0.221594					-0.125009
208	Q15233	NONO	[R].NLPQYVSNELLEEAFSVFGQVER.[A]	Q15233 [154-176]			0	2668.33	0.310173	0.109017			-0.0132493
208	Q15233	NONO	[R].FACHSASLTVR.[N]	Q15233 [143-153]	1xCarbamidomethyl [C3]		0	1248.62						-0.992617		-0.721595
208	Q15233	NONO	[R].CSEGSFLLTTFPRPVTVEPMDQLDDEEGLPEK.[L]	Q15233 [208-239]	1xCarbamidomethyl [C1]		0	3636.71
208	Q15233	NONO	[R].RMEELHNQEVQK.[R]	Q15233 [325-336]			1	1540.75
208	Q15233	NONO	[R].AAPGAEFAPNKR.[R]	Q15233 [457-468]			1	1228.64
208	Q15233	NONO	[R].FGQAATMEGIGAIGGTPPAFNR.[A]	Q15233 [435-456]			0	2163.07					0.749938	-0.0776953																																		0.558536
209	P24752	ACAT1	[R].IVAFADAAVEPIDFPIAPVYAASMVLK.[D]	P24752 [312-338]	1xOxidation [M24]		0	2834.5
209	P24752	ACAT1	[K].LGSIAIQGAIEK.[A]	P24752 [67-78]			0	1199.7
209	P24752	ACAT1	[R].TPIGSFLGSLSLLPATK.[L]	P24752 [50-66]			0	1701.98	-0.0799251
209	P24752	ACAT1	[R].NEQDAYAINSYTR.[S]	P24752 [209-221]			0	1544.7	-0.148525
209	P24752	ACAT1	[R].QAVLGAGLPISTPCTTINK.[V]	P24752 [106-124]	1xCarbamidomethyl [C14]		0	1941.05																		0.212414													0.526897
209	P24752	ACAT1	[K].GQPDVVVKEDEEYKR.[V]	P24752 [244-258]			2	1790.89
209	P24752	ACAT1	[K].EAYMGNVLQGGEGQAPTR.[Q]	P24752 [88-105]			0	1877.88
209	P24752	ACAT1	[K].FGNEVIPVTVTVK.[G]	P24752 [231-243]			0	1402.79	-0.304227
209	P24752	ACAT1	[R].IVAFADAAVEPIDFPIAPVYAASMVLK.[D]	P24752 [312-338]			0	2818.51																	-0.177794
209	P24752	ACAT1	[K].RLNVTPLAR.[I]	P24752 [303-311]			1	1039.64											0.139879													-0.050636
209	P24752	ACAT1	[R].IVGHLTHALK.[Q]	P24752 [394-403]			0	1088.66
210	A0A0A0MT83	IVD	[K].FLQEHLAPK.[A]	A0A0A0MT83 [59-67]			0	1082.6
210	A0A0A0MT83	IVD	[K].QLGNLGVLGITAPVQYGGSGLGYLEHVLVMEEISR.[A]	A0A0A0MT83 [86-120]			0	3669.93
210	A0A0A0MT83	IVD	[K].QLGNLGVLGITAPVQYGGSGLGYLEHVLVMEEISR.[A]	A0A0A0MT83 [86-120]	1xOxidation [M30]		0	3685.93
211	A0A024R4E5	HDLBP	[K].APDMSSSEEFPSFGAQVAPK.[T]	A0A024R4E5 [1241-1260]	1xOxidation [M4]		0	2097.94								-0.0655427	-0.136857	-0.150842	-0.0709254
212	Q9BSH5	HDHD3	[R].AHGLEVEPSALEQGFR.[Q]	Q9BSH5 [35-50]			0	1739.87																				-0.0704402	-0.132864			-0.30674						-0.161173							0.167384			0.336201
212	Q9BSH5	HDHD3	[K].DFSHPCTWQVLDGAEDTLR.[E]	Q9BSH5 [104-122]	1xCarbamidomethyl [C6]		0	2247.01																					-0.0838979
213	H3BPE7	FUS	[K].GEATVSFDDPPSAK.[A]	H3BPE7 [336-349]			0	1420.66
213	H3BPE7	FUS	[K].AAIDWFDGKEFSGNPIK.[V]	H3BPE7 [350-366]			1	1894.93	-0.0454955				-0.0710379												0.621852
214	P14618	PKM	[K].FGVEQDVDMVFASFIR.[K]	P14618 [231-246]			0	1859.9
214	P14618	PKM	[R].EAEAAIYHLQLFEELR.[R]	P14618 [384-399]			0	1931.99																											0.271857	-1.49906
214	P14618	PKM	[K].KGVNLPGAAVDLPAVSEK.[D]	P14618 [207-224]			1	1764.99	-0.0669239
214	P14618	PKM	[K].KGVNLPGAAVDLPAVSEKDIQDLK.[F]	P14618 [207-230]			2	2477.36	-0.0592654
214	P14618	PKM	[R].GIFPVLCKDPVQEAWAEDVDLR.[V]	P14618 [468-489]	1xCarbamidomethyl [C7]		1	2557.28	-0.0836775
214	P14618	PKM	[K].IYVDDGLISLQVK.[Q]	P14618 [174-186]			0	1462.82
214	P14618	PKM	[R].LDIDSPPITAR.[N]	P14618 [33-43]			0	1197.65
214	P14618	PKM	[R].TATESFASDPILYRPVAVALDTK.[G]	P14618 [93-115]			0	2465.29	-0.00695221	-0.173	-0.866892	0.714764														-0.0446921		-0.117919		0.00480504						0.16941					-0.345849								-0.423054
214	P14618	PKM	[R].NTGIICTIGPASR.[S]	P14618 [44-56]	1xCarbamidomethyl [C6]		0	1359.7
214	P14618	PKM	[R].RLAPITSDPTEATAVGAVEASFK.[C]	P14618 [400-422]			1	2331.22
214	P14618	PKM	[R].RFDEILEASDGIMVAR.[G]	P14618 [279-294]			1	1821.92	0.18461													-0.921755				-0.64198															0.41221		-0.292842					-0.223604
214	P14618	PKM	[K].GADFLVTEVENGGSLGSK.[K]	P14618 [189-206]			0	1779.88	-0.0165399																								0.03283		-0.313286				-0.638695
214	P14618	PKM	[K].CDENILWLDYK.[N-]	P14618 [152-162]	1xCarbamidomethyl [C1]		0	1468.68	-0.00659076
214	P14618	PKM	[R].EAEAAIYHLQLFEELRR.[L]	P14618 [384-400]			1	2088.09
214	P14618	PKM	[K].FGVEQDVDMVFASFIR.[K]	P14618 [231-246]	1xOxidation [M9]		0	1875.89
214	P14618	PKM	[K].DPVQEAWAEDVDLR.[V]	P14618 [476-489]			0	1642.77
214	P14618	PKM	[K].KGDVVIVLTGWRPGSGFTNTMR.[V]	P14618 [505-526]			1	2391.26	0.047791															0.628418
214	P14618	PKM	[R].AGKPVICATQMLESMIK.[K]	P14618 [320-336]	1xCarbamidomethyl [C7]		0	1876.97
214	P14618	PKM	[R].LAPITSDPTEATAVGAVEASFK.[C]	P14618 [401-422]			0	2175.12	1.38888
214	P14618	PKM	[R].AEGSDVANAVLDGADCIMLSGETAK.[G]	P14618 [343-367]	1xCarbamidomethyl [C16]; 1xOxidation [M18]		0	2510.14
214	P14618	PKM	[R].AEGSDVANAVLDGADCIMLSGETAK.[G]	P14618 [343-367]	1xCarbamidomethyl [C16]		0	2494.14	-0.0654246
214	P14618	PKM	[K].GVNLPGAAVDLPAVSEK.[D]	P14618 [208-224]			0	1636.89
214	P14618	PKM	[K].CCSGAIIVLTK.[S]	P14618 [423-433]	2xCarbamidomethyl [C1; C2]		0	1221.63
214	P14618	PKM	[R].GDLGIEIPAEK.[V]	P14618 [295-305]			0	1141.61
214	P14618	PKM	[K].GDVVIVLTGWRPGSGFTNTMR.[V]	P14618 [506-526]			0	2263.17																									-2.20245					-1.1912		-0.55988		0.0204059
214	P14618	PKM	[K].ITLDNAYMEK.[C-]	P14618 [142-151]			0	1197.58
214	P14618	PKM	[K].GDYPLEAVR.[M]	P14618 [368-376]			0	1019.52
215	A0A087WY85	UBE2D3	[RK].IYHPNINSNGSICLDILR.[S]	A0A087WY85 [74-91]	1xCarbamidomethyl [C13]		0	2099.07	-0.595503																								-0.21577		0.0835721	-0.0240275		-0.263928					-0.23182
215	A0A087WY85	UBE2D3	[K].VLLSICSLLCDPNPDDPLVPEIAR.[I]	A0A087WY85 [103-126]	2xCarbamidomethyl [C6; C10]		0	2706.38										1.71303				1.5125																	-0.228935				-0.218187
215	A0A087WY85	UBE2D3	[R].SQWSPALTISK.[V-]	A0A087WY85 [92-102]			0	1217.65	-1.37751																														-0.541859		0.05034	-1.59388	-0.776829
216	P08758	ANXA5	[K].QVYEEEYGSSLEDDVVGDTSGYYQR.[M]	P08758 [127-151]			0	2888.24
216	P08758	ANXA5	[R].MLVVLLQANRDPDAGIDEAQVEQDAQALFQAGELK.[W]	P08758 [152-186]			1	3795.92
216	P08758	ANXA5	[R].MLVVLLQANRDPDAGIDEAQVEQDAQALFQAGELK.[W]	P08758 [152-186]	1xOxidation [M1]		1	3811.92
216	P08758	ANXA5	[K].YMTISGFQIEETIDRETSGNLEQLLLAVVK.[S]	P08758 [213-242]	1xOxidation [M2]		1	3413.75		-0.0171902												-0.0817972	-0.0538077				0.0470031												-0.0345532
216	P08758	ANXA5	[K].YMTISGFQIEETIDRETSGNLEQLLLAVVK.[S]	P08758 [213-242]			1	3397.76														0.111829
216	P08758	ANXA5	[R].SIPAYLAETLYYAMK.[G]	P08758 [246-260]			0	1733.88
216	P08758	ANXA5	[K].NFATSLYSMIK.[G]	P08758 [291-301]	1xOxidation [M9]		0	1290.64
216	P08758	ANXA5	[K].GLGTDEESILTLLTSR.[S]	P08758 [30-45]			0	1704.9	0.000404396
216	P08758	ANXA5	[R].DLLDDLKSELTGK.[F]	P08758 [64-76]			1	1446.77
216	P08758	ANXA5	[R].DPDAGIDEAQVEQDAQALFQAGELK.[W]	P08758 [162-186]			0	2658.25
216	P08758	ANXA5	[R].GTVTDFPGFDER.[A]	P08758 [7-18]			0	1340.61	-0.0129113																																	0.108109
216	P08758	ANXA5	[R].SIPAYLAETLYYAMK.[G]	P08758 [246-260]	1xOxidation [M14]		0	1749.88
216	P08758	ANXA5	[R].MLVVLLQANR.[D]	P08758 [152-161]			0	1156.69
216	P08758	ANXA5	[K].LIVALMKPSR.[L]	P08758 [80-89]			0	1127.7		-1.31753		-0.333003	-0.933875	-0.623043	-0.085857		-1.25701			-0.941923				-0.926326				-0.757428	-1.08454			-1.00678		-2.42141	-1.81642			-1.63034										-0.980197	-0.554059
216	P08758	ANXA5	[K].VLTEIIASR.[T]	P08758 [109-117]			0	1001.6																									0.0761126				-0.844966
216	P08758	ANXA5	[K].GAGTDDHTLIR.[V]	P08758 [261-271]			0	1155.58					0.220685					0.210223									0.0853564													-1.89831	-1.40139		-0.238751
216	P08758	ANXA5	[R].ETSGNLEQLLLAVVK.[S]	P08758 [228-242]			0	1613.91
216	P08758	ANXA5	[R].SEIDLFNIR.[K]	P08758 [277-285]			0	1106.58	3.32676e-05
216	P08758	ANXA5	[R].LYDAYELK.[H]	P08758 [90-97]			0	1014.51
217	P30086	PEBP1	[K].GNDISSGTVLSDYVGSGPPK.[G]	P30086 [94-113]			0	1949.95	-0.00857064										-0.575307		0.573432		-0.423424				0.427289		-1.27707	-0.416537	-1.94177	-1.99171	-1.18684	-0.973646	-1.60763	-1.62128	-0.2742	-1.0476	-0.951463	-1.60447	-0.142562				-0.132847				-0.367864
217	P30086	PEBP1	[K].WSGPLSLQEVDEQPQHPLHVTYAGAAVDELGK.[V]	P30086 [8-39]			0	3471.72	0.0125362											-0.609916			-0.743061			-0.162776		-0.179109	-0.224495	-0.0595302	-0.187007	-0.179782	-0.198924	-0.166465	-0.208232	-0.219822	-0.250227	-0.171057	-0.222005	-0.470824	-0.166328				-0.180707			1.1575
217	P30086	PEBP1	[R].YVWLVYEQDRPLK.[C]	P30086 [120-132]			0	1708.91	0.0822804													2.68089	0.202489			0.684243	1.62951	0.102079	-0.0333159	0.277298	-0.118463	-0.0883006	-0.112404	-0.0595015	-0.0657795	-0.0652888	-0.0838788	-0.0494803	-0.0411281	-0.154416	-0.20345	0.248174	-0.128226		1.46988		2.22044		2.62968
217	P30086	PEBP1	[R].APVAGTCYQAEWDDYVPK.[L]	P30086 [162-179]	1xCarbamidomethyl [C7]		0	2069.93	0.208795																						-1.7516	-1.51734	-1.32791	-2.06266		-1.19646
217	P30086	PEBP1	[K].LYTLVLTDPDAPSR.[K]	P30086 [63-76]			0	1560.83	-0.0188075														-0.19885				-0.609553	-0.236852	-0.119911	0.113435	-0.153431	-0.156347	-0.165147	-0.150872	-0.145344	-0.145842	-0.178872	-0.160069	-0.149556	-0.186434	-0.204867	-0.949979	-0.22559	-0.271087	-0.201622	0.897923
217	P30086	PEBP1	[K].LYTLVLTDPDAPSRK.[D]	P30086 [63-77]			1	1688.92	-0.0169812																			-0.065578	-0.0584977		-0.166236	-0.136306	-0.150414	-0.0818865	-0.199205	-0.0595511			-0.100333
217	P30086	PEBP1	[K].YREWHHFLVVNMK.[G]	P30086 [81-93]			1	1758.89	-0.348094																				0.842529		-0.178994	-1.0001	0.229047
217	P30086	PEBP1	[R].YVWLVYEQDRPLKCDEPILSNR.[S]	P30086 [120-141]	1xCarbamidomethyl [C14]		1	2793.4	0.057048
217	P30086	PEBP1	[K].YREWHHFLVVNMK.[G]	P30086 [81-93]	1xOxidation [M12]		1	1774.88	-0.44122														0.412542					0.301026			-0.185452	-0.289382	-0.211156	-0.91106								2.8069			1.13853
217	P30086	PEBP1	[K].NRPTSISWDGLDSGK.[L]	P30086 [48-62]			0	1632.8	-0.367034										0.637789	1.61461		1.17166			0.619125	-0.173189	-0.292231	-0.13262	-0.204124	0.00115177	-0.959424	-0.589815	-0.184723	-0.199441	-1.34677	-1.43304	-1.17387		-1.3019		0.421379	2.00317	-0.472127	-0.10623
217	P30086	PEBP1	[K].CDEPILSNR.[S]	P30086 [133-141]	1xCarbamidomethyl [C1]		0	1103.51																							-1.39562	-0.341337	-1.16542	-0.274534	0.0411754	0.0323874
217	P30086	PEBP1	[K].LYTLVLTDPDAPSRKDPK.[Y]	P30086 [63-80]			2	2029.1																							-0.673026	-0.649579
217	P30086	PEBP1	[K].WSGPLSLQEVDEQPQHPLHVTYAGAAVDELGKVLTPTQVK.[N]	P30086 [8-47]			1	4338.24
217	P30086	PEBP1	[R].EWHHFLVVNMK.[G]	P30086 [83-93]			0	1439.73																							-0.0658787	-0.255221							-0.365562
218	P14550	AKR1A1	[R].QIDDILSVASVRPAVLQVECHPYLAQNELIAHCQAR.[G]	P14550 [168-203]	2xCarbamidomethyl [C20; C33]		0	4114.1																-0.254674									0.0919379		-0.623985			0.155133
218	P14550	AKR1A1	[R].DPDEPVLLEEPVVLALAEK.[Y]	P14550 [222-240]			0	2076.11
218	P14550	AKR1A1	[R].GLEVTAYSPLGSSDR.[A]	P14550 [204-218]			0	1551.76
218	P14550	AKR1A1	[R].HIDCAAIYGNEPEIGEALKEDVGPGK.[A]	P14550 [43-68]	1xCarbamidomethyl [C4]		1	2782.34	-0.0634927								-0.276152																-0.228181		-0.194827				-0.00382464
218	P14550	AKR1A1	[R].HIDCAAIYGNEPEIGEALK.[E]	P14550 [43-61]	1xCarbamidomethyl [C4]		0	2100.01			0.257332										-0.117111	0.105042	0.398019					0.48812					0.0294775		-0.167345	-0.132133		-0.0444573	-0.130261
218	P14550	AKR1A1	[R].AWRDPDEPVLLEEPVVLALAEK.[Y]	P14550 [219-240]			1	2489.33	-0.0980644	0.431881																	-0.0348064				-0.248947	-0.0160056	-0.515017		-0.254357			-0.536775	-0.232318
218	P14550	AKR1A1	[K].VFDFTFSPEEMK.[Q]	P14550 [276-287]	1xOxidation [M11]		0	1492.67
218	P14550	AKR1A1	[K].VFDFTFSPEEMK.[Q]	P14550 [276-287]			0	1476.67
218	P14550	AKR1A1	[K].GLVQALGLSNFNSR.[Q]	P14550 [154-167]			0	1475.8
218	P14550	AKR1A1	[K].NADGTICYDSTHYK.[E]	P14550 [128-141]	1xCarbamidomethyl [C7]		0	1644.7																															-0.0892825
218	P14550	AKR1A1	[R].YIVPMLTVDGK.[R]	P14550 [298-308]	1xOxidation [M5]		0	1251.67
218	P14550	AKR1A1	[K].HHPEDVEPALR.[K]	P14550 [86-96]			0	1299.64																				-0.354138						0.408591	-0.15321	-0.127129		-0.00884759	-0.181717										-1.21099
218	P14550; P15121	AKR1A1	[K].MPILGLGTWK.[S]	P14550 [14-23]; P15121 [13-22]			0	1115.63
218	P14550	AKR1A1	[K].HHPEDVEPALRK.[T]	P14550 [86-97]			1	1427.74																											-0.107859			-0.109673	-0.093394									-0.219607
219	P01009	SERPINA1	[K].LYHSEAFTVNFGDTEEAK.[K]	P01009 [161-178]			0	2057.95																											-0.182827	-0.156478		-0.134226	-0.293325		0.0857027
219	P01009	SERPINA1	[K].LQHLENELTHDIITK.[F]	P01009 [284-298]			0	1803.96																						-0.242063					0.230926	-0.193407	-0.199091	-0.0546564							-0.0668246		0.0934461		0.584755
219	P01009	SERPINA1	[K].VFSNGADLSGVTEEAPLK.[L]	P01009 [335-352]			0	1833.92																									0.698511			-0.192027
219	P01009	SERPINA1	[R].TLNQPDSQLQLTTGNGLFLSEGLK.[L]	P01009 [126-149]			0	2574.34
219	P01009	SERPINA1	[K].DTEEEDFHVDQVTTVK.[V]	P01009 [226-241]			0	1891.86																										-0.235316	-0.210012						-0.254796		-0.256083
219	P01009	SERPINA1	[K].SVLGQLGITK.[V]	P01009 [325-334]			0	1015.61
219	P01009	SERPINA1	[R].LGMFNIQHCK.[K]	P01009 [248-257]	1xCarbamidomethyl [C9]		0	1247.6																											-0.00574163	-0.136118							0.31236
219	P01009	SERPINA1	[K].TDTSHHDQDHPTFNK.[I]	P01009 [35-49]			0	1779.77																											-0.0756096	-0.149851					-0.206698
219	P01009	SERPINA1	[K].KQINDYVEK.[G]	P01009 [179-187]			1	1136.59																			-0.24566		0.363974							-0.0841744					-0.184634								0.302296
220	F5GYJ8	OTUB1	[R].IQQEIAVQNPLVSER.[L]	F5GYJ8 [37-51]			0	1723.93																											-0.792832	-1.76953			0.0503463
220	F5GYJ8	OTUB1	[K].FFEHFIEGGR.[T]	F5GYJ8 [189-198]			0	1238.6
220	F5GYJ8	OTUB1	[K].EYAEDDNIYQQK.[I]	F5GYJ8 [60-71]			0	1515.66																											-0.151661														0.0924522
221	G0XQ39	STIM1	[R].LIEGVHPGSLVEK.[L]	G0XQ39 [665-677]			0	1377.77
221	G0XQ39	STIM1	[R].SHSPSSPDPDTPSPVGDSR.[A]	G0XQ39 [722-740]			0	1921.85							0.317535					-0.6315																					0.384029
222	Q6YP21	CCBL2; KYAT3	[K].LSAIPVSAFCNSETK.[S]	Q6YP21 [407-421]	1xCarbamidomethyl [C10]		0	1623.8																								-0.108137	-0.138976	-0.166247
222	Q6YP21	CCBL2; KYAT3	[K].AIILNTPHNPLGK.[V]	Q6YP21 [210-222]			0	1387.81
223	Q92665	MRPS31	[R].IEPLSPELVAAASAVADSLPFDK.[Q]	Q92665 [148-170]			0	2340.23	-0.137901
223	Q92665	MRPS31	[K].SELLSQLQQHEEESR.[A]	Q92665 [175-189]			0	1812.87																		-0.313441								-0.708952
224	A0A0A0MQT0	RBP1	[K].EFEEDLTGIDDR.[K]	A0A0A0MQT0 [132-143]			0	1438.63
224	A0A0A0MQT0	RBP1	[K].MLVNENFEEYLR.[A]	A0A0A0MQT0 [73-84]	1xOxidation [M1]		0	1572.74																										-0.0687886
225	X6R4W8	ZNF207	[K].LIHPDEDISLEER.[R]	X6R4W8 [382-394]			0	1565.78																			-1.25338				-0.30547			-1.68803	-0.300535	-0.660222	-0.231134	-0.162564	-0.168187	-0.230149	-0.350126
225	X6R4W8	ZNF207	[K].ETIDAVPNAIPGR.[T]	X6R4W8 [63-75]			0	1352.72
227	D3YTI2	ACP1	[K].LVTDQNISENWVIDSGAVSDWNVGR.[S]	D3YTI2 [30-54]			0	2774.34																					-0.0848622
227	D3YTI2; P24666	ACP1	[K].SVLFVCLGNICR.[S]	D3YTI2 [8-19]; P24666 [8-19]	2xCarbamidomethyl [C6; C11]		0	1437.73
227	D3YTI2	ACP1	[R].KLVTDQNISENWVIDSGAVSDWNVGR.[S]	D3YTI2 [29-54]			1	2902.43	-0.635731																				-0.0935834																				0.281146
228	P35914	HMGCL	[K].NINCSIEESFQR.[F]	P35914 [138-149]	1xCarbamidomethyl [C4]		0	1496.68
228	P35914	HMGCL	[K].FPGINYPVLTPNLK.[G]	P35914 [98-111]			0	1572.88																													-0.043886	-0.0489522		-0.0712119	-0.0817213
228	P35914	HMGCL	[K].LLEAGNFICQALNRK.[T]	P35914 [299-313]	1xCarbamidomethyl [C9]		1	1746.93		0.0725154													0.353827							0.583444							-0.0112642	0.36526
229	O43399	TPD52L2	[K].VVGDRENGSDNLPSSAGSGDKPLSDPAPF.[-]	O43399 [178-206]			1	2885.35																										-0.766829					-0.742942
229	O43399	TPD52L2	[R].TPAVEGLTEAEEEELRAELTKVEEEIVTLR.[Q]	O43399 [35-64]			2	3383.74	-0.104152
229	O43399	TPD52L2	[R].ENGSDNLPSSAGSGDKPLSDPAPF.[-]	O43399 [183-206]			0	2359.07																															-0.478572
229	O43399	TPD52L2	[K].GLLSDSMTDVPVDTGVAAR.[T]	O43399 [16-34]			0	1903.94
230	O00151	PDLIM1	[K].MNLASEPQEVLHIGSAHNR.[S]	O00151 [104-122]	1xOxidation [M1]		0	2119.03
230	O00151	PDLIM1	[K].VWSPLVTEEGK.[R]	O00151 [88-98]			0	1244.65																													-0.175481	-0.0175679				-0.466883		-0.169944
230	O00151	PDLIM1	[R].IKGCTDNLTLTVAR.[S]	O00151 [70-83]	1xCarbamidomethyl [C4]		1	1561.84																							0.0133604	-0.248106				-0.343628	-0.150704	-0.661899	-0.735234	-0.900435
230	O00151	PDLIM1	[K].TAASGVEANSRPLDHAQPPSSLVIDKESEVYK.[M]	O00151 [167-198]			1	3395.71																																							-0.115881
230	O00151	PDLIM1	[K].QSTSFLVLQEILESEEK.[G]	O00151 [212-228]			0	1980.02														-0.173093										0.162201		0.0998731		0.282493													-0.66058
230	O00151	PDLIM1	[K].DFEQPLAISR.[V]	O00151 [23-32]			0	1175.61																	-0.509497						0.341661			-0.2912		-0.303555	-0.184354	-0.100686					-0.490878	-0.180902		-0.1834		0.124233
230	O00151	PDLIM1	[K].AALANLCIGDVITAIDGENTSNMTHLEAQNR.[I]	O00151 [39-69]	1xCarbamidomethyl [C7]; 1xOxidation [M23]		0	3328.59
230	O00151	PDLIM1	[K].AALANLCIGDVITAIDGENTSNMTHLEAQNR.[I]	O00151 [39-69]	1xCarbamidomethyl [C7]		0	3312.59	-0.465494																											-0.227042
230	O00151	PDLIM1	[R].VITNQYNNPAGLYSSENISNFNNALESK.[T]	O00151 [139-166]			0	3101.48
231	P42126	ECI1	[K].NPPVNSLSLEFLTELVISLEK.[L]	P42126 [64-84]			0	2342.29																																-0.0776125
231	P42126	ECI1	[R].GVILTSDRPGVFSAGLDLTEMCGR.[S]	P42126 [93-116]	1xCarbamidomethyl [C22]		0	2551.26																																-0.00350838
231	P42126	ECI1	[R].VLVEPDAGAGVAVMK.[F]	P42126 [47-61]	1xOxidation [M14]		0	1471.78
231	P42126	ECI1	[R].YCIGLNETQLGIIAPFWLK.[D]	P42126 [172-190]	1xCarbamidomethyl [C2]		0	2236.18		-1.29442			-0.00768527											-0.441264													-0.730221	-0.153237		-0.029325	0.0163848
231	P42126	ECI1	[R].VLVEPDAGAGVAVMK.[F]	P42126 [47-61]			0	1455.79		0.17085									0.581501	0.620887							0.417199							-0.298969	-0.217874		-0.108184	0.359357	-0.145671	-0.0687842					-0.384331
231	P42126	ECI1	[R].DADVQNFVSFISK.[D-]	P42126 [271-283]			0	1469.73																				0.341959	1.04527			-0.428647									-0.0872197
231	P42126	ECI1	[K].FKNPPVNSLSLEFLTELVISLEK.[L]	P42126 [62-84]			1	2617.45						0.098181		-0.0469435																						-0.230619		-0.0867442	-0.0397184	-0.372334	0.00899732
231	P42126	ECI1	[K].AVQELWLR.[L]	P42126 [127-134]			0	1014.57
231	P42126	ECI1	[K].SLQMYLER.[L]	P42126 [289-296]			0	1039.52																																0.0244375	0.104153
231	P42126	ECI1	[K].SLQMYLER.[L]	P42126 [289-296]	1xOxidation [M4]		0	1055.52																																-0.010167
231	P42126	ECI1	[K].DTLENTIGHR.[A]	P42126 [191-200]			0	1155.58
232	Q15637	SF1	[R].HNLITEMVALNPDFKPPADYKPPATR.[V]	Q15637 [110-135]			0	2935.51	-0.186992
232	Q15637	SF1	[K].FQRPGDPQSAQDK.[A]	Q15637 [294-306]			0	1473.71								-0.00585805						0.204261				-0.443483		-0.734845	-0.524374	-0.453299	-0.313478		-0.844389		-1.15462	-1.40521	-0.835622	-1.07296
233	P21695	GPD1	[K].LPPNVVAVPDVVQAAEDADILIFVVPHQFIGK.[I]	P21695 [69-100]			0	3410.87	-0.113727	-0.0471678																								-0.291982	-0.548891	-0.181341	-0.265873	-0.511007
234	Q9Y3B8	REXO2	[K].ESTITLQQAEYEFLSFVR.[Q]	Q9Y3B8 [112-129]			0	2161.08																										-0.274909	-0.427227		-0.522751	-0.0794757		-0.121648			-0.419239
235	Q15942	ZYX	[K].VSSIDLEIDSLSSLLDDMTK.[N]	Q15942 [141-160]			0	2181.08																														-0.148474
235	Q15942	ZYX	[R].GPPASSPAPAPK.[F]	Q15942 [254-265]			0	1076.57																			-0.0283047				0.755588				-0.616296	-0.0608913		-0.433755			-0.218327
235	Q15942	ZYX	[K].VNPFRPGDSEPPPAPGAQR.[A]	Q15942 [36-54]			0	1988.99
235	Q15942	ZYX	[K].FSPGAPGGSGSQPNQK.[L]	Q15942 [280-295]			0	1515.72
236	Q3KRA9	ALKBH6	[R].VEQAPPVIYYVPDFISK.[E]	Q3KRA9 [16-32]			0	1965.04																											-0.231886
236	Q3KRA9	ALKBH6	[R].RPEDDDPTEQPRPPPRPTTSLLLEPR.[S]	Q3KRA9 [142-167]			0	3009.54
237	P84098	RPL19	[K].VWLDPNETNEIANANSR.[Q]	P84098 [22-38]			0	1942.93																											-0.685422
238	P55809	OXCT1	[R].AGGAGVPAFYTPTGYGTLVQEGGSPIK.[Y]	P55809 [147-173]			0	2595.31																											-0.0069705
239	P17050	NAGA	[K].INQDPLGIQGR.[R]	P17050 [305-315]			0	1210.65																											-1.7036	-0.136709		0.644459		-0.0648945			-0.0375715	1.08738
240	P08397	HMBS	[R].GPQLAAQNLGISLANLLLSK.[G]	P08397 [326-345]			0	2021.18		0.0979994																									-0.125232					-0.0778884	-0.143152		-0.192428
240	P08397	HMBS	[K].DQDILDLVGVLHDPETLLR.[C]	P08397 [228-246]			0	2161.15																											-0.281629					-0.123264
241	Q16630	CPSF6	[R].AVSDASAGDYGSAIETLVTAISLIK.[Q]	Q16630 [432-456]			0	2452.28	-0.175547		-0.251699					-0.223817				-0.314404									-0.474815						-0.715177			-0.529619		-0.152565	0.161969	0.100111
242	P18510	IL1RN	[R].LQLEAVNITDLSENR.[K]	P18510 [103-117]			0	1714.9					0.0105234																			0.463382			-0.478073				-0.32096		-0.203902
243	D6REE5	RACK1	[K].IIVDELKQEVISTSSK.[A]	D6REE5 [283-298]			1	1789	-0.0264676																																		-0.831405						-0.177335
243	D6REE5	RACK1	[K].HLYTLDGGDIINALCFSPNR.[Y]	D6REE5 [244-263]	1xCarbamidomethyl [C15]		0	2276.11	-0.0703954
243	D6REE5	RACK1	[R].YWLCAATGPSIK.[I]	D6REE5 [264-275]	1xCarbamidomethyl [C4]		0	1366.68	0.0207866
243	D6REE5	RACK1	[K].GHNGWVTQIATTPQFPDMILSASR.[DVG]	D6REE5 [13-36]			0	2627.3	-0.035217
244	G3V5Z7	PSMA6	[R].ILTEAEIDAHLVALAERD.[-]	G3V5Z7 [235-252]			1	1979.04
244	G3V5Z7	PSMA6	[R].ILTEAEIDAHLVALAER.[D]	G3V5Z7 [235-251]			0	1864.02
244	G3V5Z7	PSMA6	[K].LLDSSTVTHLFK.[I]	G3V5Z7 [60-71]			0	1360.75
244	G3V5Z7	PSMA6	[K].YGYEIPVDMLCK.[R]	G3V5Z7 [105-116]	1xCarbamidomethyl [C11]		0	1487.69
244	G3V5Z7	PSMA6	[K].AINQGGLTSVAVR.[G]	G3V5Z7 [31-43]			0	1285.72																																		0.390471		0.774214
245	P27694	RPA1	[K].GDTNIKPILQVINIRPITTGNSPPR.[Y]	P27694 [17-41]			0	2714.53																									-0.106982		-0.211679	-0.215612			-0.218378	-0.054345
246	P31689	DNAJA1	[K].QISQAYEVLSDAK.[K]	P31689 [47-59]			0	1451.74
246	P31689	DNAJA1	[K].EGGAGGGFGSPMDIFDMFFGGGGR.[M]	P31689 [74-97]			0	2322.99
246	P31689	DNAJA1	[K].ETTYYDVLGVKPNATQEELK.[K]	P31689 [4-23]			0	2298.15
246	P31689	DNAJA1	[K].ETTYYDVLGVKPNATQEELKK.[A]	P31689 [4-24]			1	2426.24														0.189701														-0.970974
246	P31689	DNAJA1	[K].YHPDKNPNEGEK.[F]	P31689 [33-44]			1	1427.65
247	P62328	TMSB4X	[K].TETQEKNPLPSK.[E]	P62328 [21-32]			1	1371.71																							0.310362					-1.08565				0.0150874
248	Q9NR12	PDLIM7	[R].TEAPAPASSTPQEPWPGPTAPSPTSRPPWAVDPAFAER.[Y]	Q9NR12 [196-233]			0	3953.91																												-0.591634
249	Q99714	HSD17B10	[R].LVGQGASAVLLDLPNSGGEAQAK.[K]	Q99714 [30-52]			0	2195.17	-0.0264453																											-0.198955
249	Q99714	HSD17B10	[R].LGDPAEYAHLVQAIIENPFLNGEVIR.[L]	Q99714 [227-252]			0	2878.51	-0.159485
250	Q13123	IK	[R].DSEPFSNPLAPDGHDVDDPHSFHQSK.[L]	Q13123 [5-30]			0	2875.26																												-0.174327
250	Q13123	IK	[K].QLGDFFGMSNSYAECYPATMDDMAVDSDEEVDYSK.[M]	Q13123 [434-468]	1xCarbamidomethyl [C15]; 1xOxidation [M8]		0	4003.58
251	Q8NC56	LEMD2	[R].ELQALGFQPGPITDTTR.[D]	Q8NC56 [12-28]			0	1843.95																					0.0287765						-0.0674129	-0.439306		0.175991
252	Q00688	FKBP3	[K].FLQEHGSDSFLAEHK.[L]	Q00688 [28-42]			0	1744.83
252	Q00688	FKBP3	[K].DHLVTAYNHLFETK.[R]	Q00688 [57-70]			0	1687.84															0.877626			0.166825		-0.534974	-0.226098	0.207306		-1.00793	-2.18305			-2.64135
252	Q00688	FKBP3	[K].SEETLDEGPPK.[Y]	Q00688 [100-110]			0	1201.56
252	Q00688	FKBP3	[K].ARLEIEPEWAYGK.[K]	Q00688 [188-200]			1	1561.8
253	Q8NC51	SERBP1	[R].FDQLFDDESDPFEVLK.[A]	Q8NC51 [17-32]			0	1943.89	-0.0715178																												-0.157665	-0.171873	-0.100758										-0.417659
253	Q8NC51	SERBP1	[K].SEEAHAEDSVMDHHFR.[K]	Q8NC51 [330-345]	1xOxidation [M11]		0	1912.79
253	Q8NC51	SERBP1	[K].KEETQPPVALKK.[E]	Q8NC51 [92-103]			2	1367.79
253	Q8NC51	SERBP1	[R].KNPLPPSVGVVDK.[K]	Q8NC51 [79-91]			1	1349.78										0.556574																			-0.0136881	0.0142867	0.0676945	-0.322299	-0.907554
253	Q8NC51	SERBP1	[K].KEETQPPVALK.[K]	Q8NC51 [92-102]			1	1239.69
253	Q8NC51	SERBP1	[K].RGGSGSHNWGTVK.[D]	Q8NC51 [216-228]			1	1342.66
253	Q8NC51	SERBP1	[R].KPNEGADGQWK.[K]	Q8NC51 [310-320]			0	1229.59								-0.133701																									0.671377
253	Q8NC51	SERBP1	[K].SEEAHAEDSVMDHHFR.[K]	Q8NC51 [330-345]			0	1896.79
254	P45954	ACADSB	[K].VDASVAVFCEIQNTLINTLIR.[K]	P45954 [131-151]	1xCarbamidomethyl [C9]		0	2376.26	-0.074688							-0.322125																																	0.074774
254	P45954	ACADSB	[K].RLFDFQGLQHQVAHVATQLEAAR.[L]	P45954 [325-347]			1	2635.39	-0.0890763
254	P45954	ACADSB	[K].YYASEIAGQTTSK.[C]	P45954 [372-384]			0	1418.68
254	P45954	ACADSB	[R].LFDFQGLQHQVAHVATQLEAAR.[L]	P45954 [326-347]			0	2479.28	-0.0796477
254	P45954	ACADSB	[K].IGTIYEGASNIQLNTIAK.[H]	P45954 [409-426]			0	1906.03
255	A0A0A0MTE8	NAV2	[R].TDDITSGYMTDGGLGLYTR.[R]	A0A0A0MTE8 [899-917]	1xOxidation [M9]		0	2051.92																									0.134141								-0.475809	-0.697596	-0.874743	0.344162
256	P15924	DSP	[R].FLEFQYLTGGLVDPEVHGR.[I]	P15924 [2726-2744]			0	2177.1																									1.25024									-0.114571	-0.52331	-0.250862
256	P15924	DSP	[K].GFFDPNTEENLTYLQLK.[E]	P15924 [2414-2430]			0	2028.99
257	Q13907	IDI1	[K].AELGIPLEEVPPEEINYLTR.[I]	Q13907 [114-133]			0	2282.19																																			-0.253131			0.119538
258	Q01469	FABP5	[RK].TQTVCNFTDGALVQHQEWDGK.[E]	Q01469 [83-103]	1xCarbamidomethyl [C5]		0	2434.11								-0.11699		-0.22012																									-0.505049
259	O00267	SUPT5H	[K].VRDTYLDTQVVGQTGVIR.[S]	O00267 [988-1005]			1	2020.08
259	O00267	SUPT5H	[K].VVSISSEHLEPITPTK.[N]	O00267 [1022-1037]			0	1736.94
259	O00267	SUPT5H	[R].EATGVLLSIDGEDGIVR.[M]	O00267 [1050-1066]			0	1743.91
260	A0A087X0X3	HNRNPM	[K].MEEESGAPGVPSGNGAPGPK.[G]	A0A087X0X3 [18-37]			0	1867.85
260	A0A087X0X3	HNRNPM	[K].FNECGHVLYADIK.[M]	A0A087X0X3 [673-685]	1xCarbamidomethyl [C4]		0	1565.74
260	A0A087X0X3	HNRNPM	[K].DKFNECGHVLYADIK.[M]	A0A087X0X3 [671-685]	1xCarbamidomethyl [C6]		1	1808.86
260	A0A087X0X3	HNRNPM	[R].INEILSNALK.[R]	A0A087X0X3 [372-381]			0	1114.65
261	A6NFX8	NUDT5	[R].LDALVAEEHLTVDAR.[V]	A6NFX8 [195-209]			0	1651.86																									0.139613				-0.0742141
261	A6NFX8	NUDT5	[R].TLHYECIVLVK.[Q]	A6NFX8 [84-94]	1xCarbamidomethyl [C6]		0	1374.74																																		-0.0826349
261	A6NFX8	NUDT5	[K].EQTADGVAVIPVLQR.[T]	A6NFX8 [69-83]			0	1595.88
261	A6NFX8	NUDT5	[R].VYSYALALK.[H]	A6NFX8 [210-218]			0	1027.58
262	Q16740	CLPP	[K].VLVHPPQDGEDEPTLVQKEPVEAAPAAEPVPAST.[-]	Q16740 [244-277]			1	3517.77
263	P61960	UFM1	[K].FAAEEFKVPAATSAIITNDGIGINPAQTAGNVFLK.[H]	P61960 [35-69]			1	3575.87		-0.576488						0.0493822			-0.432444		-0.243108							-0.0698554	-0.277089											0.221137
263	P61960	UFM1	[K].VPAATSAIITNDGIGINPAQTAGNVFLK.[H]	P61960 [42-69]			0	2753.48																				-0.232653
263	P61960	UFM1	[K].VLSVPESTPFTAVLK.[F]	P61960 [20-34]			0	1587.9																				-0.103738	-0.147617											-0.163599	-0.169123
264	P55209	NAP1L1	[R].LDGLVETPTGYIESLPR.[V]	P55209 [56-72]			0	1859.97	0.0306384
264	P55209	NAP1L1	[K].NVDLLSDMVQEHDEPILK.[H]	P55209 [177-194]			0	2095.04	-0.124936	-0.0458412
264	P55209	NAP1L1	[R].FEIINAIYEPTEEECEWKPDEEDEISEELKEK.[A]	P55209 [118-149]	1xCarbamidomethyl [C15]		1	3970.8	-0.0767432
265	P11216	PYGB	[K].LQDFNVGDYIEAVLDR.[N]	P11216 [255-270]			0	1866.92	-0.0417603	-0.167926
266	Q99497	PARK7	[K].KEGPYDVVVLPGGNLGAQNLSESAAVK.[E]	Q99497 [63-89]			1	2712.42					-0.146562	-0.135033		-0.10461	-0.135427	-0.147696	-0.304375	-0.57881	-0.10807	-0.159805	-0.232172	-0.154145		-0.233959	-0.131872	-0.141027	-0.166087	-0.572664
266	Q99497	PARK7	[R].KGLIAAICAGPTALLAHEIGFGSK.[V]	Q99497 [99-122]	1xCarbamidomethyl [C8]		1	2395.32										-0.192107				-0.113526	-0.253989			-0.157354
266	Q99497	PARK7	[R].GPGTSFEFALAIVEALNGK.[E]	Q99497 [157-175]			0	1921.01	0.191815				0.0745747	-0.0676336	0.0999841	-0.0382894	0.136883	-0.0688152	0.0288266	0.0894924	-0.0272822	-0.0768641	-0.149813	-0.0396541	4.84989e-05	-0.148954	0.0607278	-0.112305	-0.165161	-0.480027	-0.246908
266	Q99497	PARK7	[K].VTVAGLAGKDPVQCSR.[D]	Q99497 [33-48]	1xCarbamidomethyl [C14]		1	1657.87						0.279755		0.00101811		-0.0413649				-0.0515408	-0.132236			-0.212562		-0.180434	-0.182684			0.124053					-1.4001
266	Q99497	PARK7	[K].EGPYDVVVLPGGNLGAQNLSESAAVK.[E]	Q99497 [64-89]			0	2584.33	-0.0197608							-0.0656673		-0.144379	-1.1069		-0.0975579	-0.37198	-0.258297	-0.465741		-0.224408	-0.44449	-0.208668	-0.489072								-0.986875
266	Q99497	PARK7	[R].DVVICPDASLEDAKK.[E]	Q99497 [49-63]	1xCarbamidomethyl [C5]		1	1659.83						0.426772		-0.0616459			0.776914			-0.187221	-0.132938			-0.207619		-0.151965
266	Q99497	PARK7	[R].DVVICPDASLEDAK.[K]	Q99497 [49-62]	1xCarbamidomethyl [C5]		0	1531.73
266	Q99497	PARK7	[R].GPGTSFEFALAIVEALNGKEVAAQVK.[A]	Q99497 [157-182]			1	2646.41
266	Q99497	PARK7	[K].GLIAAICAGPTALLAHEIGFGSK.[V]	Q99497 [100-122]	1xCarbamidomethyl [C7]		0	2267.22	-0.011322
267	P63167	DYNLL1	[K].NADMSEEMQQDSVECATQALEK.[Y]	P63167 [10-31]	1xCarbamidomethyl [C15]		0	2514.04																												-0.106537
267	P63167	DYNLL1	[K].KYNPTWHCIVGR.[N]	P63167 [49-60]	1xCarbamidomethyl [C8]		1	1530.76																									0.017249			0.0052342
267	P63167	DYNLL1	[K].YNPTWHCIVGR.[N]	P63167 [50-60]	1xCarbamidomethyl [C7]		0	1402.67
267	P63167	DYNLL1	[R].NFGSYVTHETK.[H]	P63167 [61-71]			0	1282.61																			0.815926						-0.0463638			-0.0410118			-0.0474146
268	A0A0C4DG17	RPSA	[R].ADHQPLTEASYVNLPTIALCNTDSPLR.[Y]	A0A0C4DG17 [134-160]	1xCarbamidomethyl [C20]		0	2996.48	-0.129041
268	A0A0C4DG17	RPSA	[R].FTPGTFTNQIQAAFR.[E]	A0A0C4DG17 [108-122]			0	1698.86	-0.0560463
268	A0A0C4DG17	RPSA	[K].FAAATGATPIAGR.[F]	A0A0C4DG17 [95-107]			0	1203.65																			0.158335					0.830423	0.21778											-0.014986	0.999476				-0.116051
268	A0A0C4DG17	RPSA	[R].AIVAIENPADVSVISSR.[N]	A0A0C4DG17 [64-80]			0	1740.95	-0.137898												0.2871												-0.719398
268	A0A0C4DG17	RPSA	[R].YVDIAIPCNNK.[G]	A0A0C4DG17 [161-171]	1xCarbamidomethyl [C8]		0	1306.65
268	A0A0C4DG17	RPSA	[R].EHPWEVMPDLYFYRDPEEIEKEEQAAAEK.[A]	A0A0C4DG17 [197-225]			2	3578.64	-0.125194
268	A0A0C4DG17	RPSA	[R].EHPWEVMPDLYFYRDPEEIEKEEQAAAEK.[A]	A0A0C4DG17 [197-225]	1xOxidation [M7]		2	3594.64
269	Q9H444	CHMP4B	[R].EALENANTNTEVLK.[N]	Q9H444 [94-107]			0	1545.78
269	Q9H444	CHMP4B	[K].QLAQIDGTLSTIEFQR.[E]	Q9H444 [78-93]			0	1819.95															-0.0356188
269	Q9H444	CHMP4B	[K].GGPTPQEAIQR.[L]	Q9H444 [18-28]			0	1153.6							-0.652957
269	Q9H444	CHMP4B	[K].KIEQELTAAK.[K]	Q9H444 [46-55]			1	1130.64
270	Q9BY32	ITPA	[K].LEEVVQILGDKFPCTLVAQK.[I]	Q9BY32 [20-39]	1xCarbamidomethyl [C14]		1	2287.24																																0.0628709	-0.00804467		-0.0611256
270	Q9BY32	ITPA	[K].IDLPEYQGEPDEISIQK.[C]	Q9BY32 [40-56]			0	1973.97
270	Q9BY32	ITPA	[K].KLEEVVQILGDKFPCTLVAQK.[I]	Q9BY32 [19-39]	1xCarbamidomethyl [C15]		2	2415.33	-0.0708853																															-0.0221854	-0.125767
270	Q9BY32	ITPA	[R].ALLELQEYFGSLAA.[-]	Q9BY32 [181-194]			0	1524.79
270	Q9BY32	ITPA	[K].LKPEGLHQLLAGFEDK.[S]	Q9BY32 [95-110]			0	1794.97
270	Q9BY32	ITPA	[K].KIVFVTGNAK.[K]	Q9BY32 [9-18]			1	1076.65																																-0.0715125
271	P25789	PSMA4	[R].YLLQYQEPIPCEQLVTALCDIK.[Q]	P25789 [97-118]	2xCarbamidomethyl [C11; C19]		0	2694.35	-0.0640305							0.115497							0.983476																							0.000481943
271	P25789	PSMA4	[K].LNEDMACSVAGITSDANVLTNELR.[L]	P25789 [68-91]	1xCarbamidomethyl [C7]		0	2593.22	-0.102518
271	P25789	PSMA4	[K].LLDEVFFSEK.[I]	P25789 [55-64]			0	1226.63
272	Q15393	SF3B3	[K].FVIHPESNNLIIIETDHNAYTEATK.[A]	Q15393 [788-812]			0	2869.44
272	Q15393	SF3B3	[R].NENQLIIFADDTYPR.[W]	Q15393 [1017-1031]			0	1808.88
272	Q15393	SF3B3	[R].KFVIHPESNNLIIIETDHNAYTEATK.[A]	Q15393 [787-812]			1	2997.53
272	Q15393	SF3B3	[K].LGAVFNQVAFPLQYTPR.[K]	Q15393 [770-786]			0	1921.03
272	Q15393	SF3B3	[K].HIANYISGIQTIGHR.[V]	Q15393 [985-999]			0	1679.9
272	Q15393	SF3B3	[K].ITLETDEDMVTEIR.[L]	Q15393 [313-326]	1xOxidation [M9]		0	1680.8
272	Q15393	SF3B3	[R].WVTTASLLDYDTVAGADK.[F]	Q15393 [1032-1049]			0	1925.95
272	Q15393	SF3B3	[K].TPVEEVPAAIAPFQGR.[V]	Q15393 [943-958]			0	1681.89
272	Q15393	SF3B3	[R].TVLDPVTGDLSDTR.[T]	Q15393 [677-690]			0	1488.75
272	Q15393	SF3B3	[K].RNENQLIIFADDTYPR.[W]	Q15393 [1016-1031]			1	1964.98
272	Q15393	SF3B3	[R].FSNTGEDWYVLVGVAK.[D]	Q15393 [896-911]			0	1784.89
272	Q15393	SF3B3	[R].ATGISFAIHGNFSGTK.[Q]	Q15393 [11-26]			0	1607.82
272	Q15393	SF3B3	[R].FLAVGLVDNTVR.[I]	Q15393 [604-615]			0	1303.74												0.196695
272	Q15393	SF3B3	[R].ELAAEMAAAFLNENLPESIFGAPK.[A]	Q15393 [833-856]			0	2533.26
272	Q15393	SF3B3	[K].AGNGQWASVIR.[V]	Q15393 [857-867]			0	1158.6
272	Q15393	SF3B3	[K].YSEPLEEHGNFLITVPGGSDGPSGVLICSENYITYK.[N]	Q15393 [224-259]	1xCarbamidomethyl [C28]		0	3942.87																																									-0.0706653
272	Q15393	SF3B3	[K].ILELLRPDPNTGK.[V]	Q15393 [37-49]			0	1465.84
272	Q15393	SF3B3	[R].LTISSPLEAHK.[A]	Q15393 [152-162]			0	1195.67								-0.668409		-0.0347785
272	Q15393	SF3B3	[R].IVILEYQPSK.[N-]	Q15393 [87-96]			0	1189.68
273	Q12905	ILF2	[R].NQDLAPNSAEQASILSLVTK.[I]	Q12905 [61-80]			0	2099.1
273	Q12905	ILF2	[K].ILPTLEAVAALGNK.[V]	Q12905 [128-141]			0	1409.84
273	Q12905	ILF2	[K].INNVIDNLIVAPGTFEVQIEEVR.[Q]	Q12905 [81-103]			0	2582.38
273	Q12905	ILF2	[R].VKPAPDETSFSEALLK.[R]	Q12905 [44-59]			0	1731.92	0.380069																								0.0947845	-0.0780528
273	Q12905	ILF2	[R].WFEENASQSTVK.[V]	Q12905 [210-221]			0	1425.66	-0.404594	-1.5918
273	Q12905	ILF2	[K].ILGQEGDASYLASEISTWDGVIVTPSEK.[A]	Q12905 [329-356]			0	2965.47																					0.361068																	0.113785			-0.130051
273	Q12905	ILF2	[K].VLQSALAAIR.[H]	Q12905 [197-206]			0	1041.64
273	Q12905	ILF2	[R].VKPAPDETSFSEALLKR.[N]	Q12905 [44-60]			1	1888.02
273	Q12905	ILF2	[R].KLDPELHLDIK.[V]	Q12905 [186-196]			1	1320.75	-0.0136217
273	Q12905	ILF2	[R].AQDPSEVLTMLTNETGFEISSSDATVK.[I]	Q12905 [148-174]			0	2870.36
273	Q12905	ILF2	[K].LDPELHLDIK.[V]	Q12905 [187-196]			0	1192.66
273	Q12905	ILF2	[K].ILITTVPPNLR.[K]	Q12905 [175-185]			0	1236.77	0.00526914
273	Q12905	ILF2	[R].QPLALNVAYR.[R]	Q12905 [260-269]			0	1144.65
273	Q12905	ILF2	[R].ILSHGGFRK.[I]	Q12905 [320-328]			1	1014.58
274	P00390	GSR	[K].LDYNNIPTVVFSHPPIGTVGLTEDEAIHK.[Y]	P00390 [406-434]			0	3176.63	-0.0663301																				0.446852
274	P00390	GSR	[K].ALLTPVAIAAGR.[K]	P00390 [380-391]			0	1152.71	-0.0542513
274	P00390	GSR	[K].TYSTSFTPMYHAVTK.[R]	P00390 [442-456]			0	1733.82															0.902768						-0.0121568				0.158293
274	P00390	GSR	[R].LNAIYQNNLTK.[SH]	P00390 [154-164]			0	1291.7																					-0.425822			0.822945											-0.171317
274	P00390	GSR	[R].GHAAFTSDPKPTIEVSGK.[K]	P00390 [172-189]			0	1841.94								-0.785779			-0.0681158																									0.244404
274	P00390	GSR	[K].GHIIVDEFQNTNVK.[G]	P00390 [355-368]			0	1613.83					-0.338381																	0.290136			-0.0256143
274	P00390	GSR	[K].ADFDNTVAIHPTSSEELVTLR.[-]	P00390 [502-522]			0	2315.15		0.919088		0.965225		0.552542	0.534476		1.42357		1.17686					1.06599	0.572781	0.819911	0.735422				0.760592	0.666195								-0.851574
274	P00390	GSR	[R].LFEYKEDSK.[L]	P00390 [397-405]			1	1158.57
275	P31937	HIBADH	[R].IITMLPTSINAIEAYSGANGILK.[K]	P31937 [99-121]	1xOxidation [M4]		0	2406.29																							-0.0427331
275	P31937	HIBADH	[K].EFQDAGEQVVSSPADVAEK.[A]	P31937 [77-95]			0	2005.93																							-0.0775676	-0.126878
275	P31937	HIBADH	[K].KGSLLIDSSTIDPAVSK.[E]	P31937 [125-141]			1	1730.95																							-0.0202962	0.0343828
275	P31937	HIBADH	[K].KDFSSVFQFLR.[E]	P31937 [321-331]			1	1373.72																							0.0219007	0.0737668	-0.0937807
275	P31937	HIBADH	[K].KDFSSVFQFLREEETF.[-]	P31937 [321-336]			2	2008.97																							0.0281967
275	P31937	HIBADH	[K].HGYPLIIYDVFPDACK.[E]	P31937 [61-76]	1xCarbamidomethyl [C15]		0	1907.94						-0.0660244																	0.00134058	0.285667		-0.0844449	-0.642313
275	P31937	HIBADH	[K].SPILLGSLAHQIYR.[M]	P31937 [298-311]			0	1567.9										0.398663												0.227255	0.0101929	0.0144729	0.0327435	0.107301		0.0357718
276	P55786	NPEPPS	[R].AQELDALDNSHPIEVSVGHPSEVDEIFDAISYSK.[G]	P55786 [407-440]			0	3711.77	-0.219296																						-0.0173062
276	P55786	NPEPPS	[K].VTLSFPSTLQTGTGTLK.[I]	P55786 [129-145]			0	1750.96
276	P55786	NPEPPS	[R].LGLQNDLFSLAR.[A]	P55786 [616-627]			0	1346.74
276	P55786	NPEPPS	[R].TIQQCCENILLNAAWLK.[R]	P55786 [883-899]	2xCarbamidomethyl [C5; C6]		0	2075.04			0.439617			0.629205			0.418929			0.493253		0.319304	0.316542		0.232764				0.275507	0.282354		0.0731688		-0.226271					-0.316016				0.0050407
276	P55786	NPEPPS	[K].LNLGTVGFYR.[T]	P55786 [581-590]			0	1139.62
276	P55786	NPEPPS	[K].AFFESHPAPSAER.[T]	P55786 [870-882]			0	1445.68	-0.282303																											0.559031
276	P55786	NPEPPS	[R].VLGATLLPDLIQK.[V]	P55786 [782-794]			0	1380.85
276	P55786	NPEPPS	[K].VLTFALSEEVRPQDTVSVIGGVAGGSK.[H]	P55786 [795-821]			0	2716.45
276	P55786	NPEPPS	[K].LSVEGFAVDK.[M]	P55786 [854-863]			0	1064.56
276	P55786	NPEPPS	[K].DYFNVPYPLPK.[I]	P55786 [294-304]			0	1352.69
276	P55786	NPEPPS	[K].QMGFPLIYVEAEQVEDDR.[L]	P55786 [500-517]	1xOxidation [M2]		0	2155
276	P55786	NPEPPS	[K].IDFVGELNDK.[M]	P55786 [146-155]			0	1149.58	-0.797222																																	-0.0882073				-0.246027	-0.42071
276	P55786	NPEPPS	[K].ATFDISLVVPK.[D]	P55786 [198-208]			0	1189.68
276	P55786	NPEPPS	[R].DAESIHQYLLQR.[K]	P55786 [901-912]			0	1472.75																					-0.560146
276	P55786	NPEPPS	[R].VALSNMNVIDR.[K]	P55786 [211-221]			0	1231.65
277	O60701	UGDH	[R].EQIVVDLSHPGVSEDDQVSR.[L]	O60701 [374-393]			0	2209.07	0.156605						0.100118	-0.799585				-0.0251674								-0.17077																		-0.285548	-0.497297	-0.150508
277	O60701	UGDH	[R].IFDANTKPNLNLQVLSNPEFLAEGTAIK.[D]	O60701 [143-170]			0	3057.63	-0.0436957
277	O60701	UGDH	[R].ISSINSISALCEATGADVEEVATAIGMDQR.[I]	O60701 [231-260]	1xCarbamidomethyl [C11]		0	3108.48																			0.0183053																					-0.183675
277	O60701	UGDH	[K].YLMDEGAHLHIYDPK.[V]	O60701 [356-370]			0	1801.86																																						0.221308		1.0598
277	O60701	UGDH	[R].YWQQVIDMNDYQR.[R]	O60701 [299-311]	1xOxidation [M8]		0	1774.79
277	O60701	UGDH	[R].YWQQVIDMNDYQR.[R]	O60701 [299-311]			0	1758.79	-0.0262692
277	O60701	UGDH	[K].ILTTNTWSSELSK.[L]	O60701 [208-220]			0	1479.77	0.0351432																																					-0.150166		-0.0358858	-0.0716158
277	O60701	UGDH	[R].INAWNSPTLPIYEPGLK.[E]	O60701 [42-58]			0	1913.02	-0.0345935				0.318239									-0.050434	0.995846																										-0.121568
277	O60701	UGDH	[R].IIDSLFNTVTDKK.[I]	O60701 [318-330]			1	1493.82	1.17548																																								0.0220761
277	O60701	UGDH	[K].NLFFSTNIDDAIK.[E]	O60701 [68-80]			0	1497.76	0.00832651																																								-0.119197
277	O60701	UGDH	[R].VLDGLHNELQTIGFQIETIGKK.[V]	O60701 [444-465]			1	2453.34	-0.00137335
277	O60701	UGDH	[R].VLDGLHNELQTIGFQIETIGK.[K]	O60701 [444-464]			0	2325.24	0.150981	-0.795061	-0.384409							-0.105876				-0.242523					-0.410427	-0.236266		-0.226008					0.196284	0.194722	0.0133921				-0.312884		0.0681501			-0.697514			-0.25892
277	O60701	UGDH	[R].AVQALCAVYEHWVPR.[E]	O60701 [191-205]	1xCarbamidomethyl [C6]		0	1798.91	-0.0140476																					-1.1065			0.923868					0.944818											-0.119889
277	O60701	UGDH	[K].EADLVFISVNTPTK.[T]	O60701 [81-94]			0	1533.82
277	O60701	UGDH	[K].DVLNLVYLCEALNLPEVAR.[Y]	O60701 [280-298]	1xCarbamidomethyl [C9]		0	2201.16	-0.0839141							0.383168																					0.39429	0.533649										-0.077976	-0.12783
277	O60701	UGDH	[K].LAANAFLAQR.[I]	O60701 [221-230]			0	1074.61
277	O60701	UGDH	[K].ICCIGAGYVGGPTCSVIAHMCPEIR.[V]	O60701 [7-31]	4xCarbamidomethyl [C2; C3; C14; C21]		0	2778.27	0.0682204		0.0149219																							-0.610445															-0.11115
277	O60701	UGDH	[K].RIPYAPSGEIPK.[F]	O60701 [470-481]			1	1327.74	0.0138382																		-0.35313							0.179354			-0.15694			0.315199						-0.0455511		-0.0173426	-0.132434
277	O60701	UGDH	[R].RIFDANTKPNLNLQVLSNPEFLAEGTAIK.[D]	O60701 [142-170]			1	3213.73	-0.0268167
277	O60701	UGDH	[K].YLMDEGAHLHIYDPK.[V]	O60701 [356-370]	1xOxidation [M3]		0	1817.85
277	O60701	UGDH	[R].VTVVDVNESR.[I]	O60701 [32-41]			0	1117.58
277	O60701	UGDH	[K].ASVGFGGSCFQK.[D]	O60701 [268-279]	1xCarbamidomethyl [C9]		0	1244.57
277	O60701	UGDH	[R].VLIGGDETPEGQR.[A]	O60701 [178-190]			0	1370.69												-0.00903149				-0.943274															0.433318										-0.188101
278	Q9Y3D9	MRPS23	[K].SEHLSVRPQTALEENETQK.[E]	Q9Y3D9 [151-169]			0	2196.09
278	Q9Y3D9	MRPS23	[K].EVPQDQHLEAPADQSK.[G]	Q9Y3D9 [170-185]			0	1791.85							-0.502417	0.693267						-0.0769395										-0.328753							-0.0251498
279	I1E4Y6	GIGYF2	[K].EVESPYEVHDYIR.[A]	I1E4Y6 [1185-1197]			0	1635.76																						-0.153604
280	P50552	VASP	[R].VQIYHNPTANSFR.[V]	P50552 [36-48]			0	1546.78										0.0443439											0.361418																			-0.417725
280	P50552	VASP	[K].YNQATPNFHQWR.[D]	P50552 [72-83]			0	1561.73
280	P50552	VASP	[K].MQPDQQVVINCAIVR.[G]	P50552 [54-68]	1xCarbamidomethyl [C11]		0	1770.9
280	P50552	VASP	[K].EDAAQFAAGMASALEALEGGGPPPPPALPTWSVPNGPSPEEVEQQKR.[Q]	P50552 [97-143]			1	4781.32
281	Q14651	PLS1	[K].SISTSLPVLDLIDAIAPNAVR.[Q]	Q14651 [546-566]			0	2165.22					-0.0857704			0.125824			-0.00557043
281	Q14651; P13797	PLS1	[KR].QFVTPADVVSGNPK.[L]	Q14651 [349-362]; P13797 [351-364]			0	1458.76
281	Q14651; P13797	PLS1	[RK].AYFHLLNQIAPK.[G]	Q14651 [300-311]; P13797 [301-312]			0	1414.78																																					-0.144304
281	Q14651; P13797	PLS1	[K].LSPEELLLR.[W]	Q14651 [266-274]; P13797 [267-275]			0	1069.63																																					-0.0971422		-0.405399
282	P39019	RPS19	[K].ELAPYDENWFYTR.[A]	P39019 [44-56]			0	1703.77	-0.334469
282	P39019	RPS19	[K].DVNQQEFVR.[A]	P39019 [8-16]			0	1134.55
282	P39019	RPS19	[K].HKELAPYDENWFYTR.[A]	P39019 [42-56]			1	1968.92
282	P39019	RPS19	[R].NGVMPSHFSR.[G]	P39019 [85-94]	1xOxidation [M4]		0	1147.53																											-0.119908						0.222484
282	P39019	RPS19	[R].RVLQALEGLK.[M]	P39019 [102-111]			1	1126.69
282	P39019	RPS19	[R].NGVMPSHFSR.[G]	P39019 [85-94]			0	1131.54
282	P39019	RPS19	[K].LKVPEWVDTVK.[L]	P39019 [28-38]			1	1313.75	1.38958
282	P39019	RPS19	[K].VPEWVDTVK.[L]	P39019 [30-38]			0	1072.57	0.00450012
283	A0A1C7CYX9	DPYSL2	[K].IVLEDGTLHVTEGSGR.[Y]	A0A1C7CYX9 [557-572]			0	1682.87																																					0.487108	-0.104894	0.691741	0.366855	0.15844
283	A0A1C7CYX9	DPYSL2	[R].ILDLGITGPEGHVLSRPEEVEAEAVNR.[A]	A0A1C7CYX9 [317-343]			0	2900.51	0.00156573	0.248064
283	A0A1C7CYX9	DPYSL2	[K].GTVVYGEPITASLGTDGSHYWSK.[N]	A0A1C7CYX9 [376-398]			0	2425.17	-0.0147523
283	A0A1C7CYX9; Q14194	DPYSL2	[K].QIGENLIVPGGVK.[T]	A0A1C7CYX9 [149-161]; Q14194 [44-56]			0	1323.76
284	P27695	APEX1	[K].NDKEAAGEGPALYEDPPDQK.[T]	P27695 [33-52]			1	2143.98										0.0243461								0.898087
284	P27695	APEX1	[R].LDYFLLSHSLLPALCDSK.[I]	P27695 [282-299]	1xCarbamidomethyl [C15]		0	2092.08	-0.00381863																																							-0.394283
284	P27695	APEX1	[K].LPAELQELPGLSHQYWSAPSDKEGYSGVGLLSR.[Q]	P27695 [104-136]			1	3584.8								-0.653448																	-0.0314168	-0.0711793						-0.765549	-0.415299
284	P27695	APEX1	[K].LPAELQELPGLSHQYWSAPSDK.[E]	P27695 [104-125]			0	2466.23															0.213354
284	P27695	APEX1	[K].VSYGIGDEEHDQEGR.[V]	P27695 [142-156]			0	1690.73
284	P27695	APEX1	[R].QGFGELLQAVPLADSFR.[H]	P27695 [238-254]			0	1847.97	-0.13528			0.367157																																	0.0252202			-0.0158738
284	P27695	APEX1	[K].GAVAEDGDELRTEPEAK.[K]	P27695 [8-24]			1	1786.85
284	P27695	APEX1	[K].GLDWVKEEAPDILCLQETK.[C]	P27695 [80-98]	1xCarbamidomethyl [C14]		1	2244.12	-0.0569138
284	P27695	APEX1	[K].EGYSGVGLLSR.[Q]	P27695 [126-136]			0	1137.59
284	P27695	APEX1	[K].KGAVAEDGDELR.[T]	P27695 [7-18]			1	1259.62
284	P27695	APEX1	[K].KGLDWVKEEAPDILCLQETK.[C]	P27695 [79-98]	1xCarbamidomethyl [C15]		2	2372.22	-0.0938357			-0.657716					0.119536		-0.680933			-0.468729	-0.392133					0.543703	0.529743								0.6281	0.0471142
284	P27695	APEX1	[K].ICSWNVDGLR.[A]	P27695 [64-73]	1xCarbamidomethyl [C2]		0	1219.59	0.242401
284	P27695	APEX1	[R].KPLVLCGDLNVAHEEIDLR.[N]	P27695 [203-221]	1xCarbamidomethyl [C6]		0	2191.15
285	O75131	CPNE3	[R].SPDSLHYISPNGVNEYLTALWSVGLVIQDYDADK.[M]	O75131 [307-340]			0	3779.84
285	O75131	CPNE3	[K].TIELSDDDFLGECECTLGQIVSSK.[K]	O75131 [86-109]	2xCarbamidomethyl [C13; C15]		0	2716.23
285	O75131	CPNE3	[K].EALAQCVLAEIPQQVVGYFNTYK.[L]	O75131 [501-523]	1xCarbamidomethyl [C6]		0	2641.33																																		-0.0232685		-0.237624
285	O75131	CPNE3	[K].NNLNPVWRPFKISLNSLCYGDMDK.[T]	O75131 [185-208]	1xCarbamidomethyl [C18]		1	2881.41
285	O75131	CPNE3	[K].NNLNPVWRPFK.[I]	O75131 [185-195]			0	1384.75																																		-0.118214
286	P26583	HMGB2	[K].RPPSAFFLFCSEHRPK.[I]	P26583 [97-112]	1xCarbamidomethyl [C10]		0	1976
286	P26583	HMGB2	[K].SEHPGLSIGDTAK.[K]	P26583 [115-127]			0	1311.65
287	P09104; A0A2R8Y6G6	ENO2	[R].SGETEDTFIADLVVGLCTGQIK.[T]	P09104 [373-394]; A0A2R8Y6G6 [373-394]	1xCarbamidomethyl [C17]		0	2353.16	-0.0943184	0.0131038			-0.638904	-1.81852		0.302745																										-0.418898	0.0816355
287	P09104	ENO2	[R].YITGDQLGALYQDFVR.[D]	P09104 [270-285]			0	1858.93	0.0820547
287	P09104	ENO2	[K].DATNVGDEGGFAPNILENSEALELVK.[E]	P09104 [203-228]			0	2702.32														-0.0680589											0.26778		0.0723946
287	P09104; A0A2R8Y6G6	ENO2	[K].FGANAILGVSLAVCK.[A]	P09104 [106-120]; A0A2R8Y6G6 [106-120]	1xCarbamidomethyl [C14]		0	1519.83	0.155814
287	P09104; A0A2R8Y6G6	ENO2	[R].AAVPSGASTGIYEALELR.[D]	P09104 [33-50]; A0A2R8Y6G6 [33-50]			0	1804.94	-0.0440643	-1.54233					-1.39888						-2.21726	-1.70338	-1.66456				-1.75833	-1.38897			-0.701593					-0.918197		-0.0339251					-0.910537
287	P09104	ENO2	[K].LAQENGWGVMVSHR.[S]	P09104 [359-372]			0	1583.77
288	P61626	LYZ	[K].TPGAVNACHLSCSALLQDNIADAVACAK.[R]	P61626 [88-115]	3xCarbamidomethyl [C8; C12; C26]		0	2927.38	-0.234158																	-0.19529																						0.125069	-0.1227
288	P61626	LYZ	[R].STDYGIFQINSR.[Y]	P61626 [69-80]			0	1400.68
289	P27487	DPP4	[R].LNWATYLASTENIIVASFDGR.[G]	P27487 [561-581]			0	2341.18
289	P27487	DPP4	[R].LGTFEVEDQIEAAR.[Q]	P27487 [598-611]			0	1577.78					0.34503																	-0.0228296			0.339532	-0.287015	0.145756	0.310591	-0.139013			-0.0689464			-0.116787
290	P50395	GDI2	[K].SDIYVCMISFAHNVAAQGK.[Y]	P50395 [330-348]	1xCarbamidomethyl [C6]		0	2111																															-0.0603073
290	P50395	GDI2	[R].NPYYGGESASITPLEDLYK.[R]	P50395 [36-54]			0	2117.01	-0.0558447										-0.0388935																				-0.0845418	0.737077		-0.866672
290	P50395	GDI2	[K].VPSTEAEALASSLMGLFEK.[R]	P50395 [119-137]			0	1980	-0.0141879					-0.153333										0.232838			0.169741		1.0465					2.11609				0.607727	0.586908		0.445953		0.236724				-0.0846258
290	P50395	GDI2	[K].IYKVPSTEAEALASSLMGLFEK.[R]	P50395 [116-137]			1	2384.24												0.230841											-0.426471	-0.617019				0.09682		0.0646853	-0.339043		-0.297115		-0.137864
290	P50395	GDI2	[K].YIAIVSTTVETK.[E]	P50395 [349-360]			0	1324.74
290	P50395	GDI2	[R].TDDYLDQPCYETINR.[I]	P50395 [194-208]	1xCarbamidomethyl [C9]		0	1902.82	-0.0945588																														-0.160324
290	P50395	GDI2	[R].TYDATTHFETTCDDIK.[N]	P50395 [403-418]	1xCarbamidomethyl [C12]		0	1917.82
290	P50395	GDI2	[R].NPYYGGESASITPLEDLYKR.[F]	P50395 [36-55]			1	2273.11								1.3502	0.207065													-0.0322127															-0.144096
290	P50395	GDI2	[K].QLICDPSYVK.[D]	P50395 [279-288]	1xCarbamidomethyl [C4]		0	1222.61
290	P50395	GDI2	[K].FVSISDLLVPK.[D]	P50395 [380-390]			0	1217.71
290	P50395	GDI2	[K].FLVYVANFDEKDPR.[T]	P50395 [143-156]			1	1712.86																						-0.201962	-0.1023	-0.0709551						0.465519
290	P50395	GDI2	[K].DLGTESQIFISR.[T]	P50395 [391-402]			0	1365.7																													0.0107338	-0.163274
290	P50395	GDI2	[R].KSDIYVCMISFAHNVAAQGK.[Y]	P50395 [329-348]	1xCarbamidomethyl [C7]		1	2239.1	-0.00176871		0.0145848				0.335833
290	P50395	GDI2	[R].VICILSHPIK.[N]	P50395 [300-309]	1xCarbamidomethyl [C3]		0	1179.69
290	P50395	GDI2	[K].EPEKEIRPALELLEPIEQK.[F]	P50395 [361-379]			1	2261.24
290	P50395	GDI2	[K].EIRPALELLEPIEQK.[F]	P50395 [365-379]			0	1778.01
290	P50395	GDI2	[K].YIAIVSTTVETKEPEKEIRPALELLEPIEQK.[F]	P50395 [349-379]			2	3566.96
290	P50395	GDI2	[R].FKIPGSPPESMGR.[G]	P50395 [56-68]			1	1402.71
291	P10599	TXN	[K].MIKPFFHSLSEK.[Y]	P10599 [37-48]			0	1463.77																										-0.48429		-0.547611		-0.0724487	0.169991			-0.151616	-0.0735472	-0.0574525					-0.474832
291	P10599	TXN	[K].MIKPFFHSLSEK.[Y]	P10599 [37-48]	1xOxidation [M1]		0	1479.77								-0.142158																										-1.48627	-0.101421
291	P10599	TXN	[K].LVVVDFSATWCGPCK.[M]	P10599 [22-36]	2xCarbamidomethyl [C11; C14]		0	1738.83																																-0.496012	0.0590917	-0.311582	-0.137436	-0.152513	-0.0132516	0.0332366
291	P10599	TXN	[K].YSNVIFLEVDVDDCQDVASECEVK.[C]	P10599 [49-72]	2xCarbamidomethyl [C14; C21]		0	2833.25																																		0.724865	-0.107985
291	P10599	TXN	[K].TAFQEALDAAGDK.[L]	P10599 [9-21]			0	1336.64	-0.0122661																																	-0.184147	-0.187808	-0.204433	-0.231603	-0.251974	-0.220064	-0.126034	-0.185047
291	P10599	TXN	[K].CMPTFQFFK.[K]	P10599 [73-81]	1xCarbamidomethyl [C1]		0	1205.55																																		-0.026566	-0.0439953	-0.04118
291	P10599	TXN	[K].LEATINELV.[-]	P10599 [97-105]			0	1001.55
292	P61081	UBE2M	[K].TCDISFSDPDDLLNFK.[L]	P61081 [46-61]	1xCarbamidomethyl [C2]		0	1886.85																																-0.140068			-0.131119
292	P61081	UBE2M	[K].LVICPDEGFYK.[S]	P61081 [62-72]	1xCarbamidomethyl [C4]		0	1340.66																									-0.39604				0.00208885			-0.152592	-0.110967		-0.0617786
293	Q9NUQ9	FAM49B	[R].INNVPAEGENEVNNELANR.[M]	Q9NUQ9 [168-186]			0	2096																		-0.17925	-0.803899	-0.18137	-0.19189				-0.334914								-1.3679
293	Q9NUQ9	FAM49B	[K].DQPPNSVEGLLNALR.[Y]	Q9NUQ9 [290-304]			0	1622.85																					-0.102526
294	A2A274	ACO2	[K].IVYGHLDDPASQEIER.[G]	A2A274 [69-84]			0	1841.9						-0.158511				-0.572113	-1.02741																						-2.0998				-1.29022		0.0084187
294	A2A274	ACO2	[R].WVVIGDENYGEGSSR.[E]	A2A274 [682-696]			0	1667.77
294	A2A274	ACO2	[K].VAVPSTIHCDHLIEAQVGGEK.[D]	A2A274 [118-138]	1xCarbamidomethyl [C9]		0	2260.14																																						-0.646137	-0.469223
294	A2A274	ACO2	[R].NAVTQEFGPVPDTAR.[Y]	A2A274 [659-673]			0	1601.79
294	A2A274	ACO2	[K].FNPETDYLTGTDGK.[K]	A2A274 [532-545]			0	1557.71
294	A2A274	ACO2	[R].VGLIGSCTNSSYEDMGR.[S]	A2A274 [404-420]	1xCarbamidomethyl [C7]		0	1845.81																																						-0.127257	-0.0586733
295	P63146	UBE2B	[K].LVIEFSEEYPNKPPTVR.[F]	P63146 [55-71]			0	2018.06	-0.46464				-0.261148															-0.11952					0.447298	-0.663186	-0.349544	-0.95008	-1.04682	-0.0106981	-0.539541	0.290019	-1.182
296	Q5VWC4	PSMD4	[R].IIAFVGSPVEDNEK.[D]	Q5VWC4 [109-122]			0	1517.78								-0.225524																				-1.04796
296	Q5VWC4	PSMD4	[K].VNVDIINFGEEEVNTEK.[L]	Q5VWC4 [136-152]			0	1948.95		-0.303571		0.858743									0.571423																			0.406337
297	O14562	UBFD1	[K].LEQDQLWIGTK.[E]	O14562 [235-245]			0	1330.7
297	O14562	UBFD1	[R].LPTVPLSGMYNK.[S]	O14562 [213-224]			0	1319.7																																	-0.0897947
298	A0A0D9SG04	COBLL1	[K].TDDDVIGQAPAEASPPPIAPKPVTIPASQVSTQNLK.[T]	A0A0D9SG04 [1039-1074]			0	3652.91
298	A0A0D9SG04	COBLL1	[K].ETAIQTEDSAISESPEEPLPNLKPKPNLR.[T]	A0A0D9SG04 [880-908]			0	3203.64																																	-0.126203
299	Q15365	PCBP1	[R].LVVPATQCGSLIGK.[G]	Q15365 [102-115]	1xCarbamidomethyl [C8]		0	1442.8	-0.337483																							0.132965	0.320353	0.150743	-0.67187	0.383982	-0.879454	-0.72795	-0.378967
299	Q15365	PCBP1	[K].LEEDINSSMTNSTAASRPPVTLR.[L]	Q15365 [79-101]			0	2489.23
299	Q15365	PCBP1	[K].LEEDINSSMTNSTAASRPPVTLR.[L]	Q15365 [79-101]	1xOxidation [M9]		0	2505.22
299	Q15365	PCBP1	[R].IITLTGPTNAIFK.[A]	Q15365 [58-70]			0	1388.81	-0.00569999																								0.355344	0.318498	-0.610343	0.491342	-0.815636	-0.687787	-0.344741	-0.386352
299	Q15365	PCBP1	[R].CSDAAGYPHATHDLEGPPLDAYSIQGQHTISPLDLAK.[L]	Q15365 [201-237]	1xCarbamidomethyl [C1]		0	3945.87												-0.879233													-0.939216	-0.0325709	-0.39213	0.129209						-0.375435
299	Q15365	PCBP1	[R].AITIAGVPQSVTECVK.[Q]	Q15365 [145-160]	1xCarbamidomethyl [C14]		0	1672.89																											-0.692982	0.311558	-0.949172	-0.735998
299	Q15365	PCBP1	[R].QGANINEIR.[Q]	Q15365 [298-306]			0	1014.53
300	P27348	YWHAQ	[K].QTIDNSQGAYQEAFDISK.[K]	P27348 [140-157]			0	2014.94
300	P27348	YWHAQ	[R].SICTTVLELLDKYLIANATNPESK.[V]	P27348 [92-115]	1xCarbamidomethyl [C3]		1	2693.41	0.0189531	0.0850614
300	P27348	YWHAQ	[K].TAFDEAIAELDTLNEDSYK.[D]	P27348 [194-212]			0	2144.99
300	P27348	YWHAQ	[R].YLAEVACGDDRK.[Q]	P27348 [128-139]	1xCarbamidomethyl [C7]		1	1396.65
300	P27348	YWHAQ	[K].AVTEQGAELSNEER.[N]	P27348 [28-41]			0	1532.72
300	P27348	YWHAQ	[R].YLAEVACGDDR.[K]	P27348 [128-138]	1xCarbamidomethyl [C7]		0	1268.56
301	O75874	IDH1	[K].VTYLVHNFEEGGGVAMGMYNQDK.[S]	O75874 [165-187]			0	2559.16
301	O75874	IDH1	[R].LVSGWVKPIIIGR.[H]	O75874 [120-132]			0	1437.89	0.0666534																															-1.52173	-0.785675
301	O75874	IDH1	[K].LIFPYVELDLHSYDLGIENR.[D]	O75874 [30-49]			0	2406.23	0.00571656				-0.499747	-1.52528					-0.0583848	-0.395309						-0.684589				-0.173596			-0.000520071											-0.817687
301	O75874	IDH1	[K].SIEDFAHSSFQMALSK.[G]	O75874 [188-203]			0	1797.85																																		-0.269643
301	O75874	IDH1	[K].SIEDFAHSSFQMALSK.[G]	O75874 [188-203]	1xOxidation [M12]		0	1813.84																			-0.62207						-1.19312				-0.673341
301	O75874	IDH1	[R].SDYLNTFEFMDK.[L]	O75874 [389-400]			0	1509.66
301	O75874	IDH1	[R].SDYLNTFEFMDK.[L]	O75874 [389-400]	1xOxidation [M10]		0	1525.65
301	O75874	IDH1	[K].GQETSTNPIASIFAWTR.[G]	O75874 [322-338]			0	1878.93
301	O75874	IDH1	[R].FKDIFQEIYDK.[Q]	O75874 [223-233]			1	1445.73	0.0913775														-0.655319
301	O75874	IDH1	[R].ATDFVVPGPGK.[V]	O75874 [141-151]			0	1087.58	-0.0904856
301	O75874	IDH1	[K].DIFQEIYDK.[Q]	O75874 [225-233]			0	1170.57
301	O75874	IDH1	[K].SEGGFIWACK.[N]	O75874 [261-270]	1xCarbamidomethyl [C9]		0	1154.53	0.017101
301	O75874	IDH1	[R].HAYGDQYR.[A]	O75874 [133-140]			0	1009.45																											0.164807
302	P32322	PYCR1	[K].DNVSSPGGATIHALHVLESGGFR.[S]	P32322 [229-251]			0	2321.16	0.0831585														-2.03074							0.094266				0.00293532		-0.0210987			-0.551325						-0.615781			0.232314
302	P32322; J3KR12	PYCR1	[R].SLLINAVEASCIR.[T]	P32322 [252-264]; J3KR12 [178-190]	1xCarbamidomethyl [C11]		0	1445.78					-0.0548145								-0.0394353		-0.0232773																							0.345467
302	P32322	PYCR1	[R].EGATVYATGTHAQVEDGR.[L]	P32322 [130-147]			0	1861.87
302	P32322	PYCR1	[R].LGAQALLGAAK.[M]	P32322 [205-215]			0	1012.61
302	P32322	PYCR1	[K].GFTAAGVLAAHK.[I]	P32322 [18-29]			0	1142.63
302	P32322	PYCR1	[K].LDSPAGTALSPSGHTK.[L]	P32322 [292-307]			0	1538.78															-0.176371	0.107977					0.606687			0.0622401									1.34955
302	P32322	PYCR1	[K].MLLHSEQHPGQLK.[D]	P32322 [216-228]	1xOxidation [M1]		0	1533.78
302	P32322	PYCR1	[K].IMASSPDMDLATVSALR.[KL]	P32322 [30-46]			0	1777.88	-0.154146
303	K7EPC6	ZNF283	[-].MCLITLNNSYRMFESCSGFSGFCASPIEESHGALISSCNSR.[T]	K7EPC6 [1-41]	4xCarbamidomethyl [C2; C16; C23; C38]; 2xOxidation [M1; M12]		1	4709.03		-0.236227	-0.213002											-0.150702																		-0.489974		0.0671991
304	P00491	PNP	[K].LEQFVSILMASIPLPDK.[A]	P00491 [271-287]			0	1901.05			0.131702						0.0978789																					-0.104419		-0.227674								-0.290616	-0.295874
304	P00491	PNP	[K].NTAEWLLSHTK.[H]	P00491 [12-22]			0	1299.67																																					-0.0335347	-0.0678004		-0.0485674	-0.773523
305	O60547	GMDS	[K].IYLGQLECFSLGNLDAK.[R]	O60547 [230-246]	1xCarbamidomethyl [C8]		0	1940.98	0.00740415
305	O60547	GMDS	[K].IINEVKPTEIYNLGAQSHVK.[I]	O60547 [96-115]			0	2253.22
305	O60547	GMDS	[K].YYRPTEVDFLQGDCTK.[A]	O60547 [323-338]	1xCarbamidomethyl [C14]		0	1991.92
306	Q495X7	TRIM60	[R].QIQDEEMNILAKLNENLVELSDYVSTLK.[H]	Q495X7 [204-231]			1	3249.66																																-0.11801
307	P00492	HPRT1	[R].SPGVVISDDEPGYDLDLFCIPNHYAEDLER.[V]	P00492 [5-34]	1xCarbamidomethyl [C19]		0	3435.57	-0.246166
307	P00492	HPRT1	[K].VIGGDDLSTLTGK.[N]	P00492 [116-128]			0	1275.68	-0.395542																								-0.168991							-0.279409			-0.0938301
308	O00754	MAN2B1	[R].LQETTLVANQLR.[E]	O00754 [951-962]			0	1385.77
308	O00754	MAN2B1	[K].ELVDYFLNVATAQGR.[Y]	O00754 [291-305]			0	1695.87
308	O00754	MAN2B1	[R].LPVSEGVFVVK.[D]	O00754 [528-538]			0	1173.69																													-0.0496106	-0.07033		-0.0761089	0.0203106
308	O00754	MAN2B1	[R].LEHQFAVGEDSGR.[N]	O00754 [917-929]			0	1444.68
309	P36578	RPL4	[K].APIRPDIVNFVHTNLRK.[N]	P36578 [30-46]			1	1990.13																													-0.175129	-0.150679		-0.295289	-0.205887		-0.0354269
310	P01034	CST3	[K].TQPNLDNCPFHDQPHLK.[R]	P01034 [102-118]	1xCarbamidomethyl [C8]		0	2060.96																													-0.144534			-0.148825	-0.186029		-0.203447
310	P01034	CST3	[K].ASNDMYHSR.[A]	P01034 [63-71]			0	1080.45
311	P28074	PSMB5	[R].GYSYDLEVEQAYDLAR.[R]	P28074 [201-216]			0	1891.87																																-1.08855
311	P28074	PSMB5	[R].DAYSGGAVNLYHVR.[E]	P28074 [226-239]			0	1521.74
311	P28074	PSMB5	[R].VSSDNVADLHEK.[Y]	P28074 [246-257]			0	1313.63
311	P28074	PSMB5	[K].LLANMVYQYK.[G]	P28074 [141-150]			0	1242.66
312	P09429	HMGB1	[K].IKGEHPGLSIGDVAK.[K]	P09429 [113-127]			1	1520.84	-0.0319228																						0.992714						-0.321093	-0.213821	-1.04447	-1.81406			-0.300583
312	P09429	HMGB1	[K].RPPSAFFLFCSEYRPK.[I]	P09429 [97-112]	1xCarbamidomethyl [C10]		0	2002
312	P09429	HMGB1	[K].GEHPGLSIGDVAK.[K]	P09429 [115-127]			0	1279.66								1.33794																			2.6168									1.12767
312	P09429	HMGB1	[K].KHPDASVNFSEFSK.[K]	P09429 [30-43]			1	1592.77	-0.262598					0.306322					0.155227	0.218779												0.32966	-1.33932										-0.14417
313	O60884	DNAJA2	[K].LYDILGVPPGASENELKK.[A]	O60884 [9-26]			1	1943.05																					0.0580882								-0.29413
313	O60884	DNAJA2	[K].EISFAYEVLSNPEK.[R]	O60884 [49-62]			0	1625.81																													-0.32159
313	O60884	DNAJA2	[K].EISFAYEVLSNPEKR.[E]	O60884 [49-63]			1	1781.91
313	O60884	DNAJA2	[K].EYHPDKNPNAGDKFK.[E]	O60884 [34-48]			2	1759.84																													-0.382127											-0.752426	0.21041
313	O60884	DNAJA2	[K].LYDILGVPPGASENELK.[K]	O60884 [9-25]			0	1814.95																													-0.412099
314	O00425	IGF2BP3	[K].IELHGKPIEVEHSVPK.[R]	O00425 [61-76]			0	1812
314	O00425	IGF2BP3	[K].LYIGNLSENAAPSDLESIFK.[D]	O00425 [4-23]			0	2181.11	-0.0564009
314	O00425	IGF2BP3	[K].VAYIPDEMAAQQNPLQQPR.[G]	O00425 [151-169]			0	2169.08
314	O00425	IGF2BP3	[K].IPVSGPFLVK.[T]	O00425 [27-36]			0	1056.65																													-0.294489	-0.752078
314	O00425	IGF2BP3	[K].LNGFQLENFTLK.[V]	O00425 [139-150]			0	1423.76
314	O00425	IGF2BP3	[K].VAYIPDEMAAQQNPLQQPR.[G]	O00425 [151-169]	1xOxidation [M8]		0	2185.07
314	O00425	IGF2BP3	[K].TGYAFVDCPDESWALK.[A]	O00425 [37-52]	1xCarbamidomethyl [C8]		0	1858.83
315	Q14203	DCTN1	[K].YFTCDEGHGIFVR.[Q]	Q14203 [78-90]	1xCarbamidomethyl [C4]		0	1600.72																														-0.404748		-0.377416
316	P49790	NUP153	[R].FVASKPLEEEEMEVPVLPK.[I]	P49790 [456-474]	1xOxidation [M12]		0	2187.13																														-0.341788
317	Q8TD30	GPT2	[K].VLCIINPGNPTGQVQSR.[K]	Q8TD30 [263-279]	1xCarbamidomethyl [C3]		0	1852.97
317	Q8TD30	GPT2	[RK].LLEETGICVVPGSGFGQR.[E]	Q8TD30 [470-487]	1xCarbamidomethyl [C8]		0	1918.97
317	Q8TD30	GPT2	[R].DGGVPADPDNIYLTTGASDGISTILK.[I]	Q8TD30 [171-196]			0	2590.29																									0.0106929					-0.0403959
318	Q15274	QPRT	[R].EDCPGLNYAALVSGAGPSQAALWAK.[S]	Q15274 [25-49]	1xCarbamidomethyl [C3]		0	2546.23	-1.63524					0.514866																			-0.184979		-0.311773		-0.253617	-0.107765	-0.262616			-0.422178						-0.695443	-0.12691
318	Q15274	QPRT	[K].VEVECSSLQEAVQAAEAGADLVLLDNFKPEELHPTATVLK.[A]	Q15274 [198-237]	1xCarbamidomethyl [C5]		0	4321.19	-0.0637156	-0.160783	-0.163152																								-0.26246	-0.218701	-0.278568	-0.196613	-0.213814		-0.187474	-0.702946	-0.529591
318	Q15274	QPRT	[R].CSGIASAAAAAVEAAR.[G]	Q15274 [111-126]	1xCarbamidomethyl [C1]		0	1475.73
318	Q15274	QPRT	[K].YGLLVGGAASHR.[Y]	Q15274 [150-161]			0	1200.65																											-1.62339	-0.0946693	-0.0781284	-0.0738245	-0.0835202	-0.0890618	0.865432		-0.158429
318	Q15274	QPRT	[R].GAGWTGHVAGTR.[K]	Q15274 [127-138]			0	1169.58				-0.570741						-0.627107									-0.277985	-0.868074			0.133476					-0.121998	-0.281361	-0.0459042	-0.0938359	-0.215348			-0.107315	-1.68123				-1.14378
318	Q15274	QPRT	[R].GAGWTGHVAGTRK.[T]	Q15274 [127-139]			1	1297.68						-0.8826	-1.0129																				-0.0730606	-0.258713	0.0807103	0.0601909	-0.039783	-0.176701				-2.01256
318	Q15274	QPRT	[R].GPAHCLLLGER.[V]	Q15274 [92-102]	1xCarbamidomethyl [C5]		0	1222.64
318	Q15274	QPRT	[K].DNHVVAAGGVEK.[A]	Q15274 [172-183]			0	1195.61
318	Q15274	QPRT	[R].YDLGGLVMVK.[D]	Q15274 [162-171]	1xOxidation [M8]		0	1110.59																											-0.219016			-0.52278
319	O15067	PFAS	[R].NPSTVEAFDLAQSNSEHSR.[H]	O15067 [213-231]			0	2088.96																									-0.125857	-0.20926		-0.164971		-0.134983
319	O15067	PFAS	[R].LNFSTPTSTNIVSVCR.[A]	O15067 [94-109]	1xCarbamidomethyl [C15]		0	1795.9																										-0.140405		0.0611809	-0.109804	-0.0639913	-0.13926
319	O15067	PFAS	[K].ELSDPAGAIIYTSR.[F]	O15067 [528-541]			0	1492.76
319	O15067	PFAS	[R].ESWLLPGSNDLLLEVGPR.[L]	O15067 [76-93]			0	1995.05
319	O15067	PFAS	[K].GWAAAVTFHPR.[A]	O15067 [1128-1138]			0	1212.63																									-0.1171	-0.12915	-0.104549	-0.0791329			0.168764
319	O15067	PFAS	[R].LGGTALAQCFSQLGEHPPDLDLPENLVR.[A]	O15067 [863-890]	1xCarbamidomethyl [C9]		0	3047.53
319	O15067	PFAS	[R].SVGGLVAQQQCVGPLQTPLADVAVVALSHEELIGAATALGEQPVK.[S]	O15067 [687-731]	1xCarbamidomethyl [C11]		0	4521.4																												-0.225646
319	O15067	PFAS	[R].NGQGDAPPTPLPTPVDLELEWVLGK.[M]	O15067 [611-635]			0	2643.37											0.0294157															-0.258162		-0.130687
320	P52597	HNRNPF	[K].HSGPNSADSANDGFVR.[L]	P52597 [99-114]			0	1630.72																						-0.310286		-0.498938	-0.254495				-0.191696
320	P52597	HNRNPF	[K].ITGEAFVQFASQELAEK.[A]	P52597 [151-167]			0	1867.94	0.00770415																							0.0544243		-0.135662	0.0407925	-0.0888423	-0.129844	-0.0034873
320	P52597; G8JLB6	HNRNPF	[RK].ATENDIYNFFSPLNPVR.[V]	P52597 [300-316]; G8JLB6 [300-316]			0	1996.98	-0.0277343											-0.138077		-0.252557				-0.153344			0.405281		-0.242487	0.0216044		-0.175426	-0.0572784	-0.0916063	-0.0377187	0.0521131	-0.0666018	-0.0712616	-0.0552669		-0.0377491
320	P52597; G8JLB6; P55795	HNRNPF	[R].VHIEIGPDGR.[V]	P52597 [317-326]; G8JLB6 [317-326]; P55795 [317-326]			0	1092.58								-0.167017				-0.237069		0.488499						0.152693											-0.148919	-0.0790861	-0.0467268
320	P52597	HNRNPF	[R].QSGEAFVELGSEDDVK.[M]	P52597 [53-68]			0	1709.79
320	P52597	HNRNPF	[R].GLPWSCSVEDVQNFLSDCTIHDGAAGVHFIYTR.[E]	P52597 [17-49]	2xCarbamidomethyl [C6; C18]		0	3751.73																										-0.188147
320	P52597	HNRNPF	[K].EEIVQFFSGLEIVPNGITLPVDPEGK.[I]	P52597 [125-150]			0	2827.48						0.466484					-0.516646	0.508172											-0.210494	-0.000459084		-0.208852		-0.140719	-0.178677	-0.244125	-0.119422	-0.272844	0.404461					0.00269218
320	P52597	HNRNPF	[R].TEMDWVLK.[-H]	P52597 [91-98]			0	1021.5																										-0.145817
320	P52597	HNRNPF	[R].GLPFGCTKEEIVQFFSGLEIVPNGITLPVDPEGK.[I]	P52597 [117-150]	1xCarbamidomethyl [C6]		1	3687.9	-0.240551																									-0.0560862
321	Q6UWP2	DHRS11	[R].LALVTGASGGIGAAVAR.[A]	Q6UWP2 [13-29]			0	1483.86																																-0.155314
321	Q6UWP2	DHRS11	[K].YAVTALTEGLR.[Q]	Q6UWP2 [171-181]			0	1193.65
321	Q6UWP2	DHRS11	[R].TVGNIEELAAECK.[S]	Q6UWP2 [44-56]	1xCarbamidomethyl [C12]		0	1433.69																																-0.308487
321	Q6UWP2	DHRS11	[R].VLPLSVTHFYSATK.[Y]	Q6UWP2 [157-170]			0	1562.86																													-0.00149318	-0.0311304		-0.0775519
321	Q6UWP2	DHRS11	[R].ATCISPGVVETQFAFK.[L]	Q6UWP2 [193-208]	1xCarbamidomethyl [C3]		0	1754.88
322	Q63HM1	AFMID	[R].VLVVVGQFDSPEFHR.[Q]	Q63HM1 [239-253]			0	1728.91	-0.293578																								-0.240532	-0.0543311
323	Q9UNZ2	NSFL1C	[R].DLIHDQDEDEEEEEGQR.[FG]	Q9UNZ2 [77-93]			0	2085.85
323	Q9UNZ2	NSFL1C	[R].LGAAPEEESAYVAGEK.[R]	Q9UNZ2 [157-172]			0	1620.78
323	Q9UNZ2	NSFL1C	[K].LGSTAPQVLSTSSPAQQAENEAK.[A]	Q9UNZ2 [260-282]			0	2314.15								0.810878		0.702045										-0.166731
323	Q9UNZ2	NSFL1C	[K].ASSSILIDESEPTTNIQIR.[L]	Q9UNZ2 [283-301]			0	2074.07																		-0.124507		-0.135219	-0.100612		0.511307	0.126299											-1.4761			-0.487999
323	Q9UNZ2	NSFL1C	[R].EFVAVTGAEEDR.[A]	Q9UNZ2 [11-22]			0	1322.62
323	Q9UNZ2	NSFL1C	[K].KSPNELVDDLFK.[G]	Q9UNZ2 [113-124]			1	1404.74																													-0.164685	-0.601129
323	Q9UNZ2	NSFL1C	[R].SGQQIVGPPRK.[K]	Q9UNZ2 [102-112]			1	1166.66																		-0.034791		0.800371									0.000624538	-0.585049
323	Q9UNZ2	NSFL1C	[K].SGFSLDNGELR.[S]	Q9UNZ2 [189-199]			0	1194.57															-0.116674		-0.459647			-0.252715					-0.14579					-0.348888			-0.0404802
323	Q9UNZ2	NSFL1C	[K].EANLLNAVIVQR.[L]	Q9UNZ2 [357-368]			0	1339.77								-0.0497262												-0.0834232
323	Q9UNZ2	NSFL1C	[R].SGQQIVGPPR.[K]	Q9UNZ2 [102-111]			0	1038.57
323	Q9UNZ2	NSFL1C	[R].LAHGGQVNLDMEDHRDEDFVKPK.[G]	Q9UNZ2 [225-247]	1xOxidation [M11]		1	2666.26
324	P28482; P27361	MAPK1	[K].ISPFEHQTYCQR.[T]	P28482 [56-67]; P27361 [73-84]	1xCarbamidomethyl [C10]		0	1565.72
324	P28482	MAPK1	[K].LKELIFEETAR.[F]	P28482 [343-353]			1	1348.75	0.26792																-0.319673																						1.20658
324	P28482	MAPK1	[R].YTNLSYIGEGAYGMVCSAYDNVNK.[V]	P28482 [25-48]	1xCarbamidomethyl [C16]		0	2689.19
324	P28482	MAPK1	[R].VADPDHDHTGFLTEYVATR.[W]	P28482 [173-191]			0	2144
324	P28482	MAPK1	[R].NYLLSLPHK.[N]	P28482 [262-270]			0	1084.61
324	P28482	MAPK1	[K].RIEVEQALAHPYLEQYYDPSDEPIAEAPFK.[F]	P28482 [301-330]			1	3518.71
324	P28482	MAPK1	[K].ELIFEETAR.[F]	P28482 [345-353]			0	1107.57
324	P28482; P27361	MAPK1	[R].DLKPSNLLLNTTCDLK.[IG]	P28482 [149-164]; P27361 [166-181]	1xCarbamidomethyl [C13]		0	1844.98						-0.42638																																			0.195082
325	Q92530	PSMF1	[R].IVSGIITPIHEQWEK.[A]	Q92530 [134-148]			0	1749.95																							0.033658
326	P07686	HEXB	[R].VLPEFDTPGHTLSWGK.[G]	P07686 [285-300]			0	1783.9																														-0.101497	-0.21665		0.188918
326	P07686	HEXB	[R].GIAAQPLYAGYCNHENM.[-]	P07686 [540-556]	1xCarbamidomethyl [C12]; 1xOxidation [M17]		0	1924.83
326	P07686	HEXB	[K].VEPLDFGGTQK.[Q]	P07686 [466-476]			0	1190.61
326	P07686	HEXB	[K].GSYSLSHVYTPNDVR.[M]	P07686 [258-272]			0	1694.81																							1.36736						-0.285308	-0.152997		-0.0085614								0.216309
326	P07686	HEXB	[K].LAPGTIVEVWK.[D]	P07686 [415-425]			0	1212.7
327	Q8NEN9	PDZD8	[K].LEFMLDKLQNEIDQELEHNNSLVREEK.[E]	Q8NEN9 [1036-1062]	1xOxidation [M4]		2	3329.63															-0.165823								0.882182			0.0819816
328	Q8NBS9	TXNDC5	[K].ALAPTWEQLALGLEHSETVK.[I]	Q8NBS9 [222-241]			0	2193.16																					0.366646
328	Q8NBS9	TXNDC5	[K].VDCTAHSDVCSAQGVR.[G]	Q8NBS9 [119-134]	2xCarbamidomethyl [C3; C10]		0	1761.76
328	Q8NBS9	TXNDC5	[K].VDCTQHYELCSGNQVR.[G]	Q8NBS9 [245-260]	2xCarbamidomethyl [C3; C10]		0	1965.85								0.498595																											0.0461184
328	Q8NBS9	TXNDC5	[K].QGLYELSASNFELHVAQGDHFIK.[F]	Q8NBS9 [189-211]			0	2603.29
328	Q8NBS9	TXNDC5	[K].GTVLALTENNFDDTIAEGITFIK.[F]	Q8NBS9 [322-344]			0	2482.27
328	Q8NBS9	TXNDC5	[R].TETGATETVTPSEAPVLAAEPEADKGTVLALTENNFDDTIAEGITFIK.[F]	Q8NBS9 [297-344]			1	4977.46
328	Q8NBS9	TXNDC5	[R].EYVESQLQR.[T]	Q8NBS9 [288-296]			0	1151.57
328	Q8NBS9	TXNDC5	[K].LFKPGQEAVK.[Y]	Q8NBS9 [141-150]			0	1116.64																					-0.0709788															-0.698277
328	Q8NBS9	TXNDC5	[K].KEFPGLAGVK.[I]	Q8NBS9 [366-375]			1	1045.6																													0.0557973	0.0504661
328	Q8NBS9	TXNDC5	[R].DFQTLENWMLQTLNEEPVTPEPEVEPPSAPELK.[Q]	Q8NBS9 [156-188]			0	3807.83
328	Q8NBS9	TXNDC5	[R].FVLSQAKDEL.[-]	Q8NBS9 [423-432]			1	1149.62																																									1.08611
329	P15559	NQO1	[R].ALIVLAHSER.[T]	P15559 [6-15]			0	1108.65	0.0455868																																								-0.0246994
329	P15559	NQO1	[K].FGLSVGHHLGK.[S]	P15559 [252-262]			0	1151.63	-0.976583																												-0.351158						0.952724						-0.123286
329	P15559	NQO1	[K].LKDPANFQYPAESVLAYK.[E]	P15559 [60-77]			1	2054.06	-0.0437802	0.338257					0.525544	0.479208																												0.377002			0.0575275
329	P15559	NQO1	[K].EGHLSPDIVAEQK.[K]	P15559 [78-90]			0	1422.72																				0.066741									0.25097												-0.153971
330	P62249	RPS16	[K].GPLQSVQVFGR.[K]	P62249 [5-15]			0	1187.65
330	P62249	RPS16	[K].GGGHVAQIYAIR.[Q]	P62249 [74-85]			0	1241.67
330	P62249	RPS16	[K].VNGRPLEMIEPR.[T]	P62249 [34-45]	1xOxidation [M8]		0	1426.75																			-0.606042		-0.575342
330	P62249	RPS16	[K].DILIQYDR.[T]	P62249 [110-117]			0	1035.55
330	P62249	RPS16	[K].VNGRPLEMIEPR.[T]	P62249 [34-45]			0	1410.75
330	P62249	RPS16	[-K].LLEPVLLLGK.[E]	P62249 [51-60]			0	1094.72	-0.0931641
331	P17096	HMGA1	[K].KLEKEEEEGISQESSEEEQ.[-]	P17096 [89-107]			2	2236.99
331	P17096	HMGA1	[R].KQPPVSPGTALVGSQK.[E]	P17096 [31-46]			1	1593.9
332	B0YIW6	ARCN1	[R].RNTLEWCLPVIDAK.[N]	B0YIW6 [476-489]	1xCarbamidomethyl [C7]		1	1714.89																																				0.243213
332	B0YIW6	ARCN1	[R].FSTETTFLVDK.[Y]	B0YIW6 [538-548]			0	1287.65
332	B0YIW6	ARCN1	[K].LFTAESLIGLK.[N]	B0YIW6 [378-388]			0	1191.7
332	B0YIW6	ARCN1	[K].NYCNIQVTK.[V]	B0YIW6 [518-526]	1xCarbamidomethyl [C3]		0	1139.55
332	B0YIW6	ARCN1	[K].SFPVNSDVGVLK.[W]	B0YIW6 [393-404]			0	1261.68
333	P21266	GSTM3	[K].LKPQYLEELPGQLK.[Q]	P21266 [127-140]			0	1655.94
333	P21266	GSTM3	[K].IAAYLQSDQFCK.[M]	P21266 [198-209]	1xCarbamidomethyl [C11]		0	1443.69
333	P21266	GSTM3	[K].LDLDFPNLPYLLDGK.[N]	P21266 [57-71]			0	1732.92																													-0.16001		-0.146276
334	P54727	RAD23B	[K].NFVVVMVTKPK.[A]	P54727 [68-78]			0	1261.73	0.43722										0.0356241	-0.026374	-0.28946	-0.179929	-0.0372105	-0.0897679														-0.106907	-0.203725
334	P54727	RAD23B	[K].QEKPAEKPAETPVATSPTATDSTSGDSSR.[S]	P54727 [145-173]			0	2945.4
334	P54727	RAD23B	[R].ESQAVVDPPQAASTGAPQSSAVAAAAATTTATTTTTSSGGHPLEFLR.[N]	P54727 [234-280]			0	4512.21
334	P54727	RAD23B	[K].ILNDDTALK.[E]	P54727 [52-60]			0	1002.55
334	P54727	RAD23B	[K].IDIDPEETVK.[A]	P54727 [15-24]			0	1158.59
335	P36871	PGM1	[K].FNISNGGPAPEAITDK.[I]	P36871 [131-146]			0	1630.81																			0.298115		-0.184753					-0.364309					-0.226245		-0.213766
335	P36871	PGM1	[R].SIFDFSALKELLSGPNR.[L]	P36871 [201-217]			1	1894.01	-0.012933	0.116949																			-0.0684518												-0.192984
335	P36871	PGM1	[K].SGEHDFGAAFDGDGDR.[N]	P36871 [278-293]			0	1652.66																					-0.167274				-0.160782								-0.151205
335	P36871	PGM1	[K].ILCEELGAPANSAVNCVPLEDFGGHHPDPNLTYAADLVETMK.[S]	P36871 [236-277]	2xCarbamidomethyl [C3; C16]		0	4565.14																					-0.160562
335	P36871	PGM1	[R].LVIGQNGILSTPAVSCIIR.[K]	P36871 [86-104]	1xCarbamidomethyl [C16]		0	2011.14																					-0.00511341
335	P36871	PGM1	[K].LSLCGEESFGTGSDHIR.[E]	P36871 [371-387]	1xCarbamidomethyl [C4]		0	1864.85																					-0.0547373					0.0247917						-0.151035	-0.122881
335	P36871	PGM1	[K].INQDPQVMLAPLISIALK.[V]	P36871 [528-545]			0	1964.12	0.0126669																				-0.0627804							-0.0824966	-0.0994739	0.291657		-0.283715	-0.138936
335	P36871	PGM1	[K].INQDPQVMLAPLISIALK.[V]	P36871 [528-545]	1xOxidation [M8]		0	1980.12																					-0.143926
335	P36871	PGM1	[K].ADNFEYSDPVDGSISR.[N]	P36871 [471-486]			0	1771.78																					-0.152416				-0.196304	-0.14708							-0.18716
335	P36871	PGM1	[R].YDYEEVEAEGANK.[M]	P36871 [428-440]			0	1516.64
335	P36871	PGM1	[K].VFQSSANYAENFIQSIISTVEPAQR.[Q]	P36871 [28-52]			0	2799.39													-0.42081								-0.40144												-0.268381
335	P36871	PGM1	[K].TQAYQDQKPGTSGLR.[K]	P36871 [9-23]			0	1649.82															-0.0999164						-0.180514		0.152063	-1.1255	-0.790949										0.0204181	-0.517742				-1.18438
335	P36871	PGM1	[K].TIEEYAVCPDLK.[V]	P36871 [153-164]	1xCarbamidomethyl [C8]		0	1437.69	0.0412872										-0.5176									-0.176803	-0.139021					-0.331724							-0.127285
335	P36871	PGM1	[K].DLEALMFDR.[S]	P36871 [444-452]			0	1109.53																					-0.0873959
335	P36871	PGM1	[R].IDAMHGVVGPYVK.[K]	P36871 [222-234]			0	1385.72	-1.17884																		1.60237		-0.0552561			0.0920936		-0.523043			0.0874644						-1.19194						0.339663
335	P36871	PGM1	[K].IALYETPTGWK.[F]	P36871 [350-360]			0	1278.67																					-0.0969902						-0.0426134						-0.131925
335	P36871	PGM1	[K].HGFFVNPSDSVAVIAANIFSIPYFQQTGVR.[G]	P36871 [300-329]			0	3281.67
335	P36871	PGM1	[K].FFGNLMDASK.[L]	P36871 [361-370]			0	1129.53																					-0.133683
336	A0A024R6X1	CES2	[R].APVYFYEFQHQPSWLK.[N]	A0A024R6X1 [495-510]			0	2040
336	A0A024R6X1	CES2	[K].ADHGDELPFVFR.[S]	A0A024R6X1 [519-530]			0	1402.67
337	A0A0C4DFZ2	ARSA	[K].DPGENYNLLGGVAGATPEVLQALK.[Q]	A0A0C4DFZ2 [436-459]			0	2426.26																							0.0352441	0.0695669	-0.163213	0.0342138		-0.0661962											1.0289
338	P15531; Q32Q12	NME1	[R].VMLGETNPADSKPGTIR.[G]	P15531 [89-105]; Q32Q12 [114-130]; [229-245]			0	1785.92	0.00270938																				0.0188965			-0.412791	-0.167545	-0.117175	-0.0927108	-0.200334	-0.141398	-0.106444	-0.173445	-0.183663	-0.0752478		-0.0844712	-0.0154415
338	P15531; Q32Q12	NME1	[R].VMLGETNPADSKPGTIR.[G]	P15531 [89-105]; Q32Q12 [114-130]; [229-245]	1xOxidation [M2]		0	1801.91																				0.487654	0.42166			-0.577929			-0.474624	-0.050062	-0.201975	-0.138222	-0.19313		-0.658777		-0.120307	-0.126344			-0.340466		-0.149266
338	P15531	NME1	[R].NIIHGSDSVESAEK.[E]	P15531 [115-128]			0	1485.72																													-0.328525	-0.720392	-0.525593				-0.436322					0.48003
338	P15531; Q32Q12	NME1	[R].GDFCIQVGR.[NT-]	P15531 [106-114]; Q32Q12 [131-139]; [246-254]	1xCarbamidomethyl [C4]		0	1051.5																									-0.034721	-0.043961				-0.114513	-0.0757099				-0.111134	-0.0197574		-0.0036018		-0.0867245	-0.13996
338	P15531; Q32Q12	NME1	[K].FMQASEDLLK.[E]	P15531 [40-49]; Q32Q12 [65-74]			0	1181.59
338	P15531; Q32Q12	NME1	[K].FMQASEDLLK.[E]	P15531 [40-49]; Q32Q12 [65-74]	1xOxidation [M2]		0	1197.58																														-0.0804378	-0.0619579				-0.897464
338	P15531; Q32Q12	NME1	[R].TFIAIKPDGVQR.[G]	P15531 [7-18]; Q32Q12 [32-43]; [147-158]			0	1344.76	-0.549865																				-0.048867			-0.113987	-0.101384		-0.0733353	-0.0785903	-0.0584932	-0.0699564	-0.0666696	-0.0303072	-0.0148777	-0.0944037	-0.0647322	-0.076688	-0.0365863	-0.112089		-0.0442135	-0.0700517
338	P15531; Q32Q12	NME1	[K].DRPFFAGLVK.[Y]	P15531 [57-66]; Q32Q12 [82-91]			0	1149.64	-0.0133052																																								-0.0658629
339	Q13884	SNTB1	[R].TAFTDLPEQVPESISNQK.[R]	Q13884 [93-110]			0	2003.99																													0.0224128
340	E7EQR4	EZR	[K].FYPEDVAEELIQDITQK.[L]	E7EQR4 [84-100]			0	2038	-0.00556406																									-0.259452
340	E7EQR4	EZR	[R].QLLTLSSELSQAR.[D]	E7EQR4 [530-542]			0	1445.8
340	E7EQR4	EZR	[K].RAQEEAERLEADR.[M]	E7EQR4 [381-393]			2	1572.77
340	E7EQR4	EZR	[R].IQVWHAEHR.[G]	E7EQR4 [172-180]			0	1175.61
341	P07099	EPHX1	[K].NHGLSDEHVFEVICPSIPGYGFSEASSK.[K]	P07099 [169-196]	1xCarbamidomethyl [C14]		0	3063.42	-0.209632	-0.0601645	0.0594195	-0.0857258				0.0276087
341	P07099	EPHX1	[R].GGHFAAFEEPELLAQDIR.[K]	P07099 [429-446]			0	1999.99	-0.0646043				-0.228707		0.0576324					0.352339			0.217639		-0.0394195																			0.466105
341	P07099	EPHX1	[K].VYVPTGFSAFPFELLHTPEK.[W]	P07099 [392-411]			0	2279.17
342	Q7KZF4	SND1	[R].SEAVVEYVFSGSR.[L]	Q7KZF4 [527-539]			0	1429.7
342	Q7KZF4	SND1	[R].NLPGLVQEGEPFSEEATLFTK.[E]	Q7KZF4 [566-586]			0	2306.16	-0.09498																																								-0.422184
342	Q7KZF4	SND1	[R].VLPAQATEYAFAFIQVPQDDDAR.[T]	Q7KZF4 [788-810]			0	2565.26
342	Q7KZF4	SND1	[R].NDIASHPPVEGSYAPR.[R]	Q7KZF4 [716-731]			0	1709.82	0.0467127																							0.594288	-1.51434			0.13378
342	Q7KZF4	SND1	[R].SSHYDELLAAEAR.[A]	Q7KZF4 [473-485]			0	1461.7
342	Q7KZF4	SND1	[R].SASYKPVFVTEITDDLHFYVQDVETGTQLEK.[L]	Q7KZF4 [679-709]			0	3559.75																															-0.192573
342	Q7KZF4	SND1	[R].DIQNTQCLLNVEHLSAGCPHVTLQFADSK.[G]	Q7KZF4 [820-848]	2xCarbamidomethyl [C7; C18]		0	3295.58
342	Q7KZF4	SND1	[K].ETCLITFLLAGIECPR.[G]	Q7KZF4 [547-562]	2xCarbamidomethyl [C3; C14]		0	1892.96		-0.12974
342	Q7KZF4	SND1	[R].LGTLSPAFSTR.[V]	Q7KZF4 [777-787]			0	1149.63
343	P12814	ACTN1	[K].IDQLEGDHQLIQEALIFDNK.[H]	P12814 [685-704]			0	2339.19	-0.0853255
343	P12814; O43707	ACTN1	[K].CQLEINFNTLQTK.[L]	P12814 [332-344]; O43707 [351-363]	1xCarbamidomethyl [C1]		0	1608.81																			-0.198141								-0.136607									0.900152
343	P12814; O43707	ACTN1	[R].ELPPDQAEYCIAR.[M]	P12814 [851-863]; O43707 [870-882]	1xCarbamidomethyl [C10]		0	1561.73	-0.130681																	-0.476642		-0.15948	-0.0928253				-0.340476
343	P12814; O43707	ACTN1	[R].FAIQDISVEETSAK.[E]	P12814 [134-147]; O43707 [153-166]			0	1537.77
343	P12814	ACTN1	[K].AGTQIENIEEDFRDGLK.[L]	P12814 [48-64]			1	1934.95
343	P12814; O43707	ACTN1	[K].AIMTYVSSFYHAFSGAQK.[A]	P12814 [237-254]; O43707 [256-273]			0	2007.96	-0.814513																													0.211682				-0.273848							-1.37354
343	P12814	ACTN1	[R].LAILGIHNEVSK.[I]	P12814 [566-577]			0	1293.75																																								0.770309
343	P12814	ACTN1	[K].ACLISLGYDIGNDPQGEAEFAR.[I]	P12814 [773-794]	1xCarbamidomethyl [C2]		0	2396.12													-0.200394		0.383668																							-0.0308888
343	P12814; O43707	ACTN1	[K].LASDLLEWIR.[R]	P12814 [282-291]; O43707 [301-310]			0	1215.67	-0.228152
343	P12814; O43707	ACTN1	[KR].HEAFESDLAAHQDR.[V]	P12814 [437-450]; O43707 [456-469]			0	1625.73							0.382432
343	P12814	ACTN1	[K].DDPLTNLNTAFDVAEK.[Y]	P12814 [199-214]			0	1762.85
343	P12814; O43707	ACTN1	[R].TINEVENQILTR.[D]	P12814 [727-738]; O43707 [746-757]			0	1429.76	0.0307348
343	P12814; O43707	ACTN1	[R].VGWEQLLTTIAR.[T]	P12814 [715-726]; O43707 [734-745]			0	1386.77	-0.142692
343	P12814; O43707	ACTN1	[K].HTNYTMEHIR.[V]	P12814 [705-714]; O43707 [724-733]			0	1301.61
343	P12814; O43707	ACTN1	[K].TFTAWCNSHLR.[K]	P12814 [36-46]; O43707 [55-65]	1xCarbamidomethyl [C6]		0	1392.65
343	P12814	ACTN1	[K].DYETATLSEIK.[A]	P12814 [421-431]			0	1269.62
343	P12814	ACTN1	[R].RDQALTEEHAR.[Q]	P12814 [614-624]			1	1325.66
343	P12814	ACTN1	[R].HRPELIDYGK.[L]	P12814 [186-195]			0	1227.65
343	P12814; O43707	ACTN1	[K].ASIHEAWTDGK.[E]	P12814 [403-413]; O43707 [422-432]			0	1214.58
343	P12814	ACTN1	[K].QFGAQANVIGPWIQTK.[M]	P12814 [634-649]			0	1757.93
343	P12814; O43707	ACTN1	[K].HTNYTMEHIR.[V]	P12814 [705-714]; O43707 [724-733]	1xOxidation [M6]		0	1317.6
344	P32119	PRDX2	[K].EGGLGPLNIPLLADVTR.[R]	P32119 [93-109]			0	1734.97																				-0.127199	-0.117857	-0.146541	-0.192312	-0.274041	-0.214033	-0.266575	-0.10572	-0.19379	-0.142592	-0.143921	-0.0964115	-0.165757	-0.121947	-0.162286	-0.120207	-0.183999	-0.28738	-0.116982	-0.0853724	-0.209661	-0.220488
344	P32119	PRDX2	[R].KEGGLGPLNIPLLADVTR.[R]	P32119 [92-109]			1	1863.07	-0.0141945											0.0529493			-0.103758		-0.100304	-0.174736	-0.113246	-0.145894	-0.0330089	-0.0565919	-0.0965311	-0.106691	-0.201853	-0.28544	-0.246142	-0.161398	-0.13638	-0.115835	-0.0797835	-0.0704816	-0.11051	-0.134301	-0.100047	-0.178674	-0.153478	-0.118909	-0.132165	-0.143373	-0.135939
344	P32119	PRDX2	[R].LVQAFQYTDEHGEVCPAGWKPGSDTIKPNVDDSK.[E]	P32119 [158-191]	1xCarbamidomethyl [C15]		0	3788.79	0.183791					-0.816491										0.51882				-1.04355	-1.05312	-1.12797		-1.22519	-0.274402	-0.186687	-0.213404	-0.00581216		-0.21924	-0.205762	-0.0639988	-0.185818	-1.74379	-0.2788			-1.13027		-1.07387	-1.0054
344	P32119	PRDX2	[K].LGCEVLGVSVDSQFTHLAWINTPR.[K]	P32119 [68-91]	1xCarbamidomethyl [C3]		0	2699.36							-0.442562															-0.20243	-0.178361		-0.358581									-0.615534
344	P32119	PRDX2	[R].RLSEDYGVLK.[T]	P32119 [110-119]			1	1179.64	0.0134725						-0.282645												-0.0516591	-0.0222177	-0.0391946	-0.31334		0.0847197		-0.33177	-0.144622		0.0563537	-0.0855513	-0.290229	0.151522	0.180949		-0.1103	1.68169			-0.116795		-0.0363132
344	P32119	PRDX2	[R].LSEDYGVLK.[T]	P32119 [111-119]			0	1023.54
345	Q9UK76	HN1; JPT1	[R].VLRPPGGGSNFSLGFDEPTEQPVRK.[N]	Q9UK76 [20-44]			1	2684.38
345	Q9UK76	HN1; JPT1	[K].SSGGREDLESSGLQR.[R]	Q9UK76 [70-84]			1	1577.75							-0.440003																																		0.0107662
346	Q9UMS4	PRPF19	[K].TVPEELVKPEELSK.[Y]	Q9UMS4 [193-206]			0	1597.87																																	-0.0215837
347	P04406	GAPDH	[K].RVIISAPSADAPMFVMGVNHEK.[Y]	P04406 [118-139]	1xOxidation [M]		1	2385.21	-0.279766
347	P04406	GAPDH	[K].IISNASCTTNCLAPLAK.[V]	P04406 [146-162]	2xCarbamidomethyl [C7; C11]		0	1833.92	1.68017							-0.658825																-0.535331
347	P04406	GAPDH	[K].LVINGNPITIFQERDPSK.[I]	P04406 [67-84]			1	2041.11
347	P04406	GAPDH	[K].GILGYTEHQVVSSDFNSDTHSSTFDAGAGIALNDHFVK.[L]	P04406 [272-309]			0	4036.89	0.753157	0.226416	-0.383122	-0.60272	-0.487321	0.634665		-0.148854			-0.988867										1.95615	-0.411271		-1.4788				0.393634		-0.178104		-0.234009	0.773717								-0.487846
347	P04406	GAPDH	[R].VIISAPSADAPMFVMGVNHEK.[Y]	P04406 [119-139]			0	2213.11	0.000812993
347	P04406	GAPDH	[K].VDIVAINDPFIDLNYMVYMFQYDSTHGK.[F]	P04406 [28-55]			0	3308.56					-0.1881
347	P04406	GAPDH	[K].VIHDNFGIVEGLMTTVHAITATQK.[T]	P04406 [163-186]			0	2595.36	0.0138273
347	P04406	GAPDH	[K].VIHDNFGIVEGLMTTVHAITATQK.[T]	P04406 [163-186]	1xOxidation [M13]		0	2611.35	0.0102697				-0.741802
347	P04406	GAPDH	[K].WGDAGAEYVVESTGVFTTMEK.[A]	P04406 [87-107]	1xOxidation [M19]		0	2293.03
347	P04406	GAPDH	[K].WGDAGAEYVVESTGVFTTMEK.[A]	P04406 [87-107]			0	2277.04	0.091307	0.311854																0.635862																0.47386
347	P04406	GAPDH	[R].VPTANVSVVDLTCR.[L]	P04406 [235-248]	1xCarbamidomethyl [C13]		0	1530.79	-0.916548
347	P04406	GAPDH	[R].VVDLMAHMASK.[E]	P04406 [324-334]			0	1201.61	-0.0333619																									-0.220492							-0.337147
347	P04406	GAPDH	[K].LVINGNPITIFQER.[D]	P04406 [67-80]			0	1613.9	-0.0110662
347	P04406	GAPDH	[R].VVDLMAHMASKE.[-]	P04406 [324-335]	1xOxidation [M5]		1	1346.64					1.34699																-0.0313974																				-0.327914
347	P04406	GAPDH	[R].VVDLMAHMASKE.[-]	P04406 [324-335]			1	1330.65	0.191544
347	P04406	GAPDH	[R].VVDLMAHMASK.[E]	P04406 [324-334]	2xOxidation [M5; M8]		0	1233.6						0.312703																												-0.471628
347	P04406	GAPDH	[R].VVDLMAHMASK.[E]	P04406 [324-334]	1xOxidation [M]		0	1217.6	-1.09739																																-0.876677
347	P04406	GAPDH	[K].LISWYDNEFGYSNR.[V]	P04406 [310-323]			0	1763.8	-0.00365924							-0.665345
347	P04406	GAPDH	[K].IISNASCTTNCLAPLAKVIHDNFGIVEGLMTTVHAITATQK.[T]	P04406 [146-186]	2xCarbamidomethyl [C7; C11]		1	4410.26		0.0317662																																		-1.11742
347	P04406	GAPDH	[K].VDIVAINDPFIDLNYMVYMFQYDSTHGK.[F]	P04406 [28-55]	1xOxidation [M19]		0	3324.56
347	P04406	GAPDH	[R].VIISAPSADAPMFVMGVNHEK.[Y]	P04406 [119-139]	1xOxidation [M]		0	2229.1											0.846703
347	P04406	GAPDH	[K].RVIISAPSADAPMFVMGVNHEK.[Y]	P04406 [118-139]			1	2369.21
347	P04406	GAPDH	[K].RVIISAPSADAPMFVMGVNHEK.[Y]	P04406 [118-139]	2xOxidation [M13; M16]		1	2401.2
[truncated: 3,219 more rows]
[truncated: 56 more columns]
